# Supplementary material for: Modern cemented total knee arthroplasty design shows a higher incidence of radiolucent lines compared to its predecessor
Source: Springer Nature journal article supplement (doi:10.1007/s00167-018-5130-0), 2018-09-22

# Case 1

preoperative

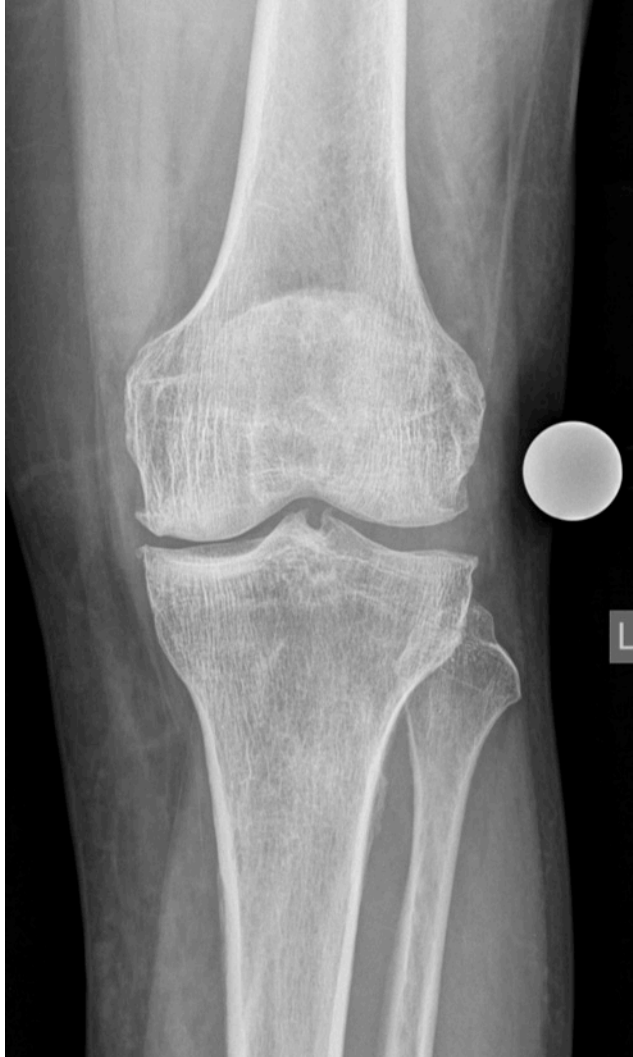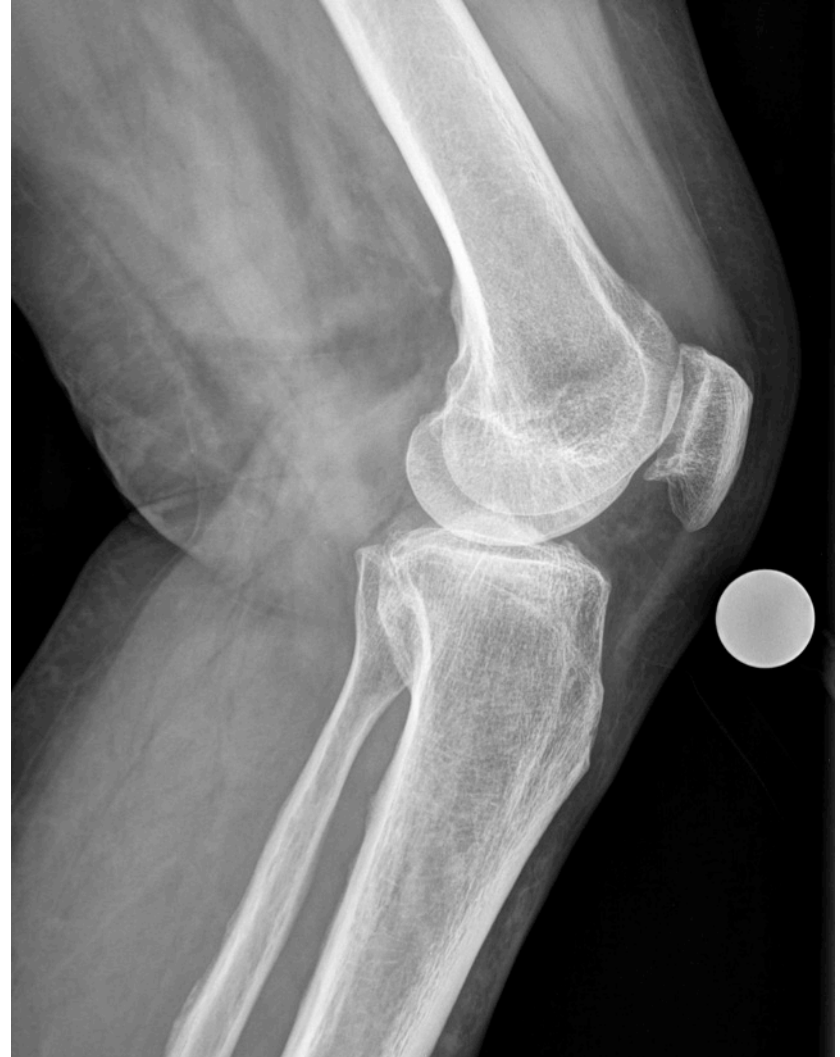

6 weeks postop

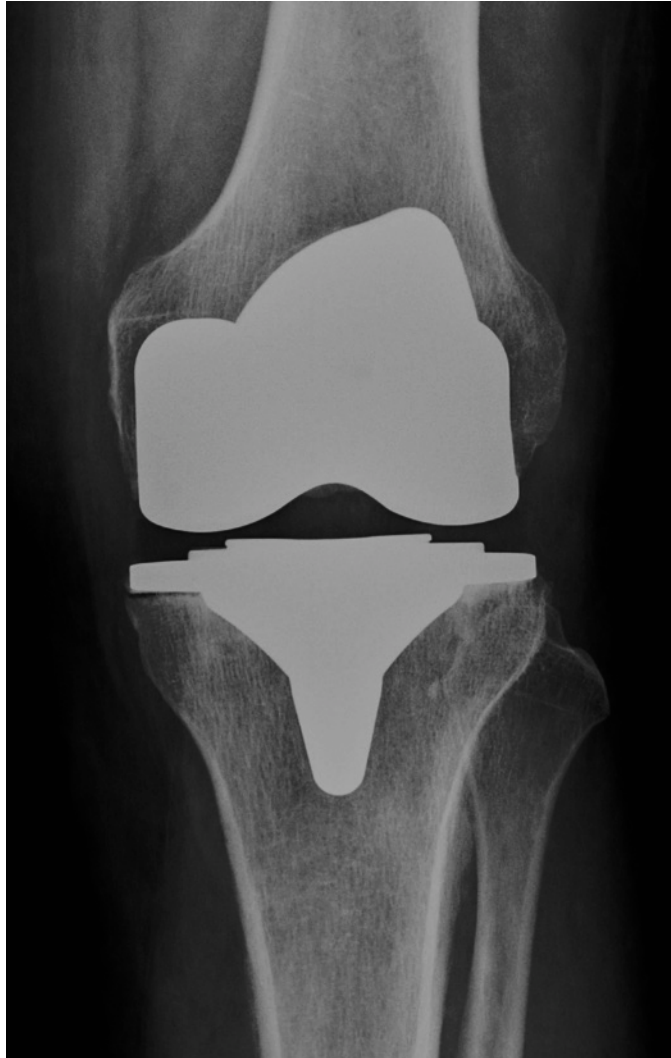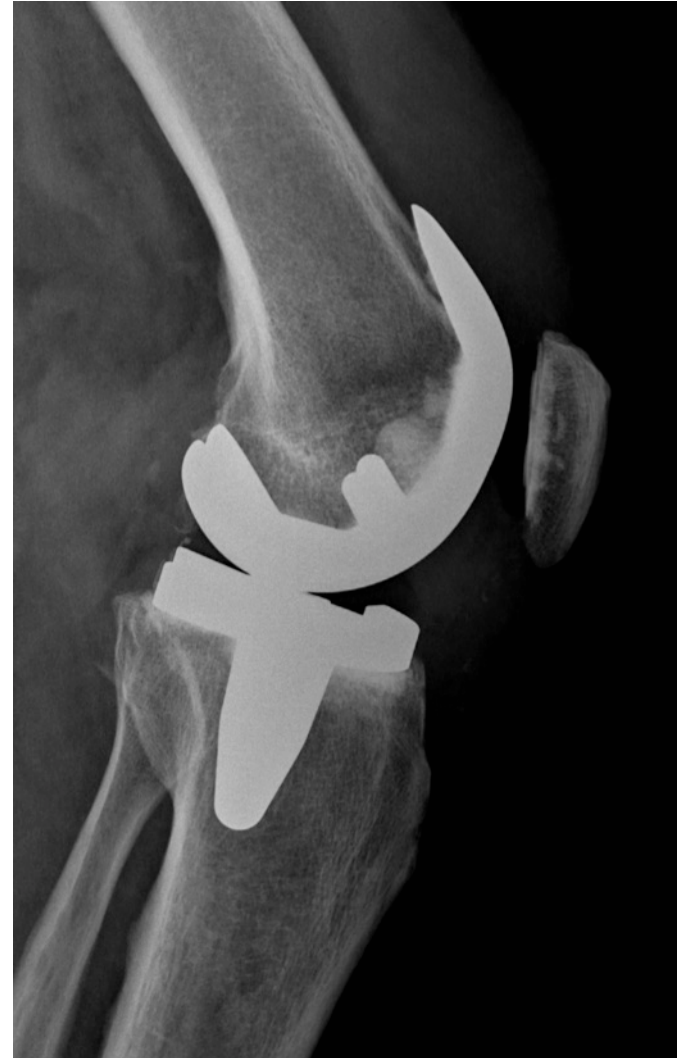

6 months postop

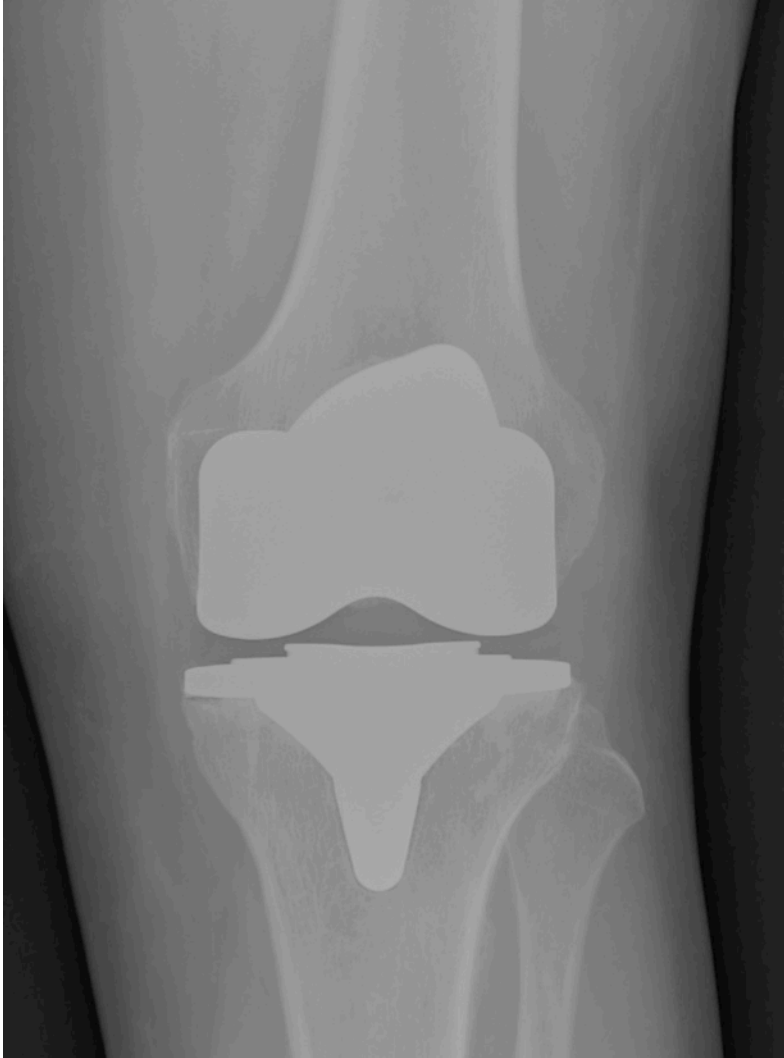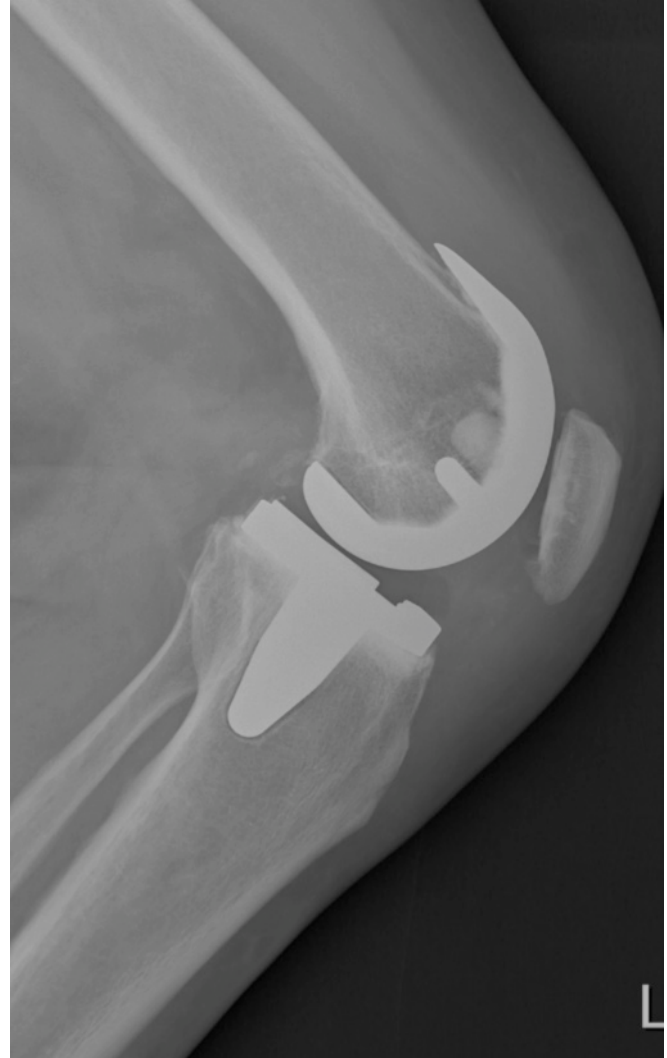



12 months postop

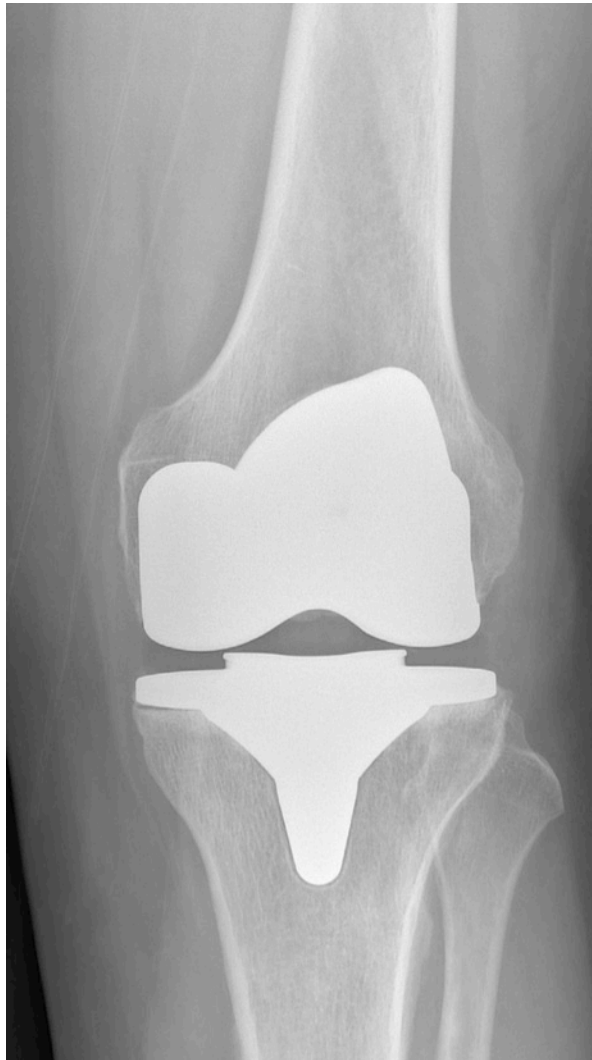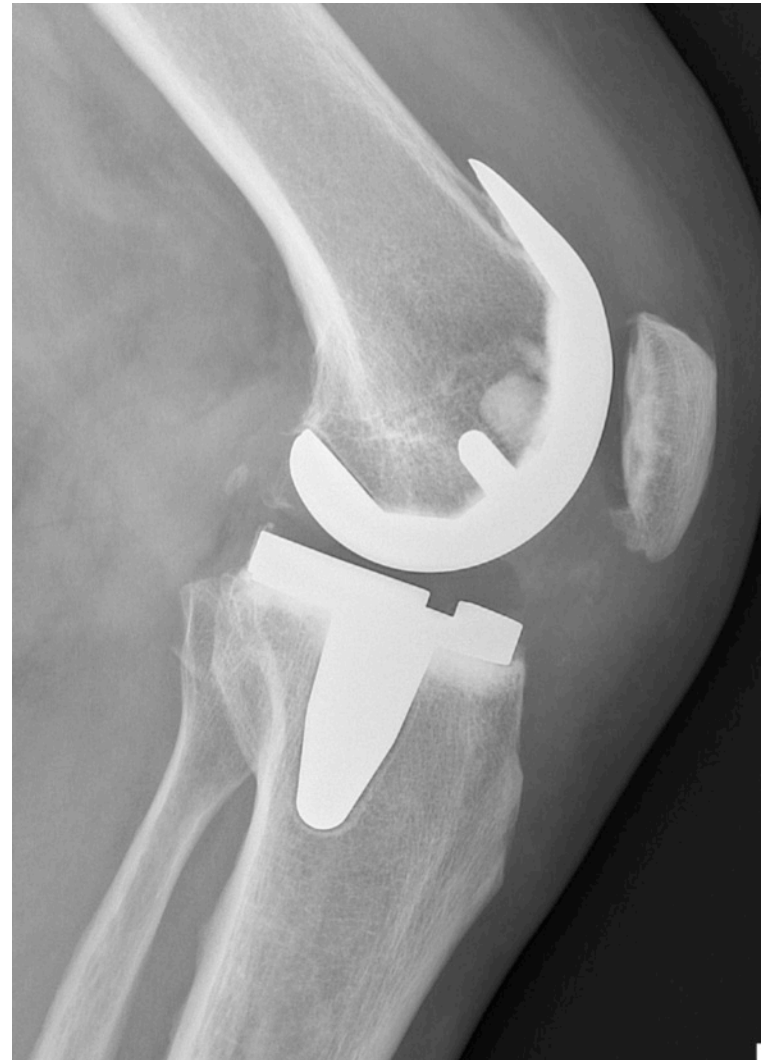

# Case 2

preoperative

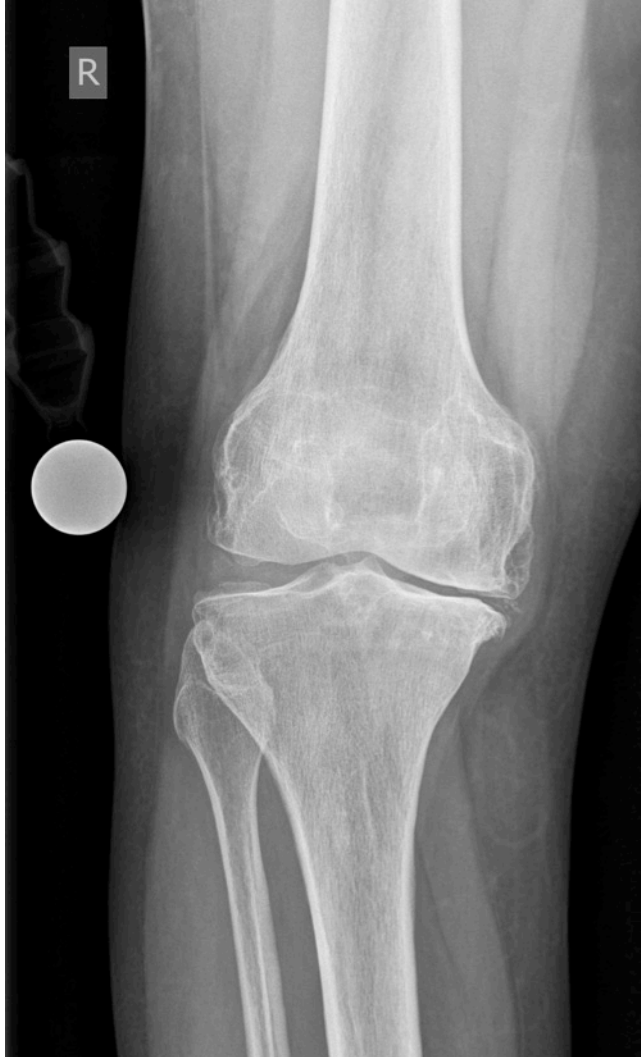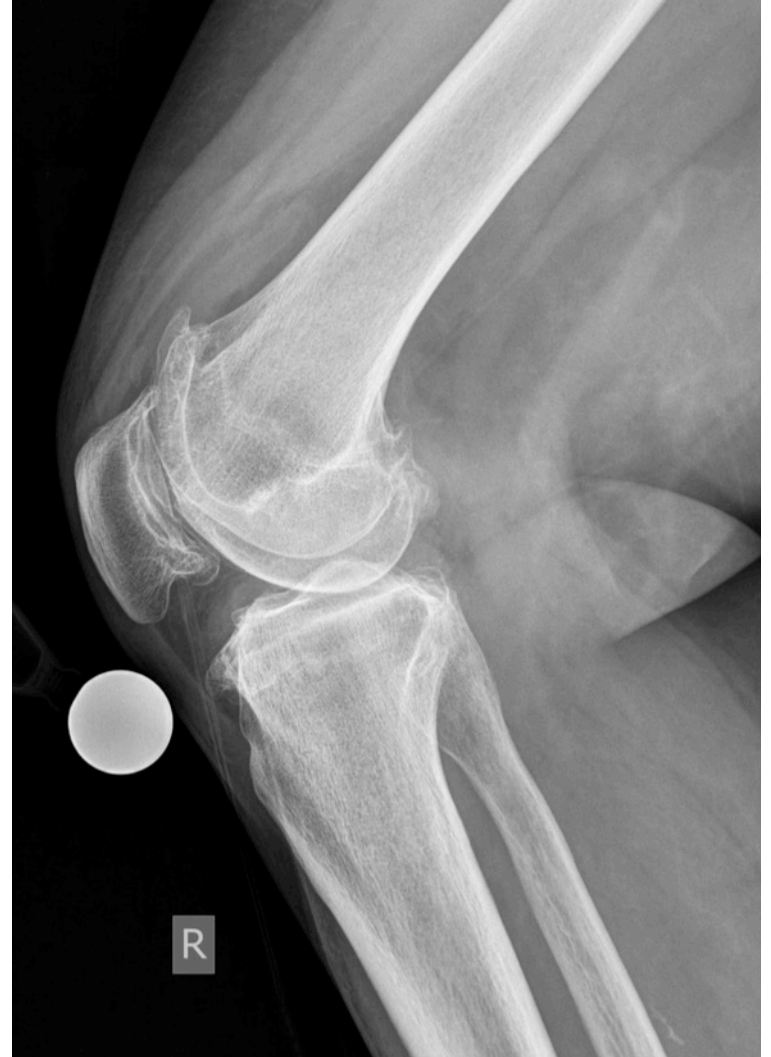

6 weeks postop

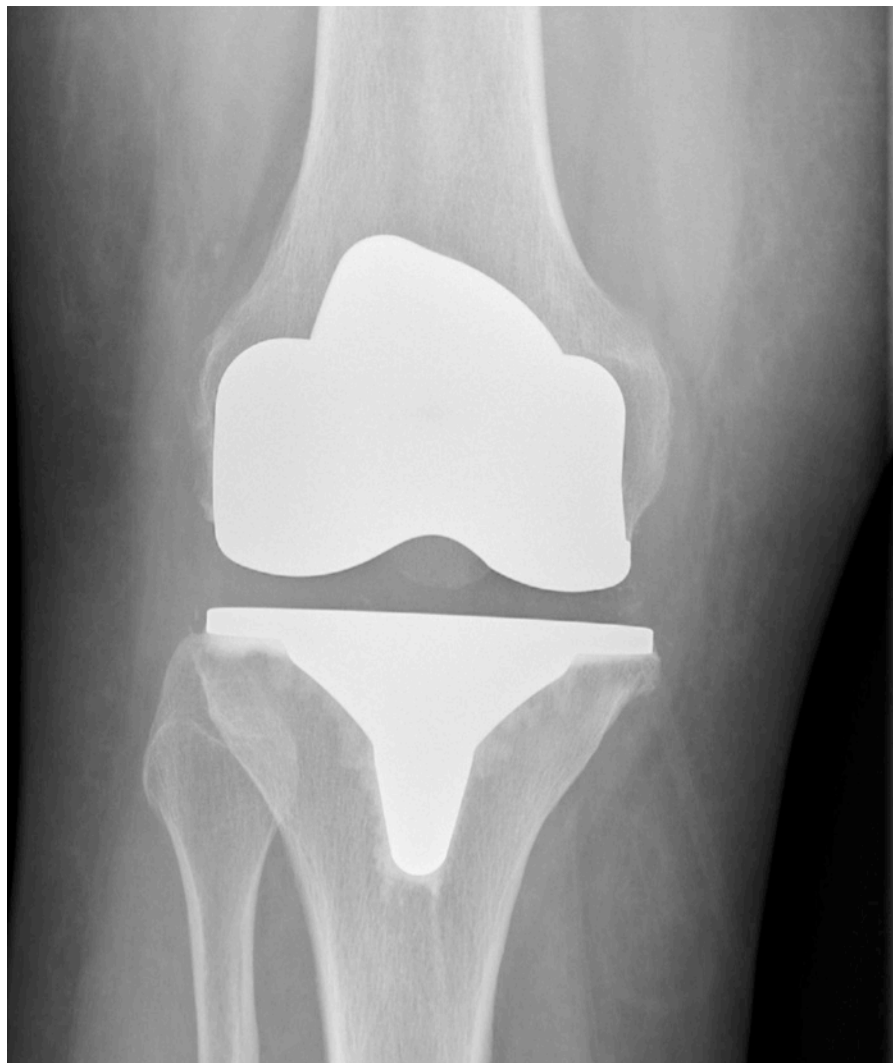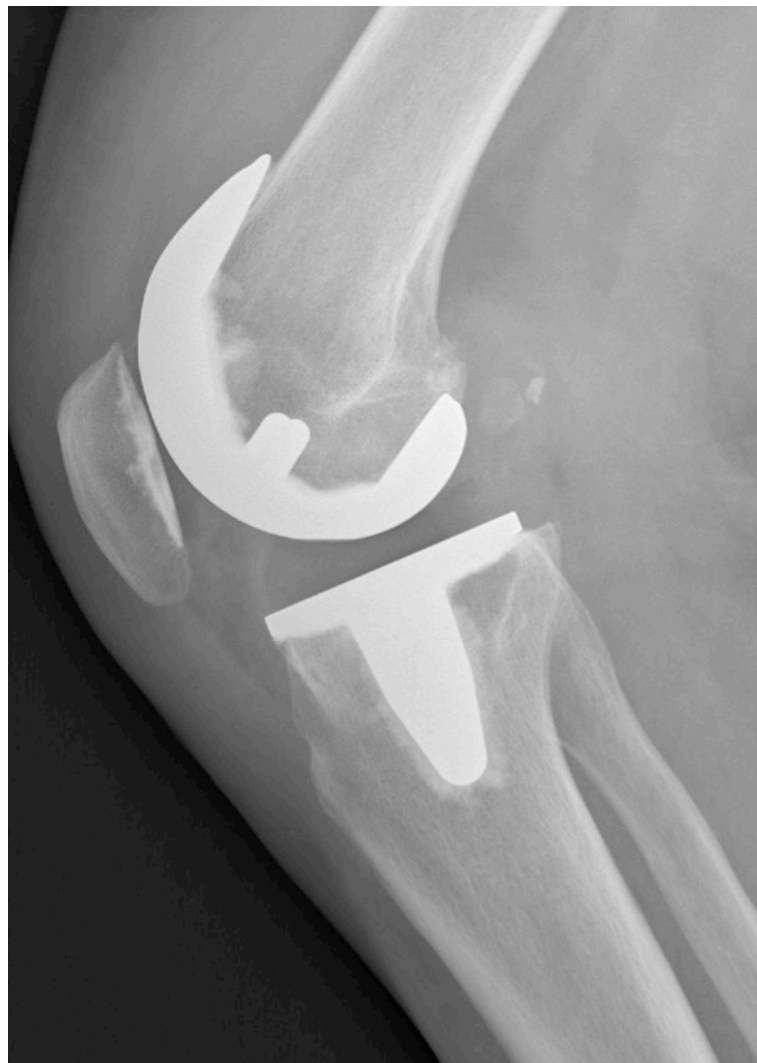

6 months postop

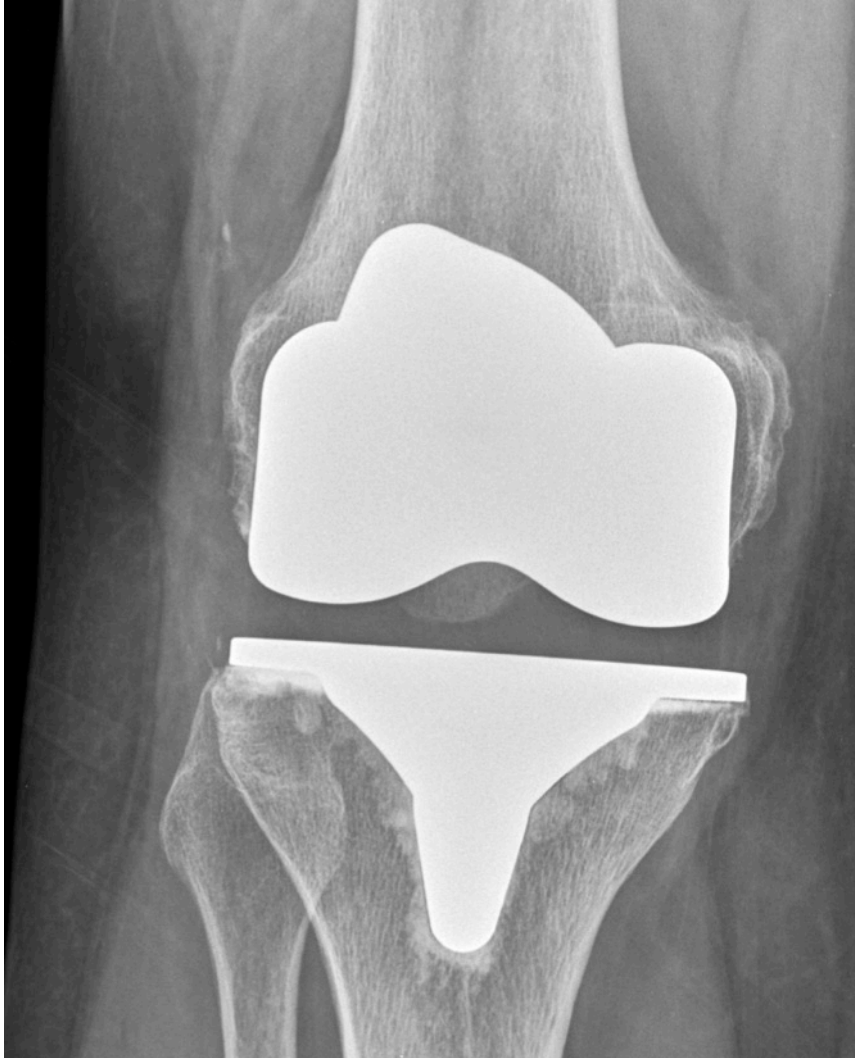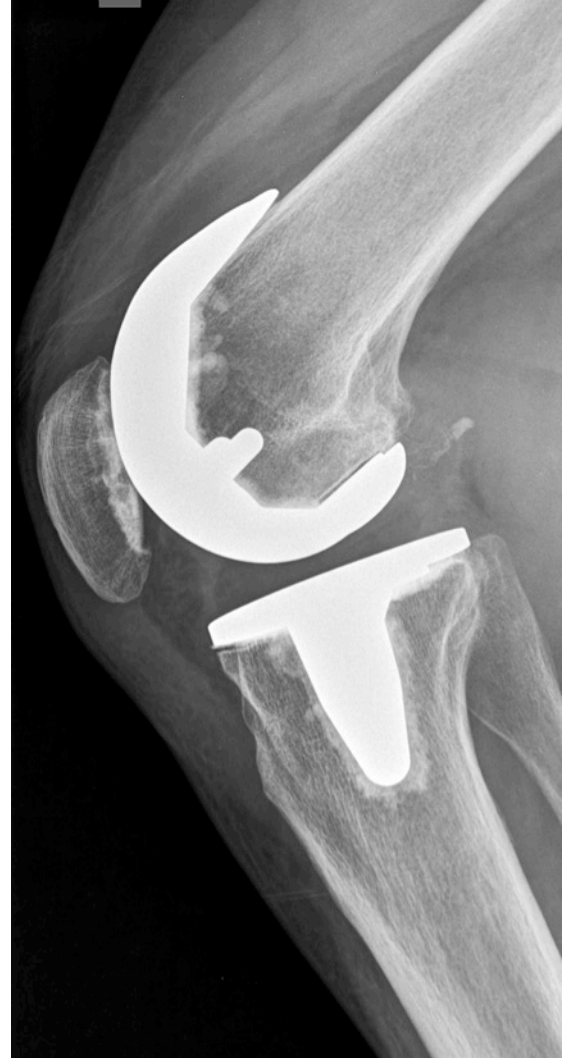

12 months postop

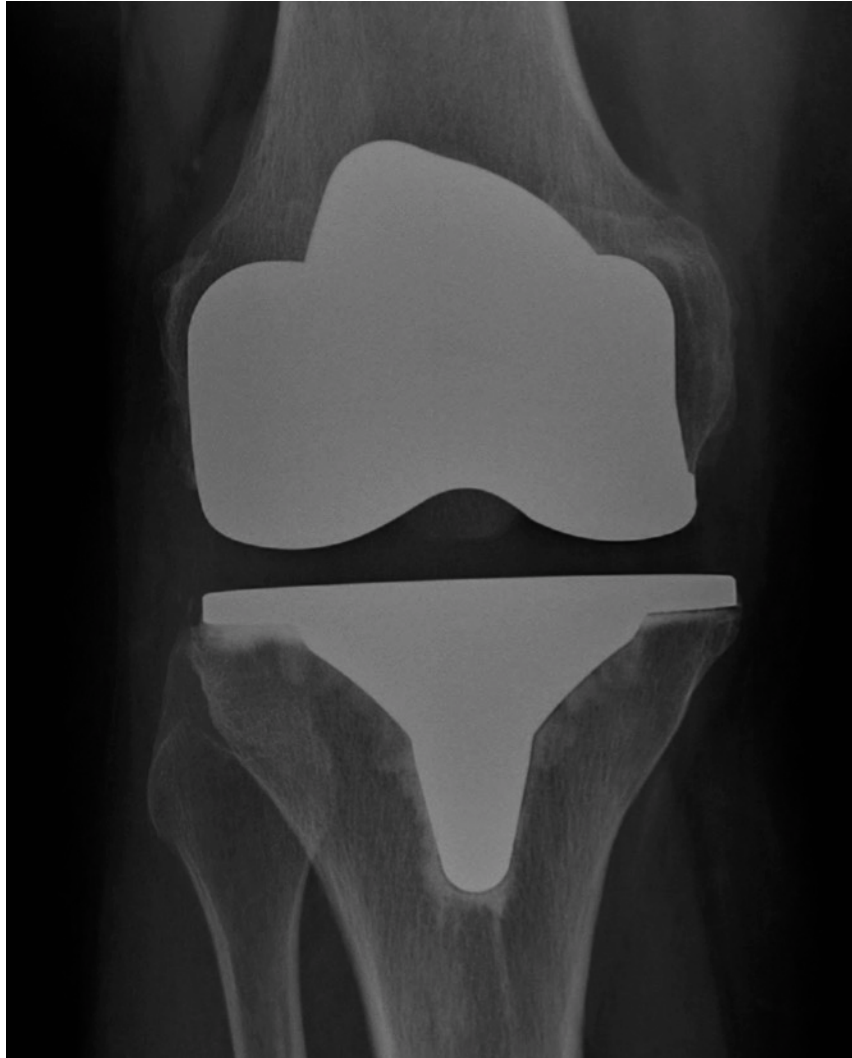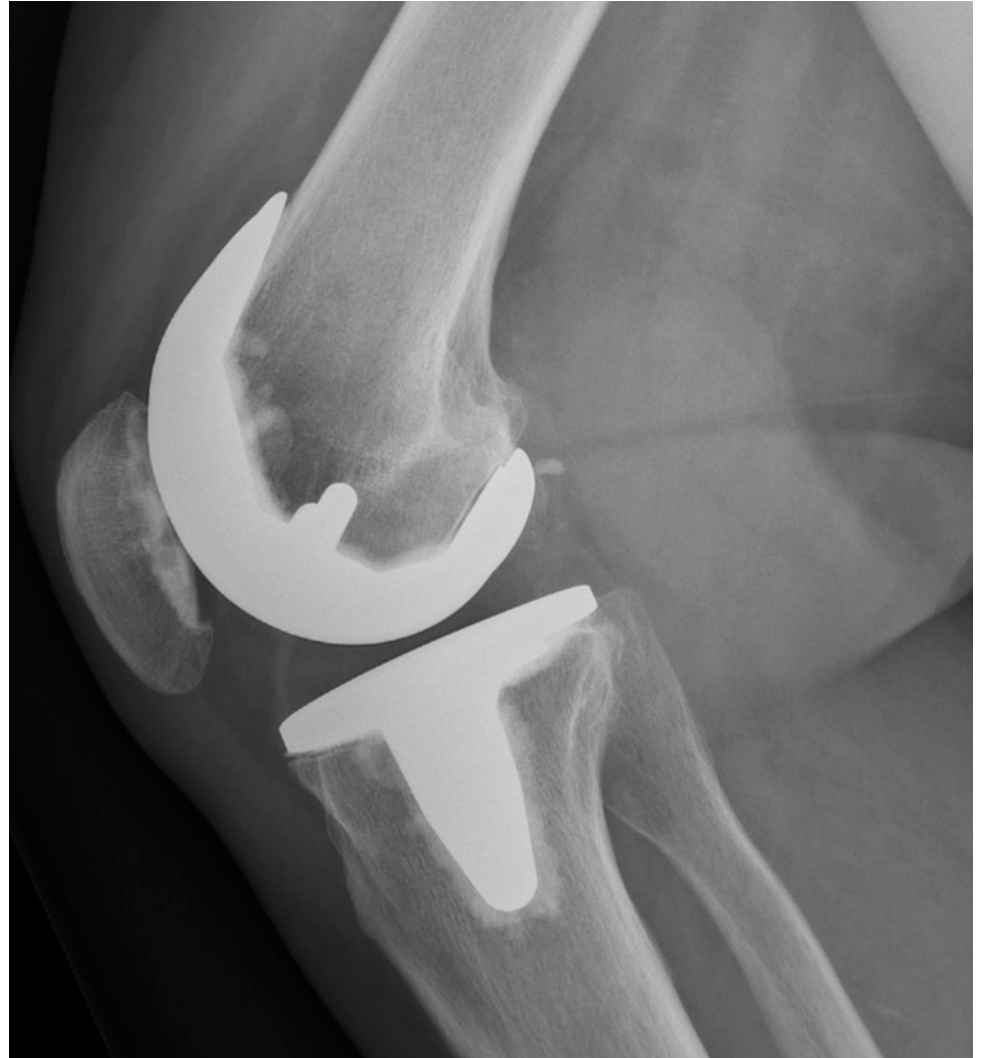

# Case 3

preoperative

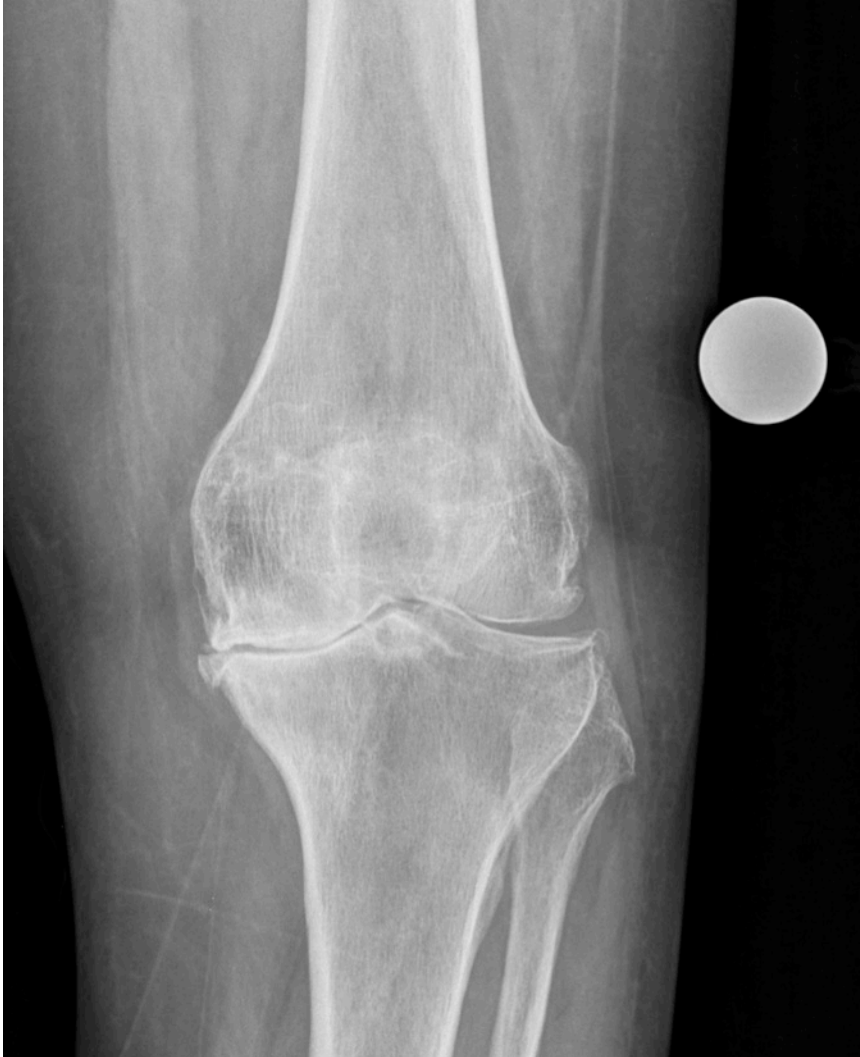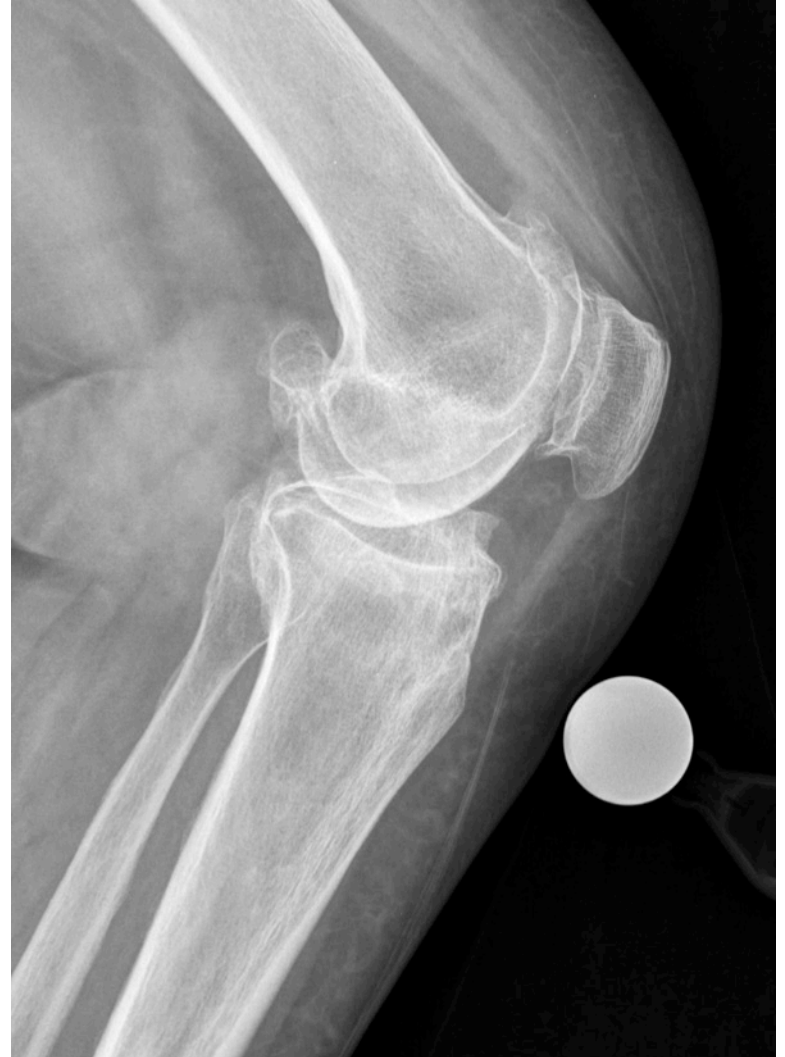



6 weeks postop

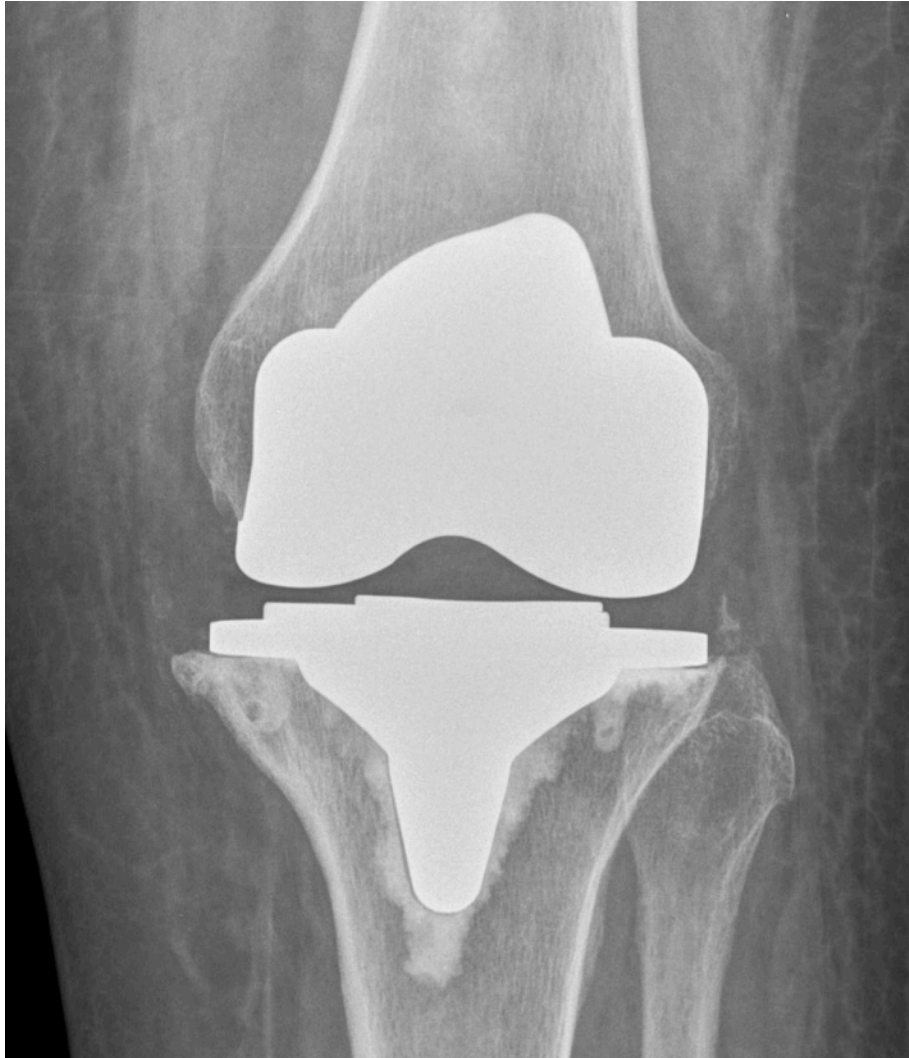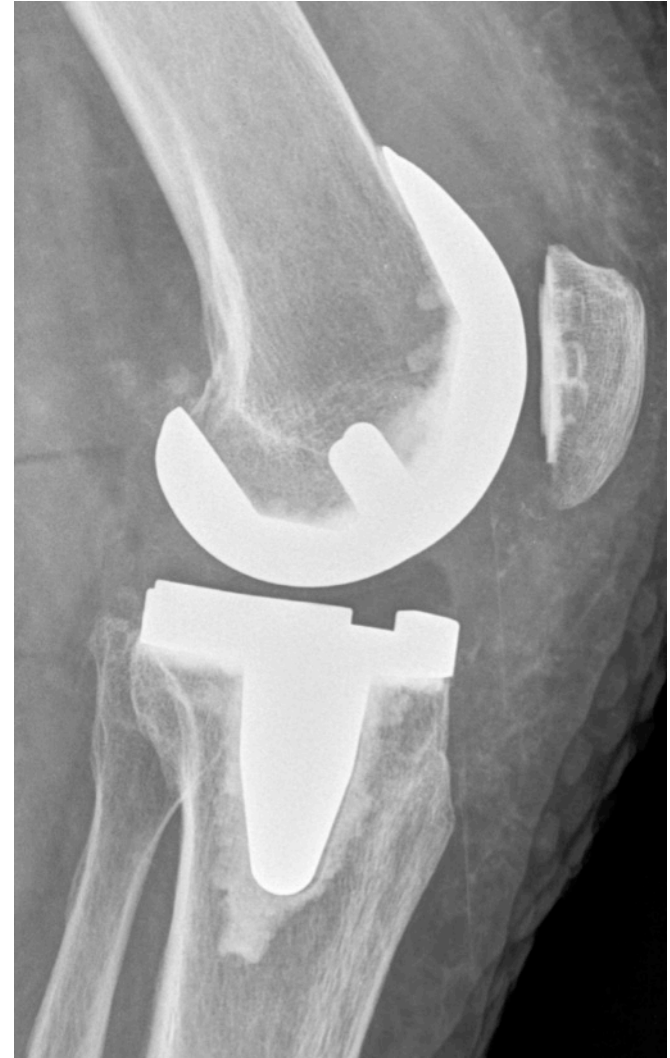

6 months postop

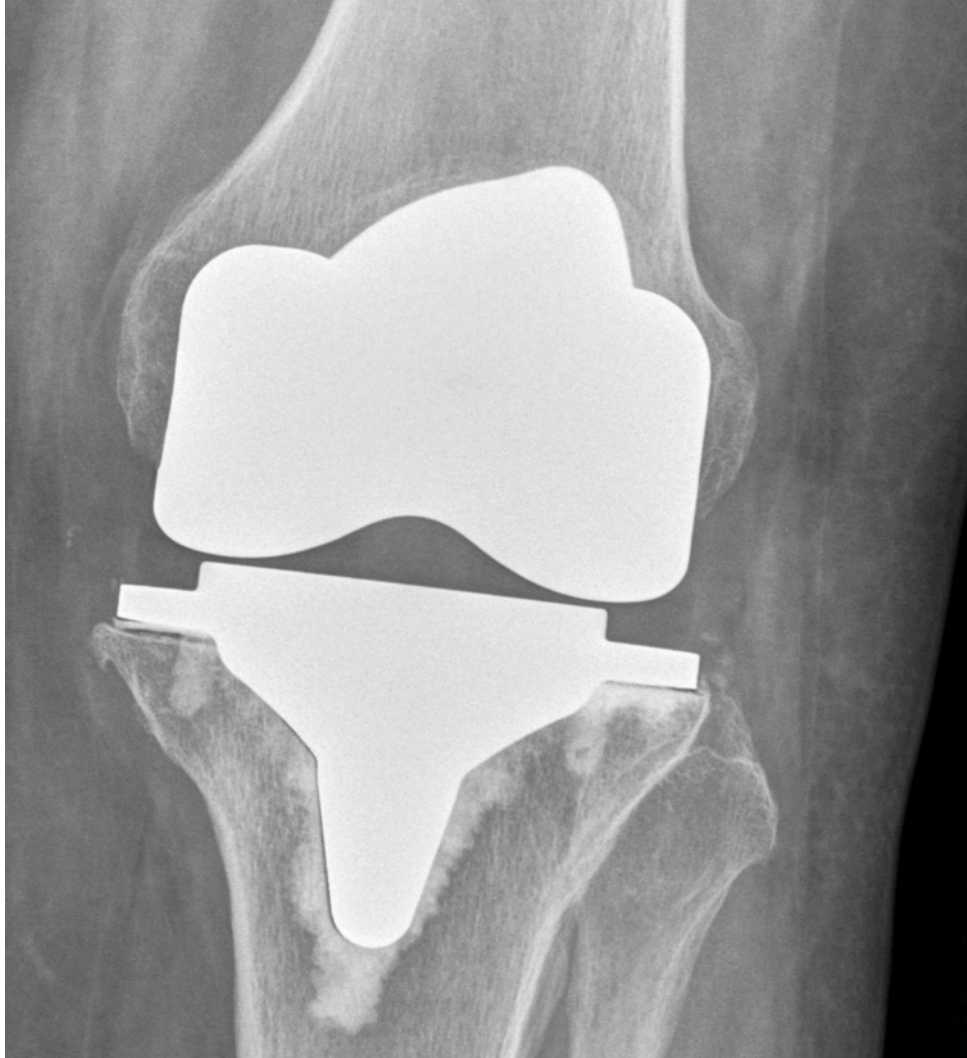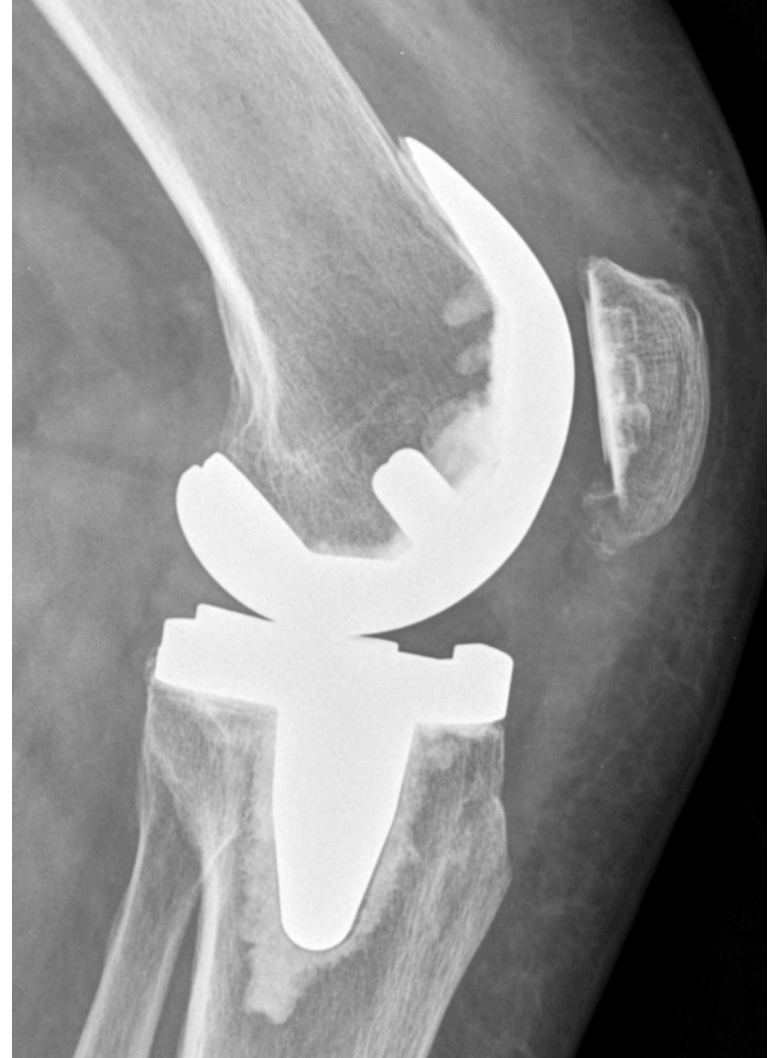

12 months postop

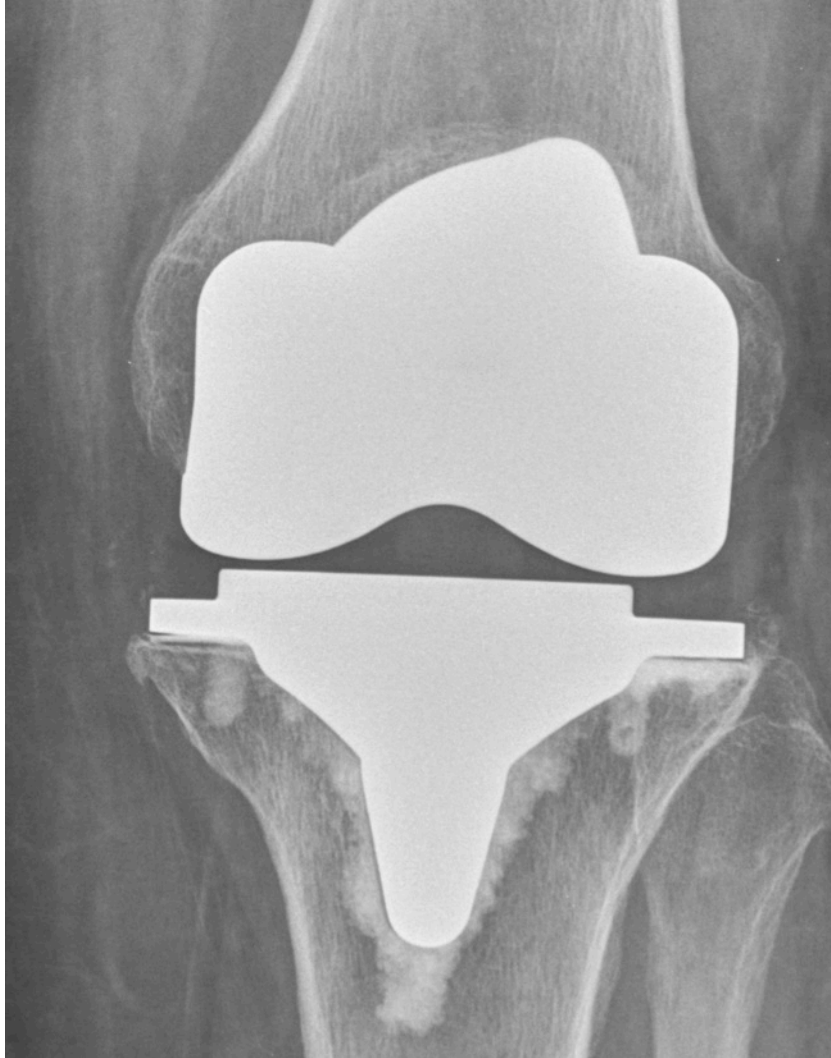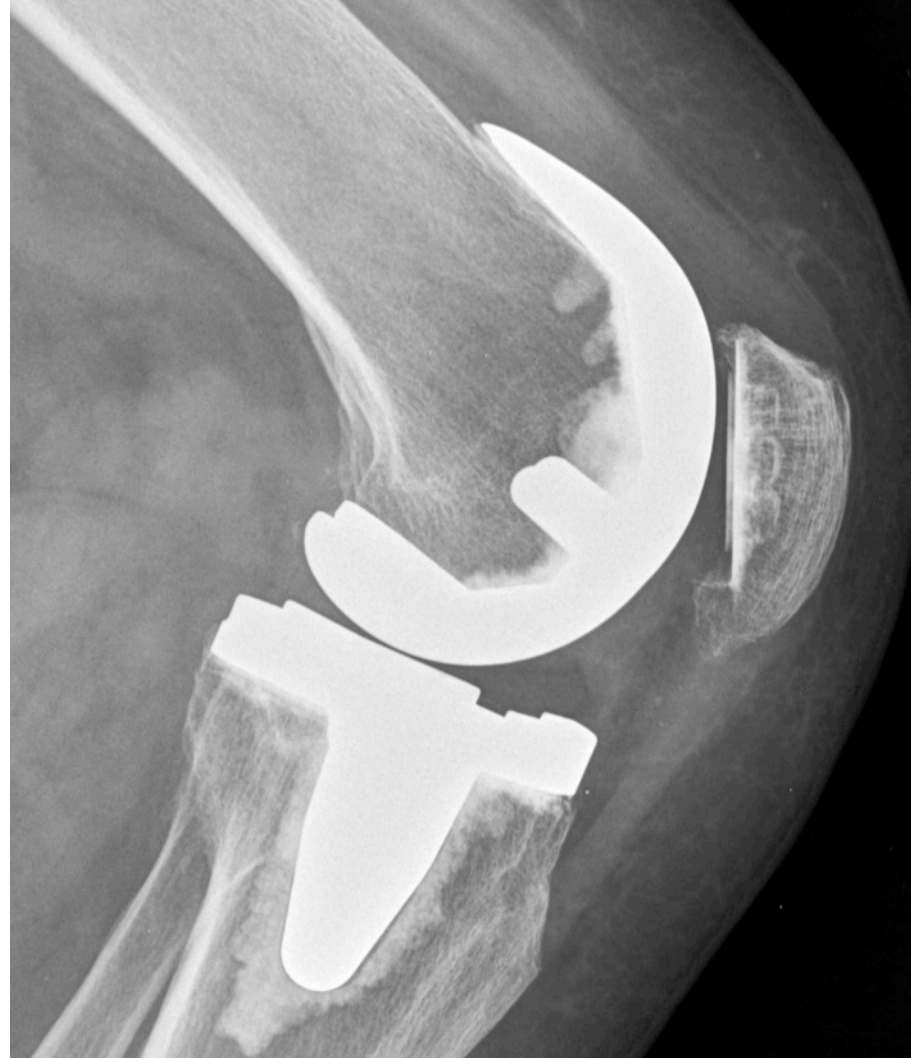

# Case 4

preoperative

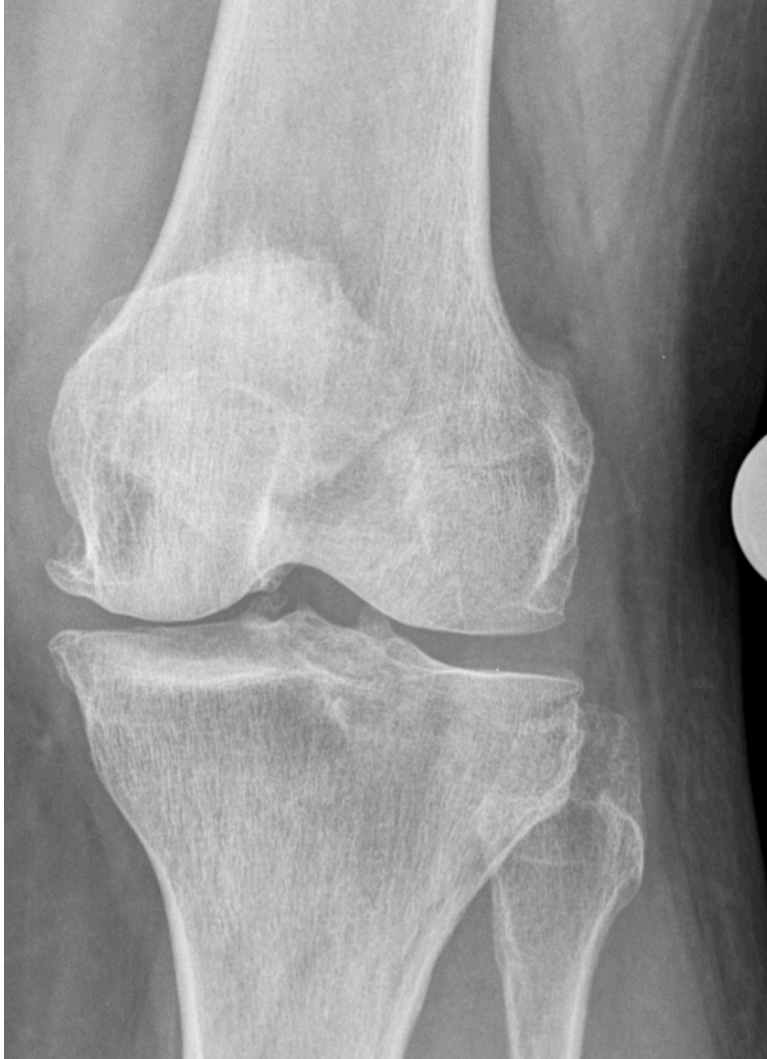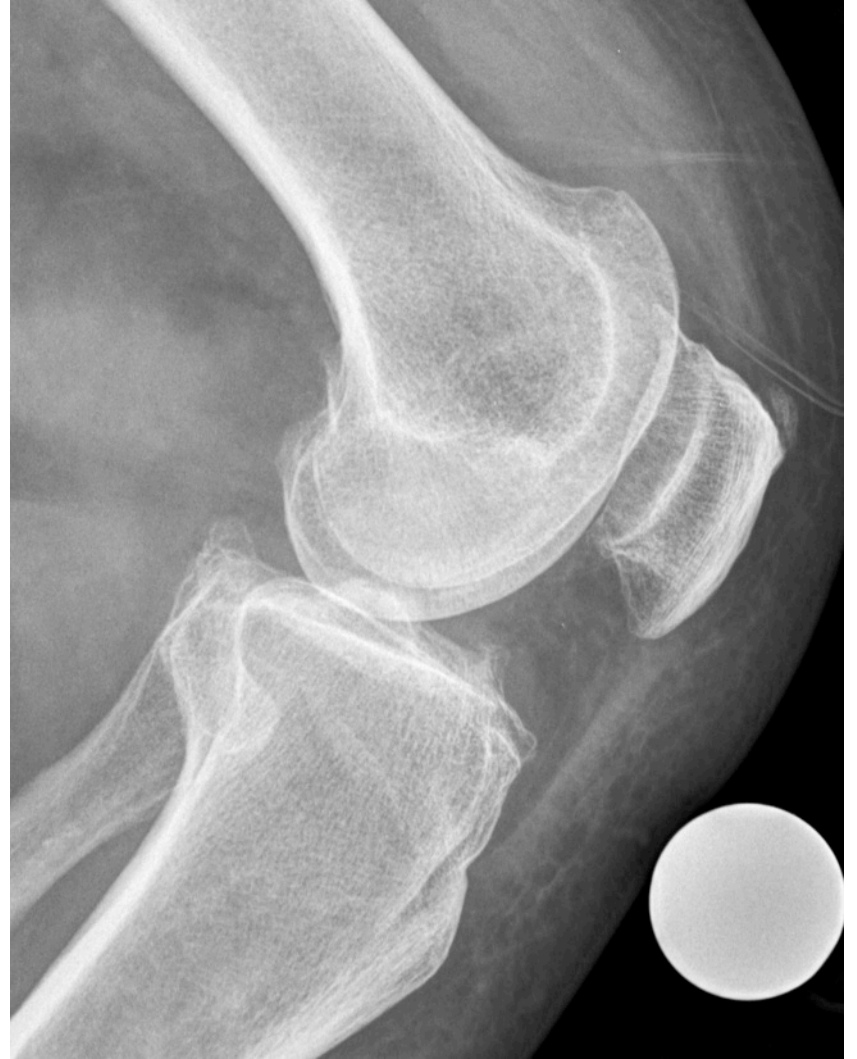

6 weeks postop

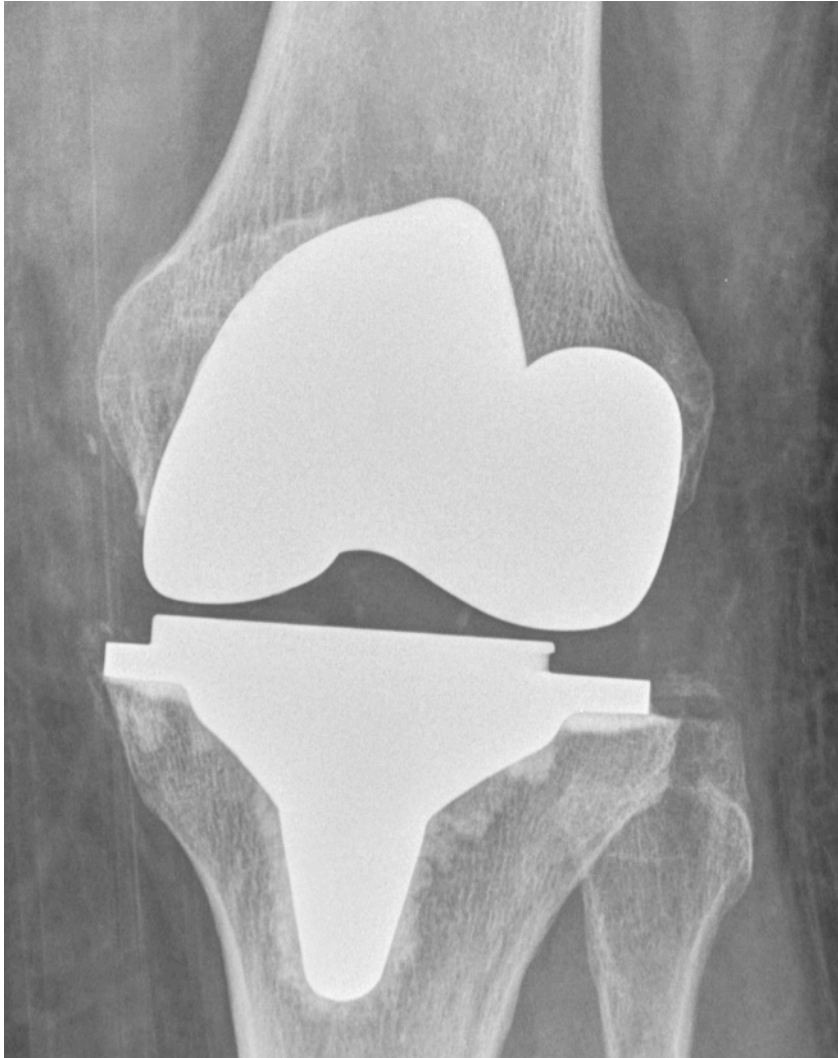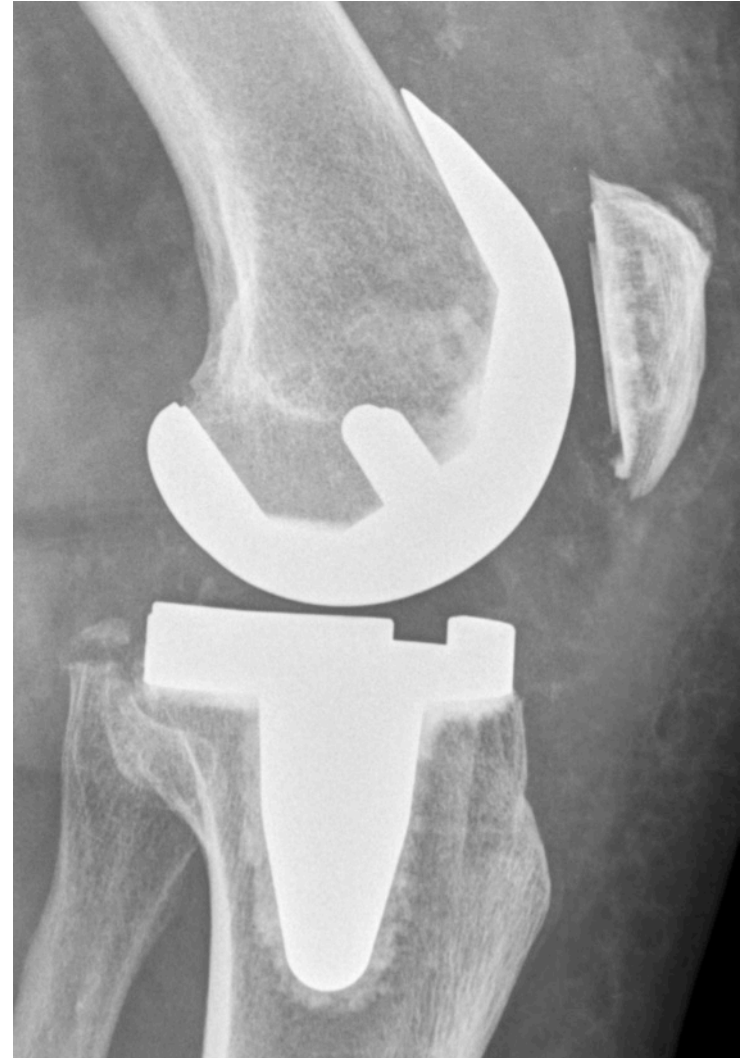

6 months postop

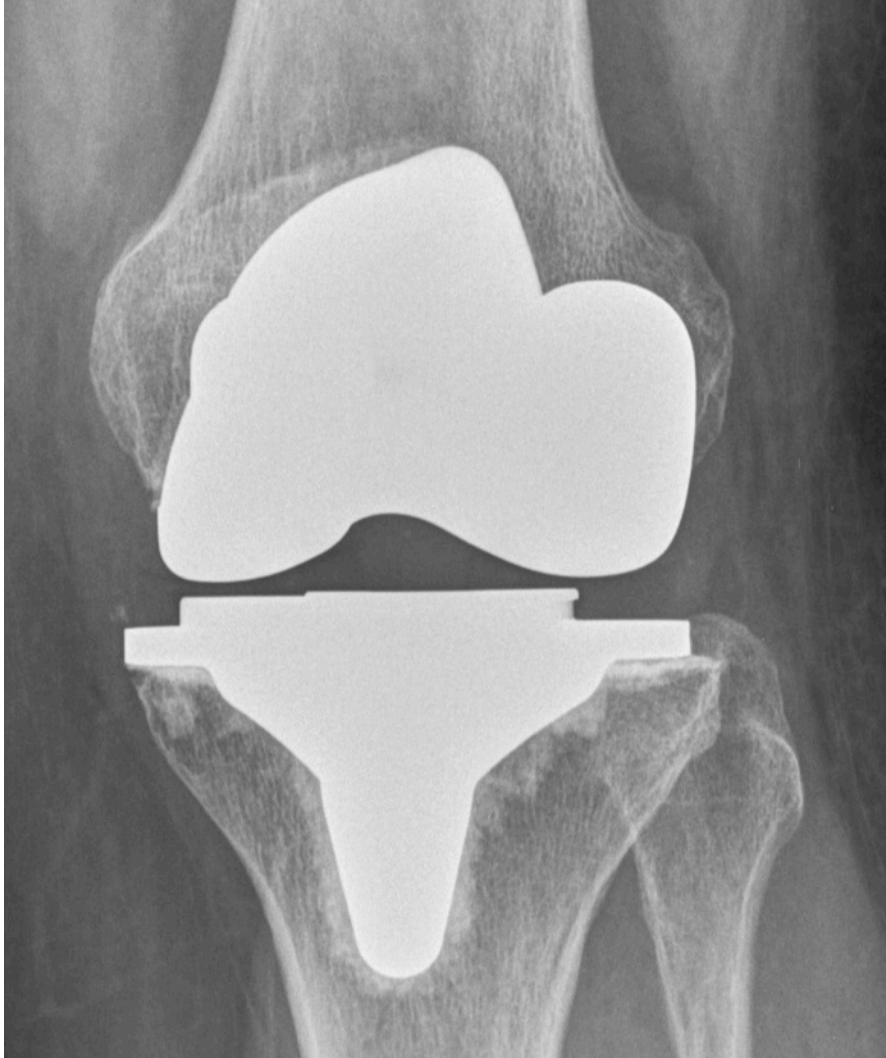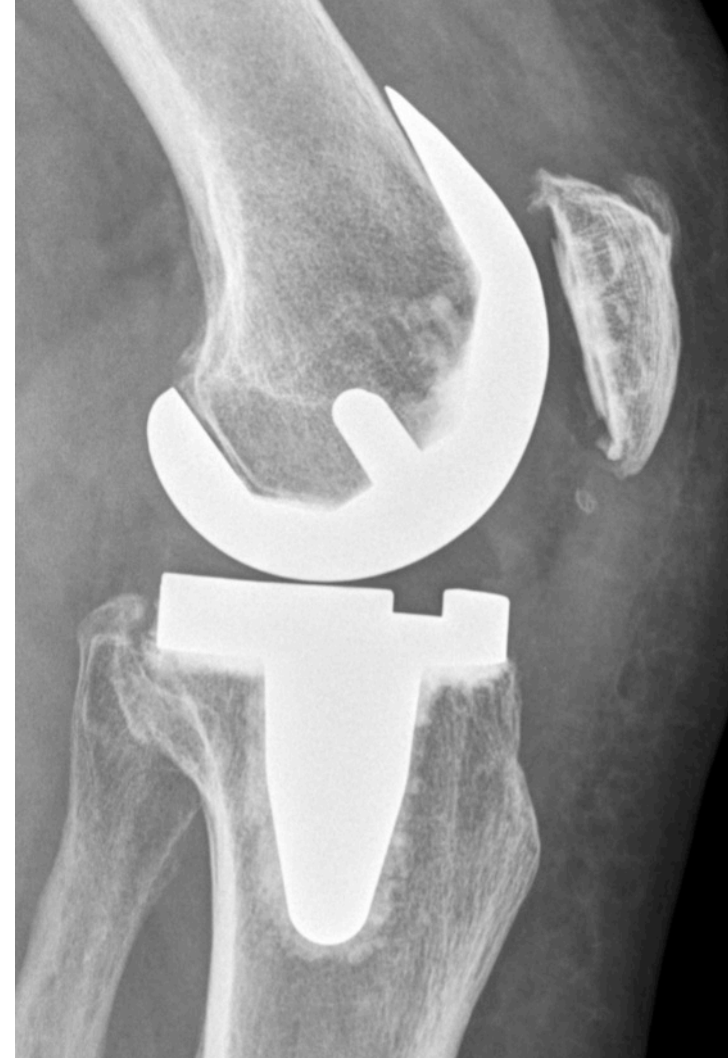



12 months postop

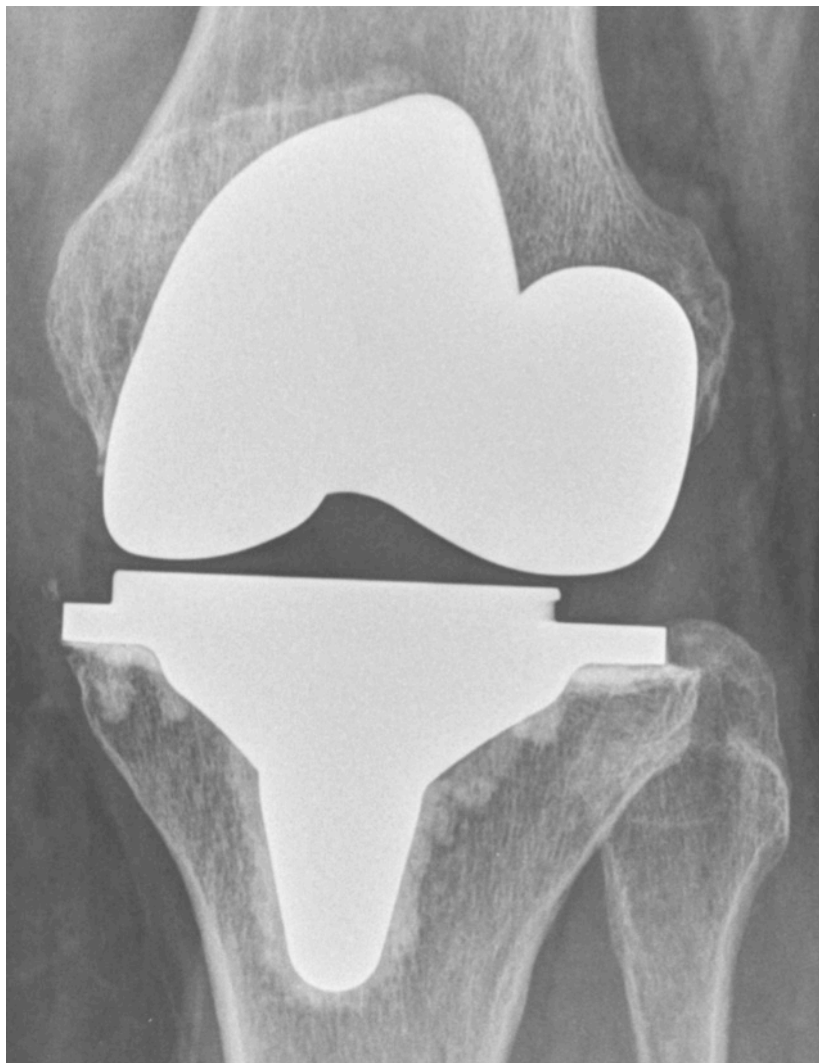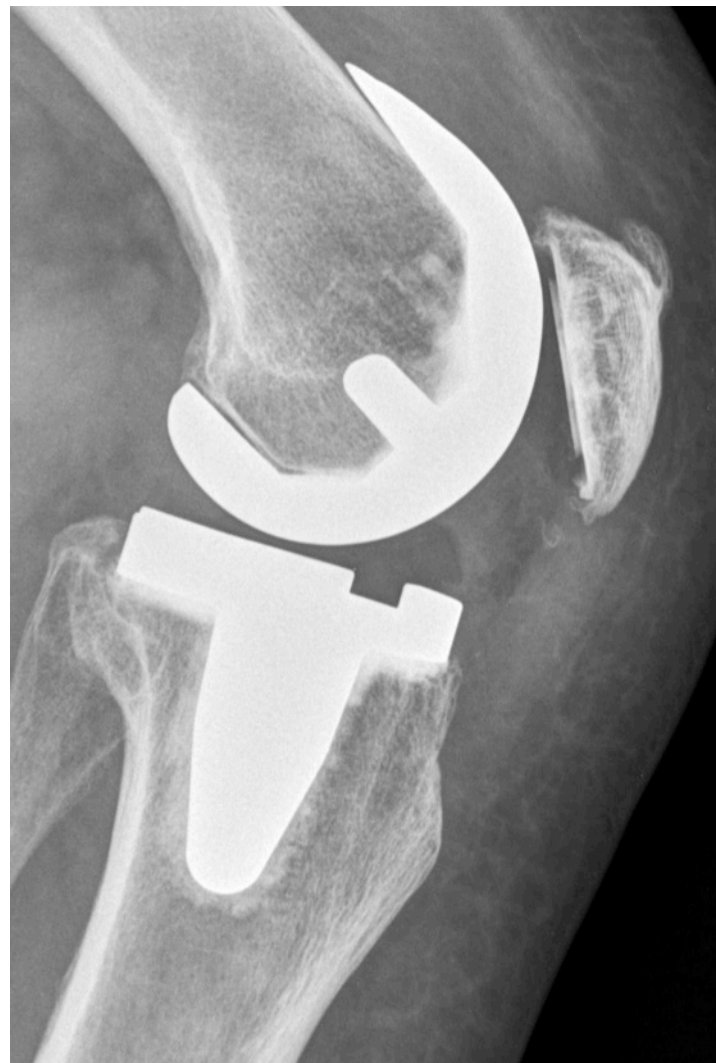



# Case 5

preoperative

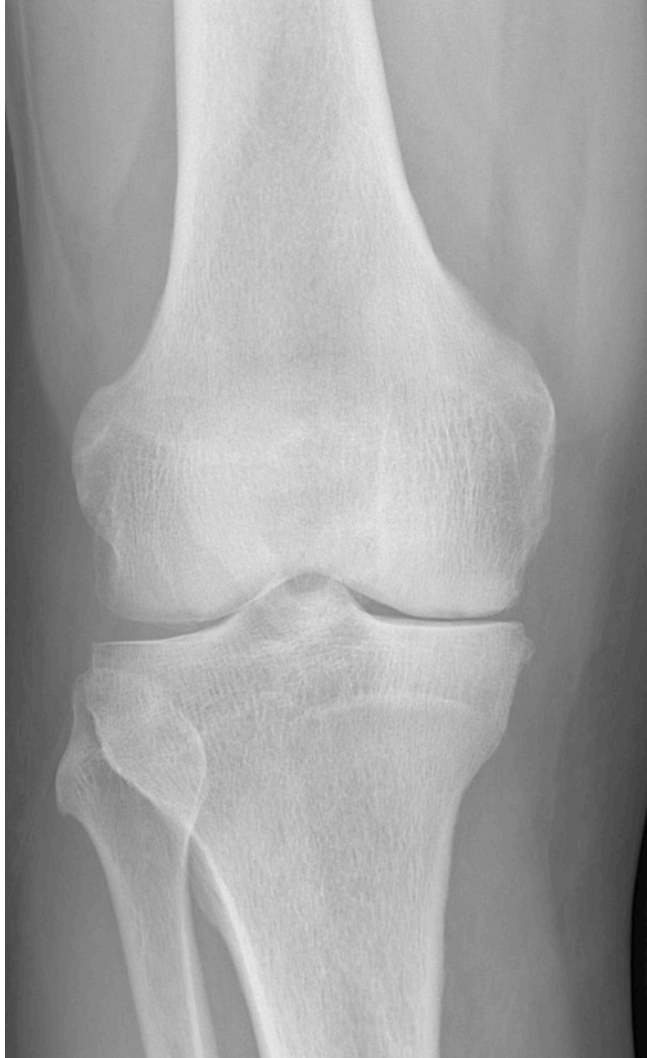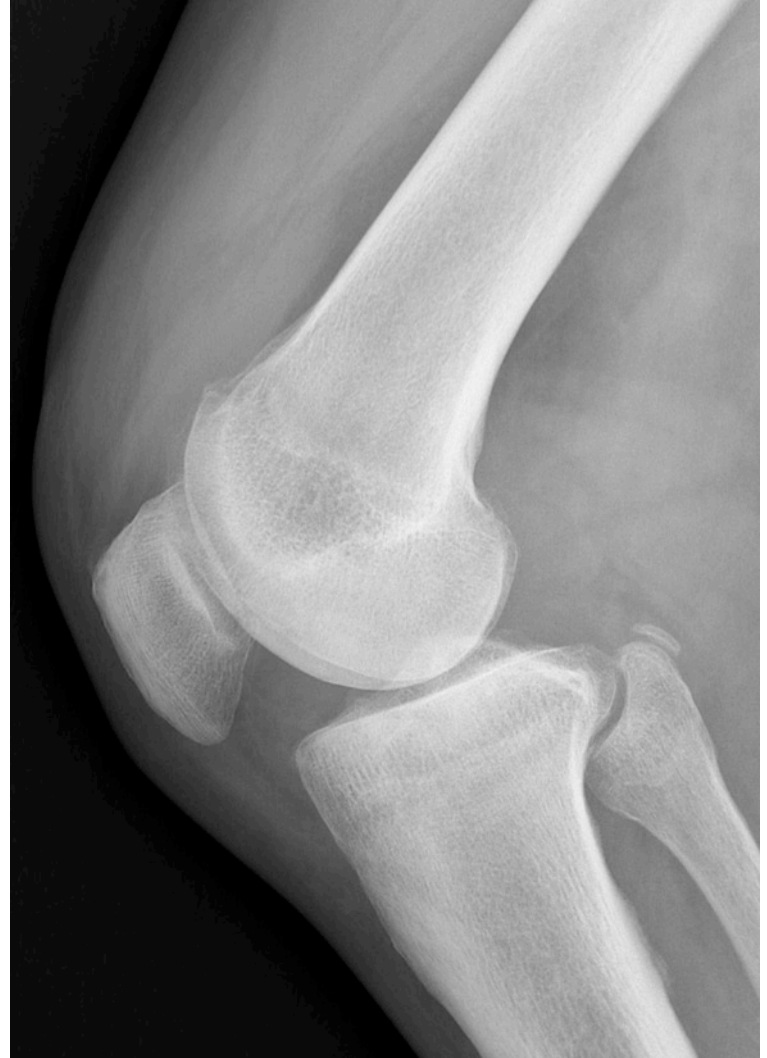

6 weeks postop

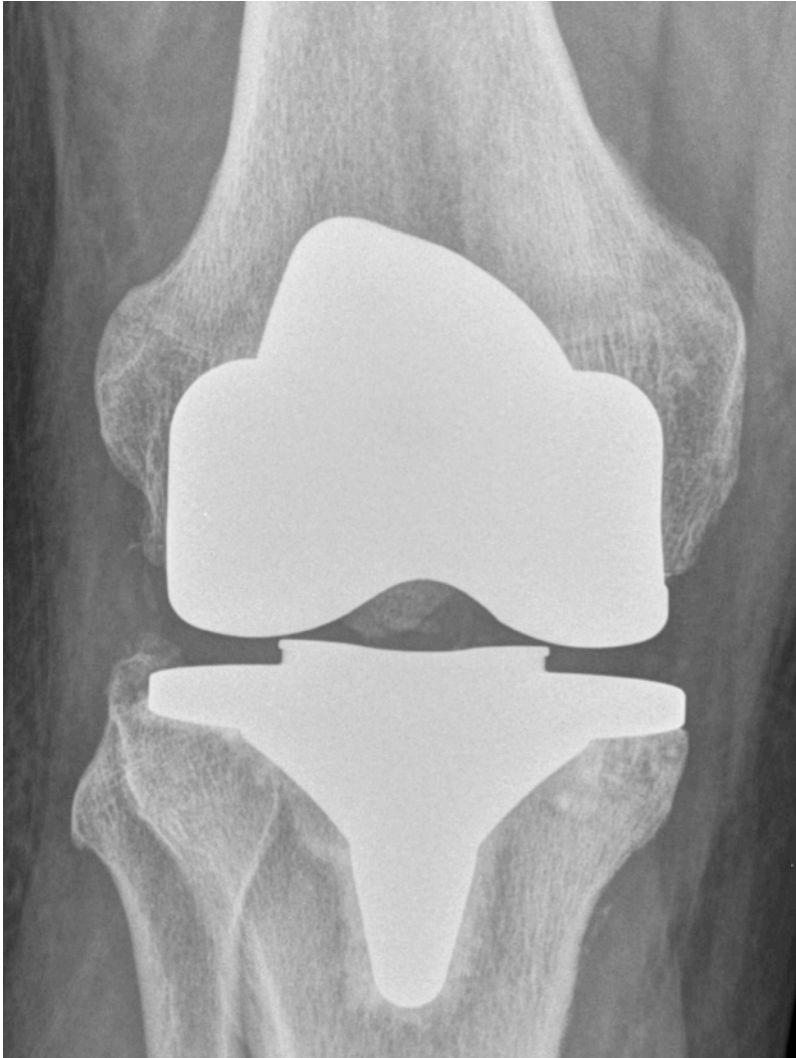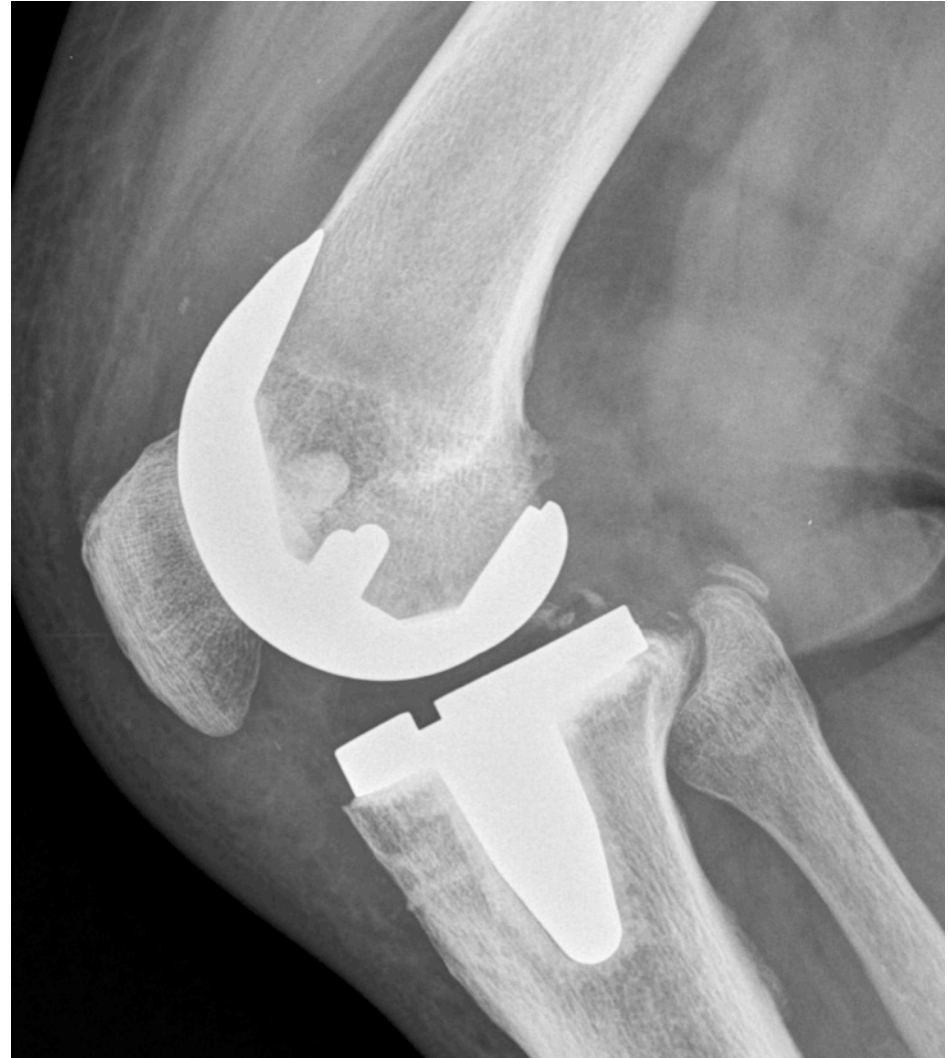

6 months postop

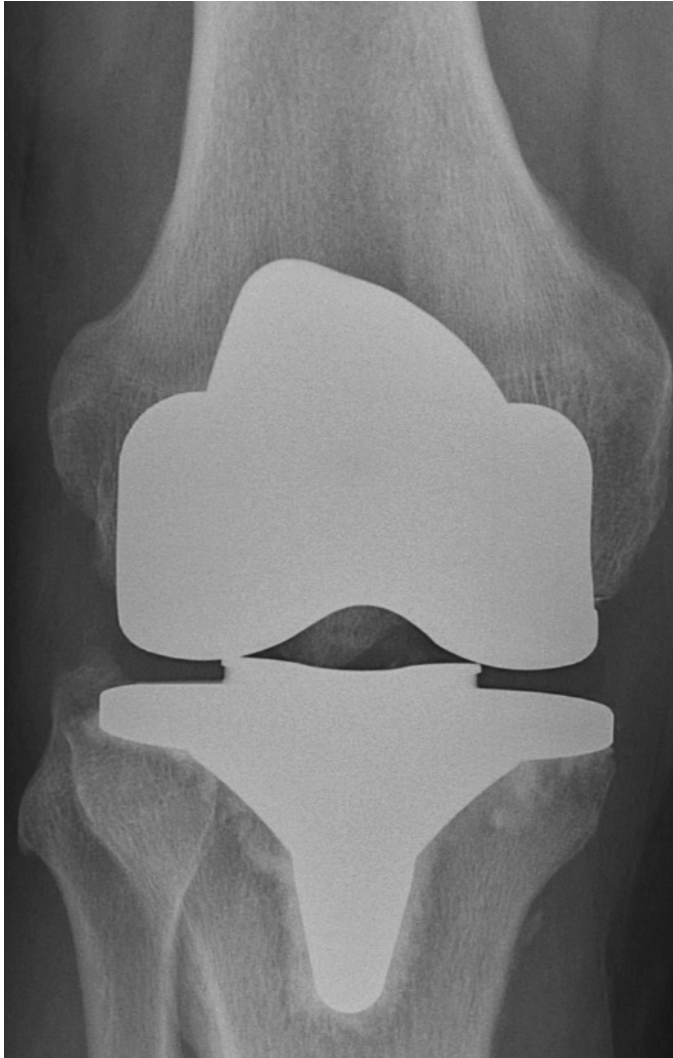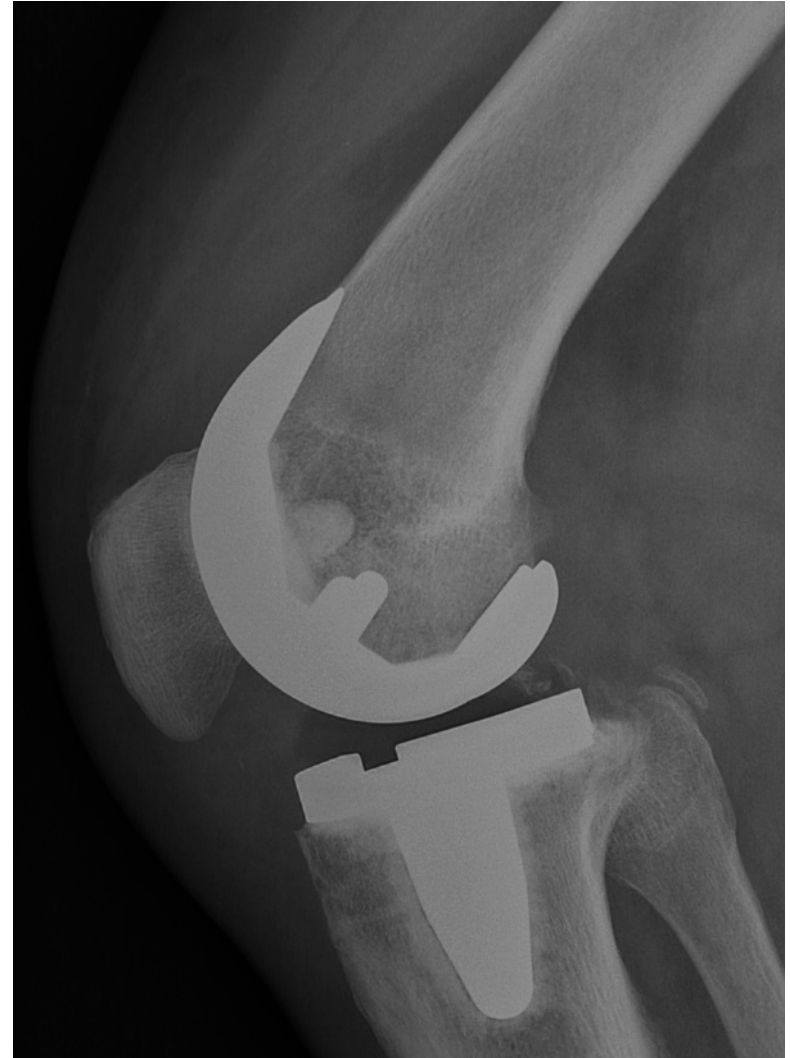

12 months postop

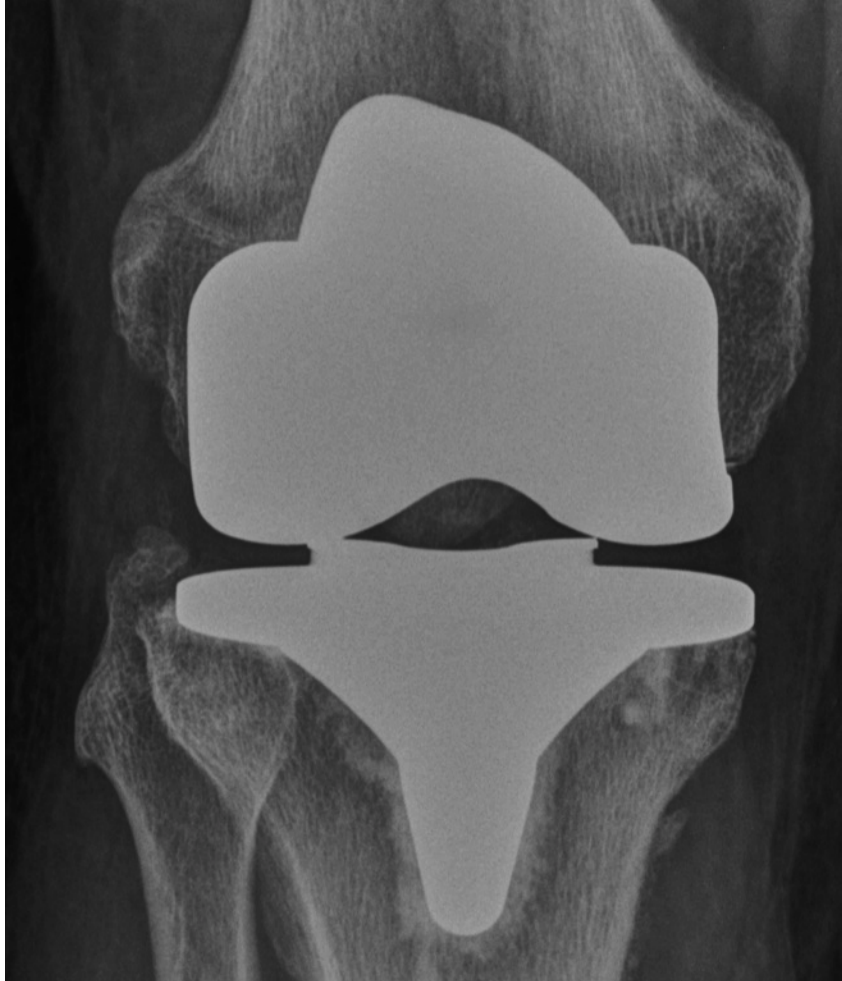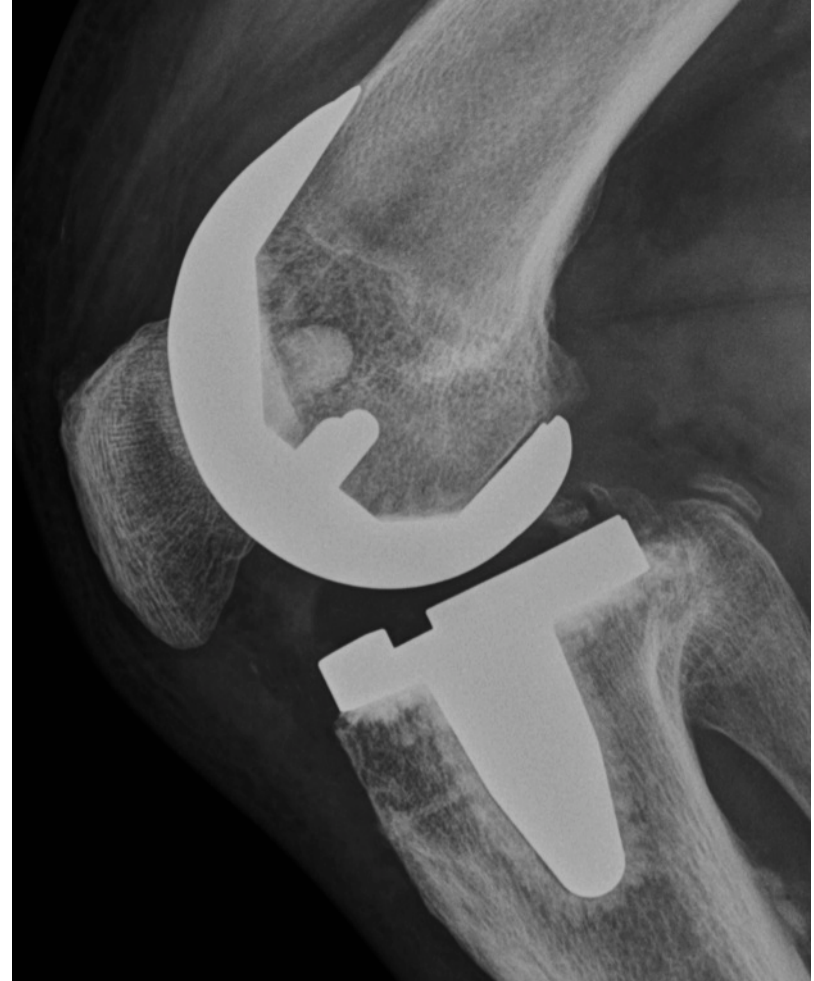

# Case 6

preoperative

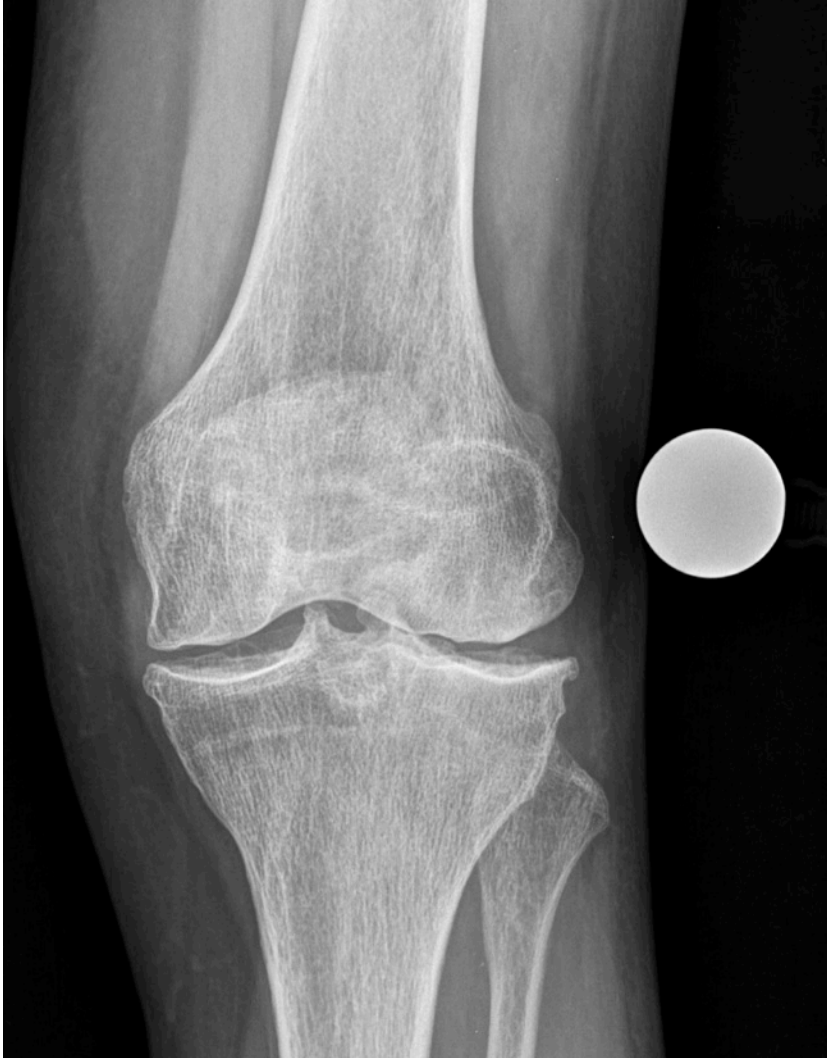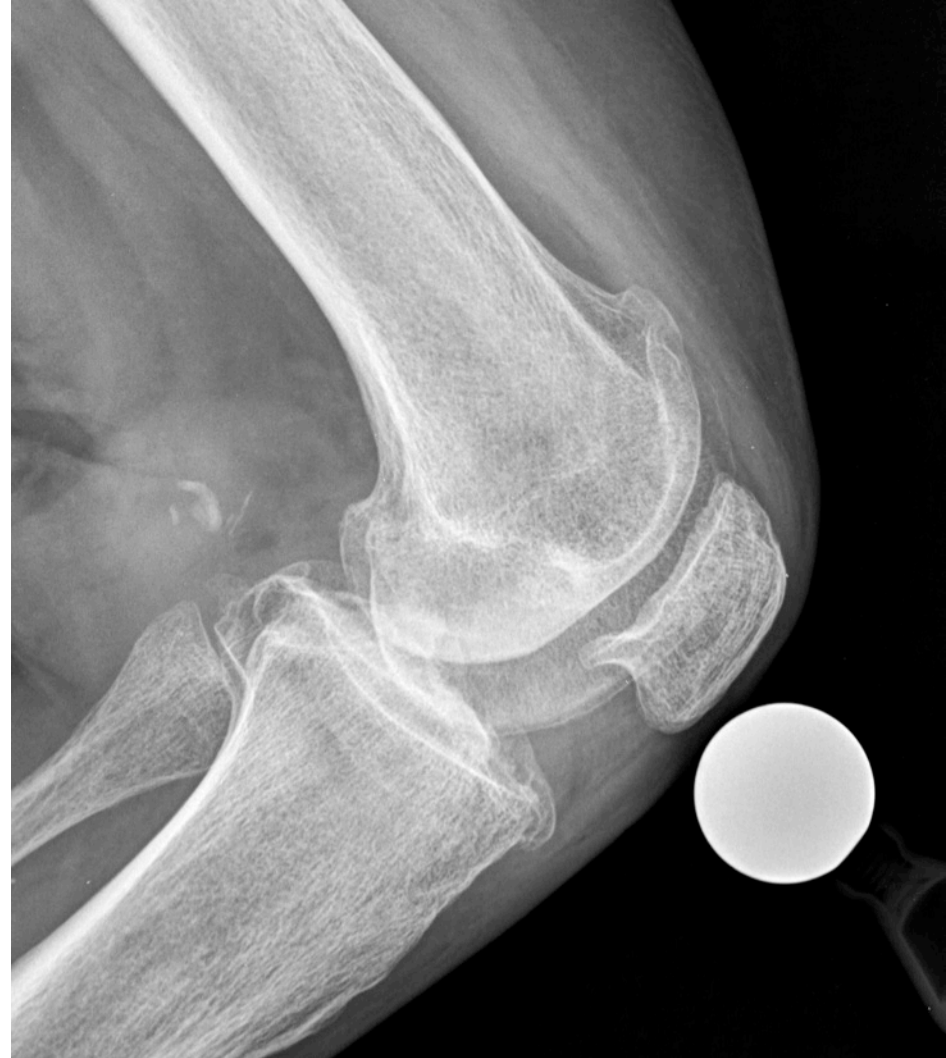



6 weeks postop

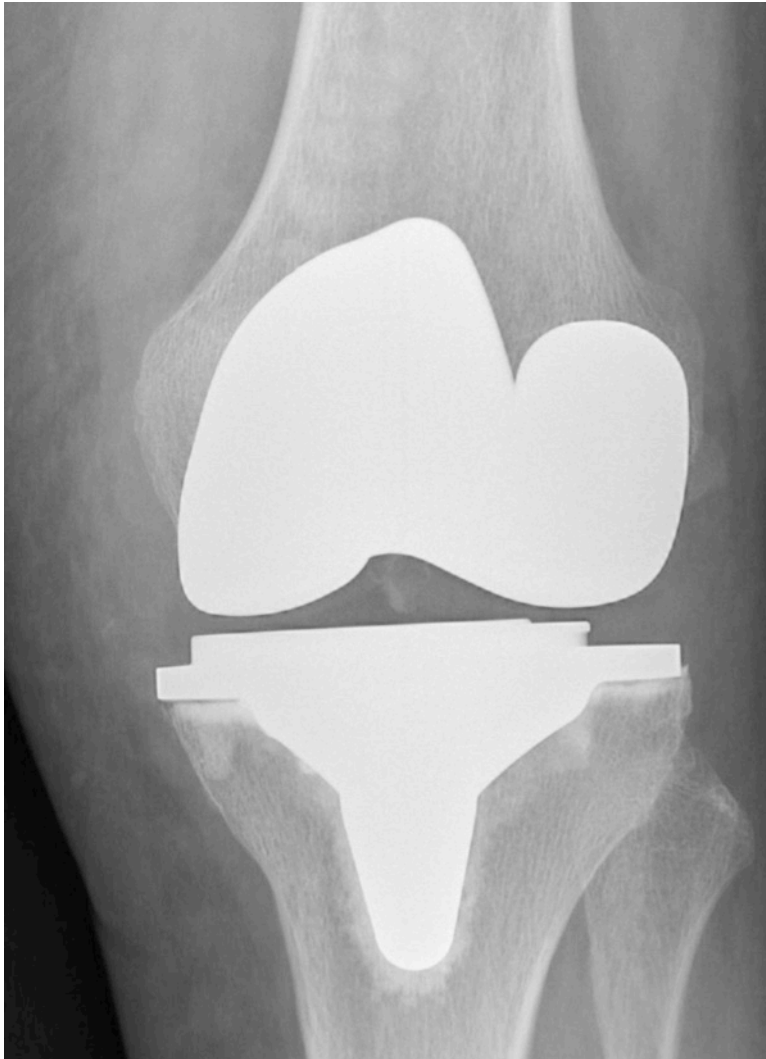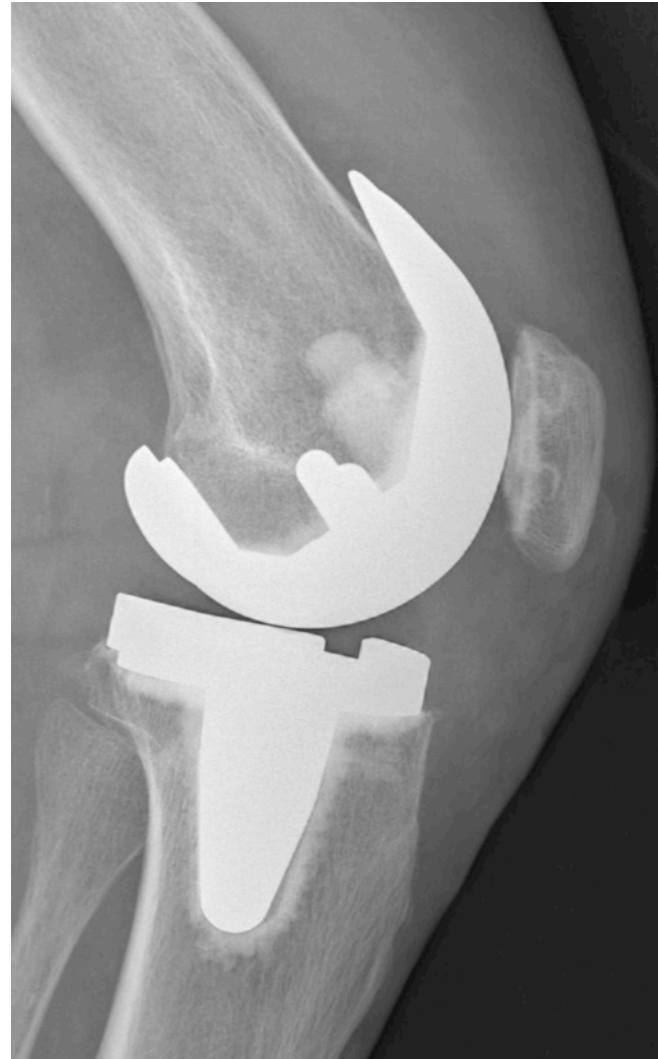



6 months postop

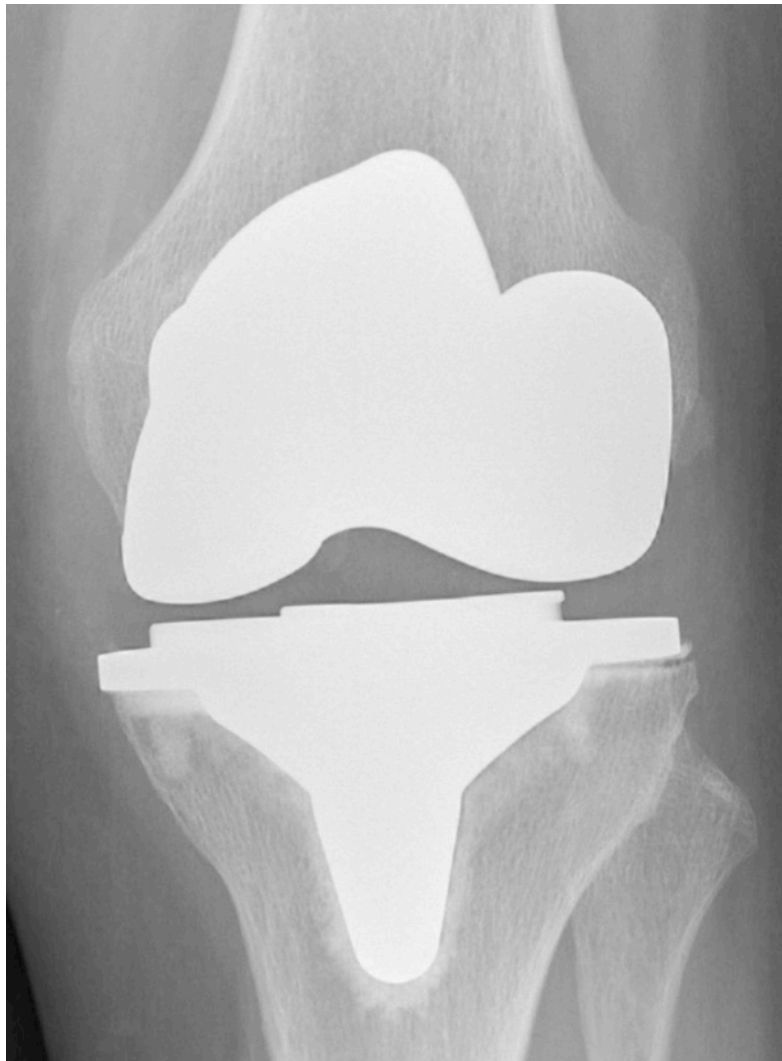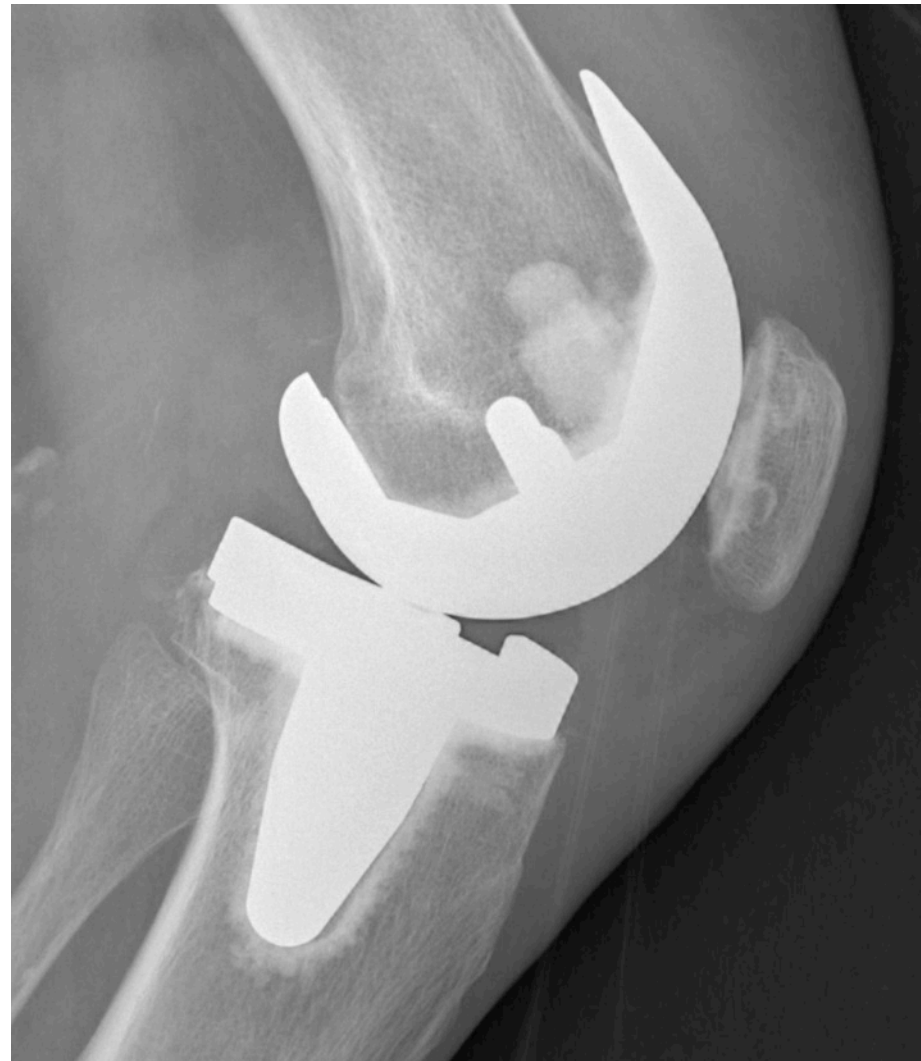

12 months postop

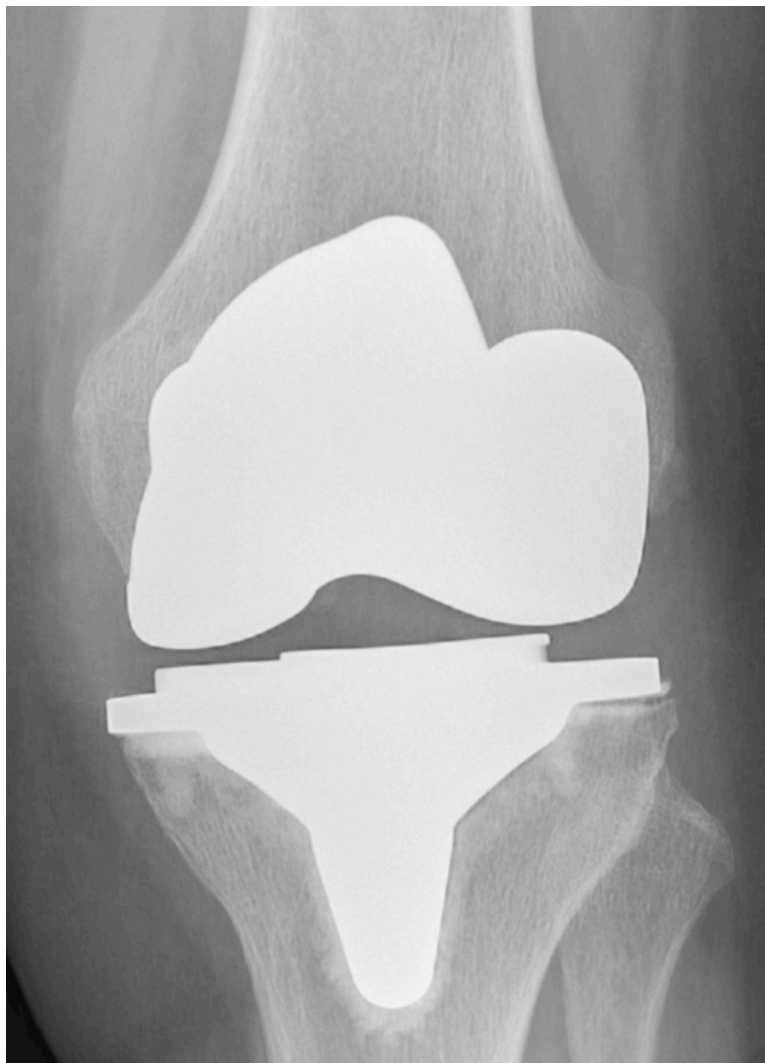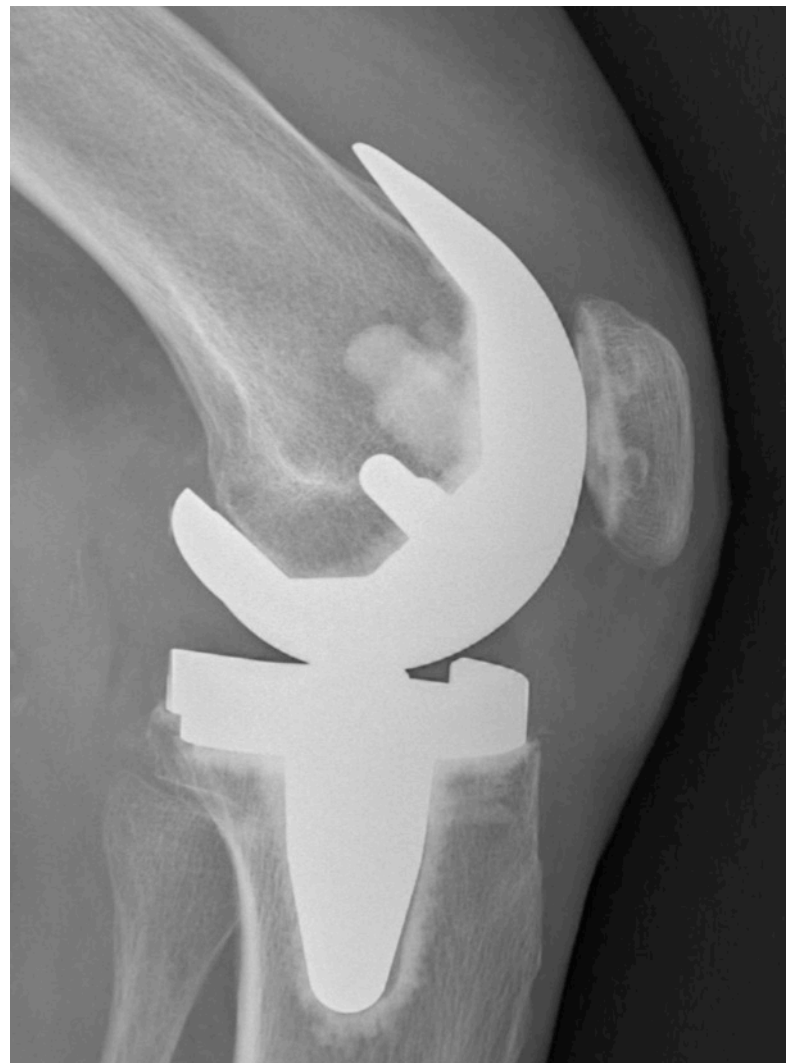

# Case 7

preoperative

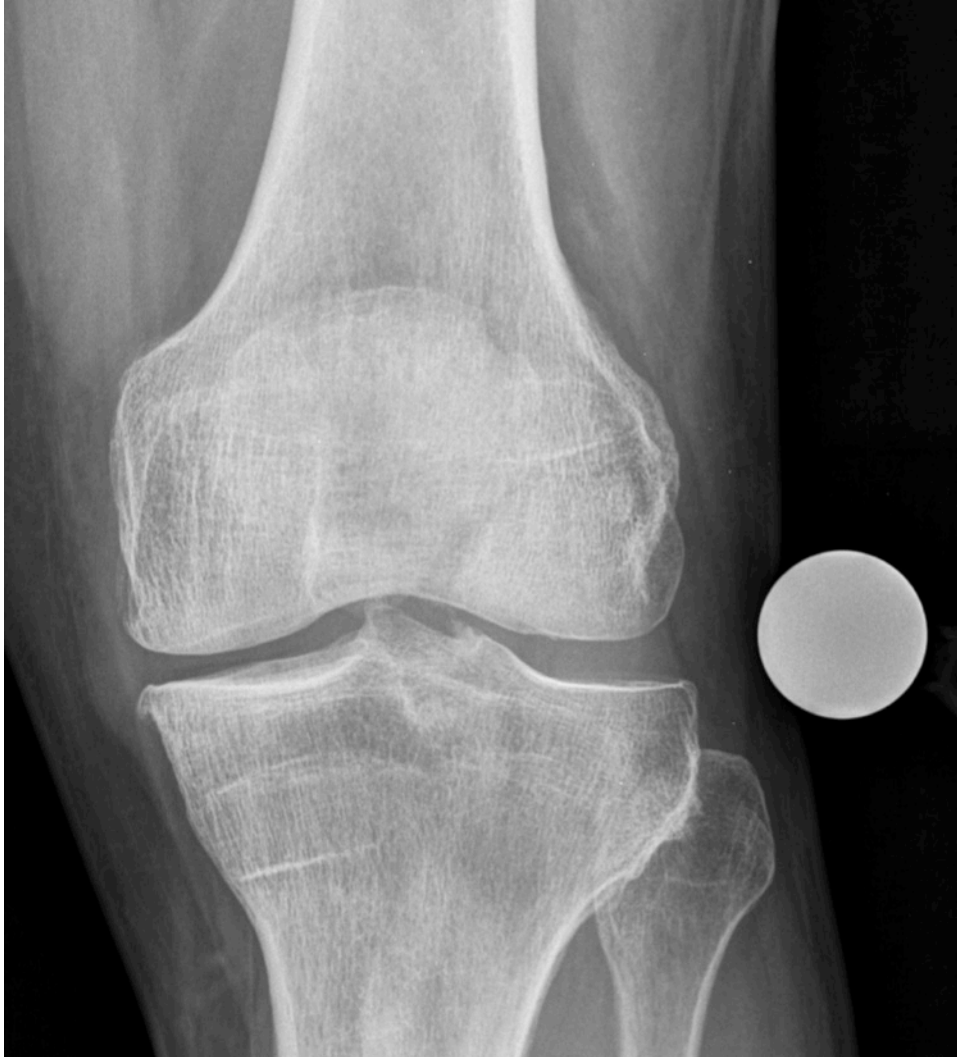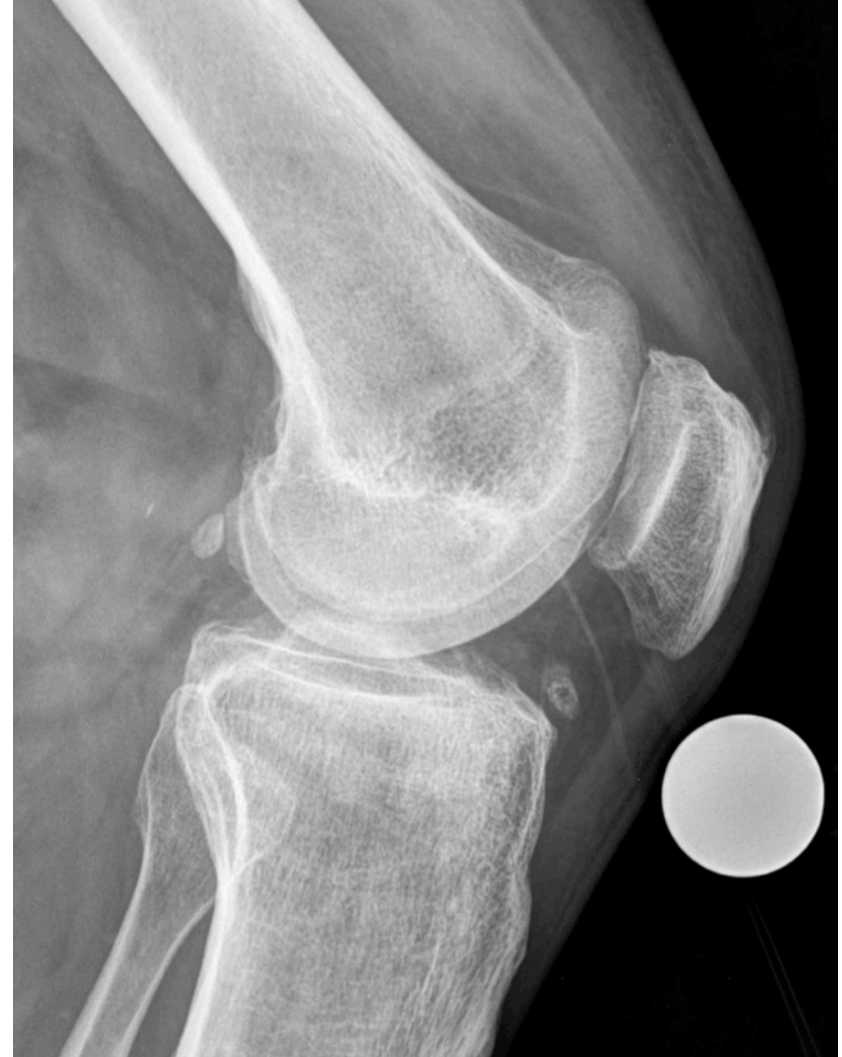

6 weeks postop

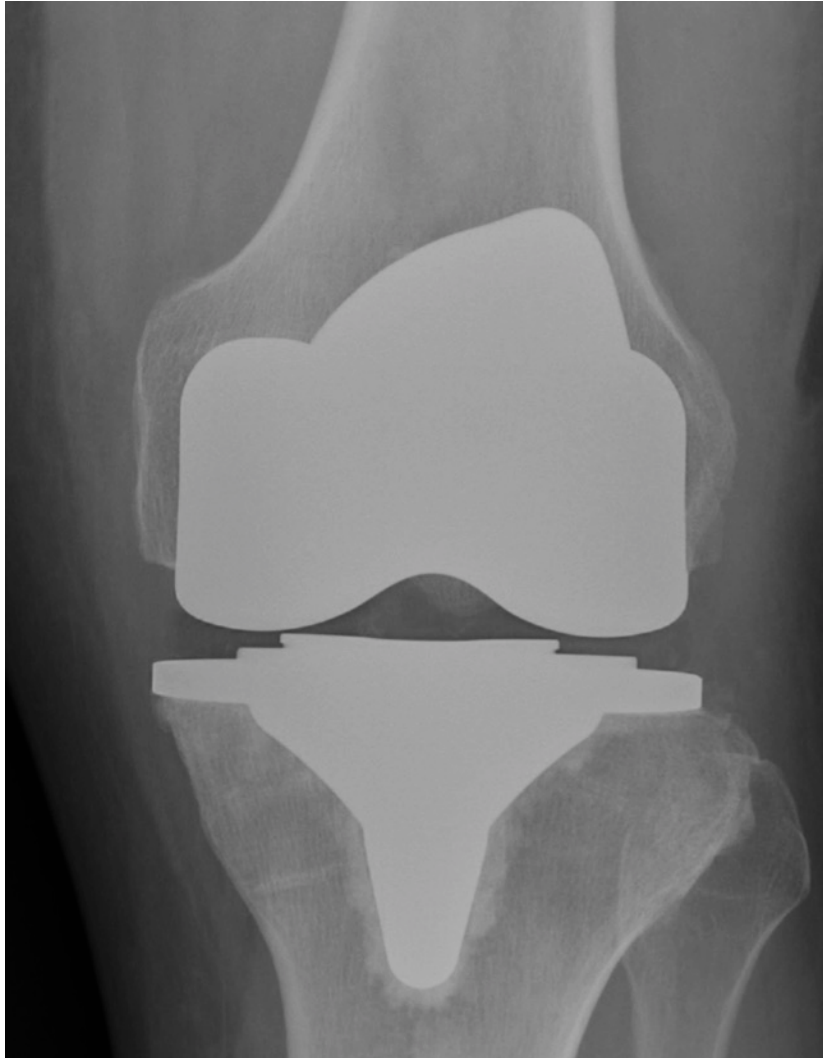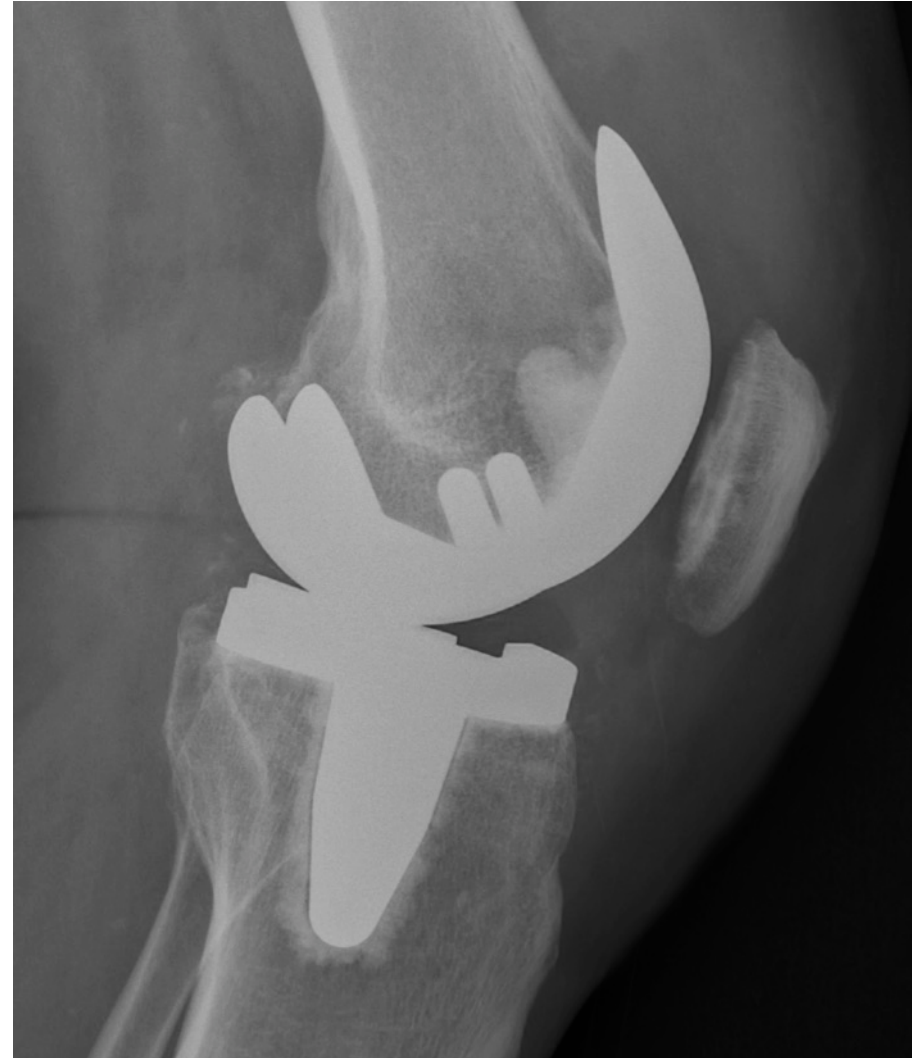

6 months postop

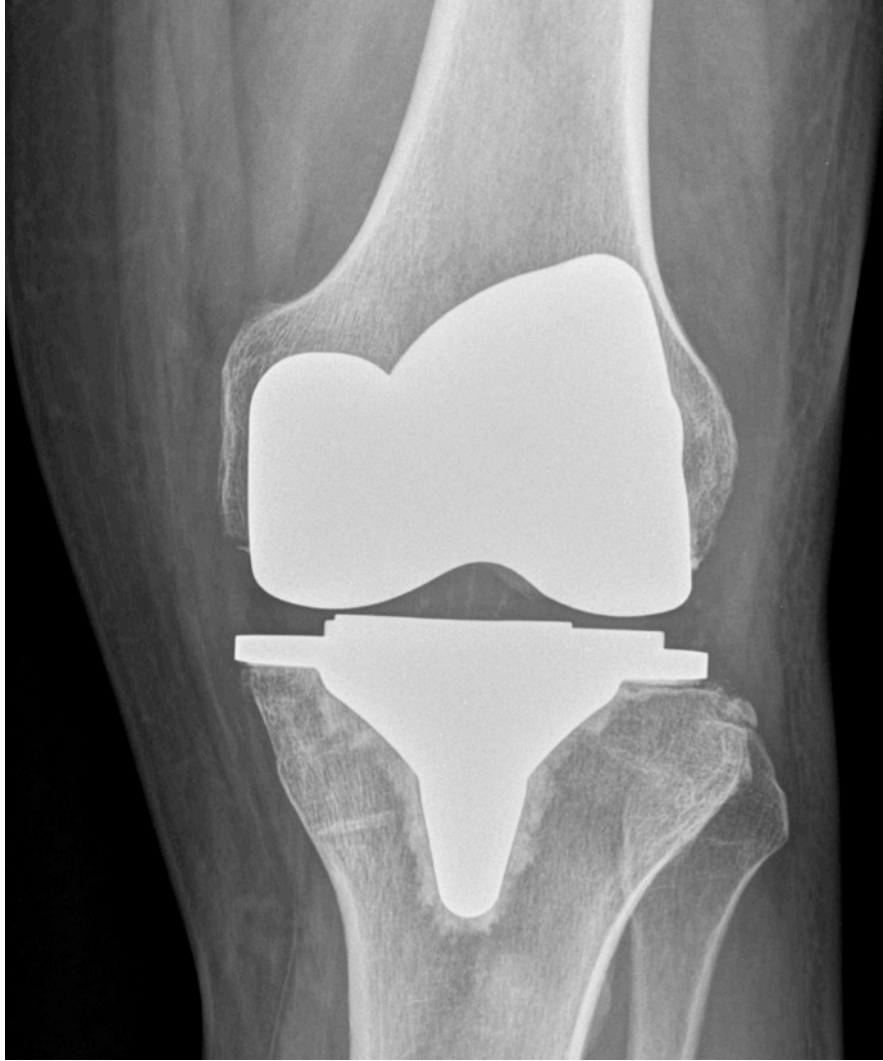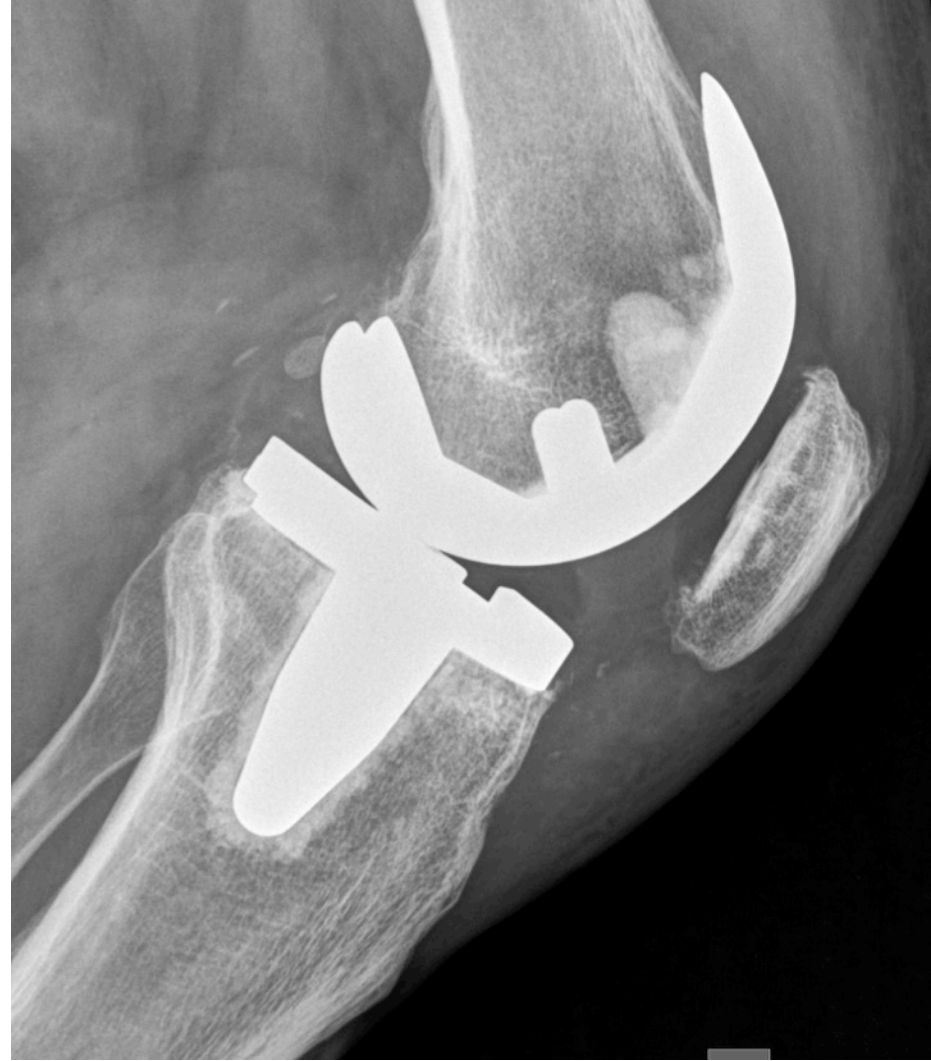

12 months postop

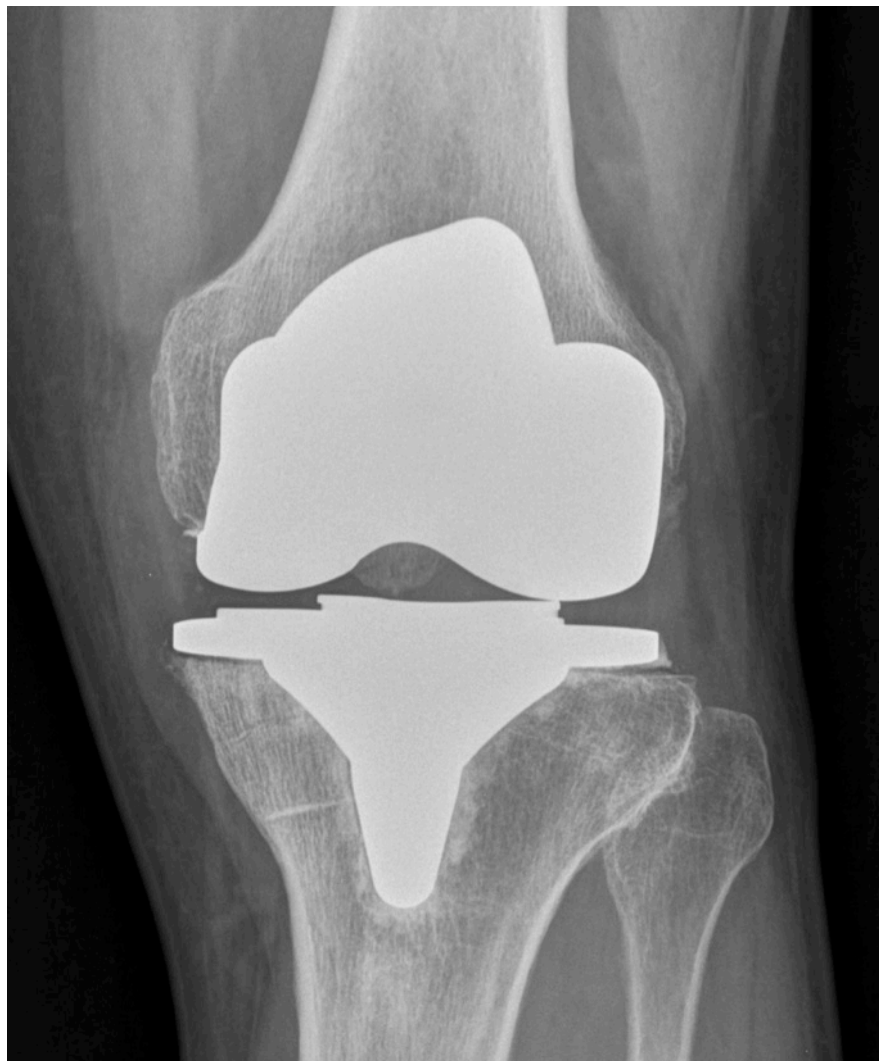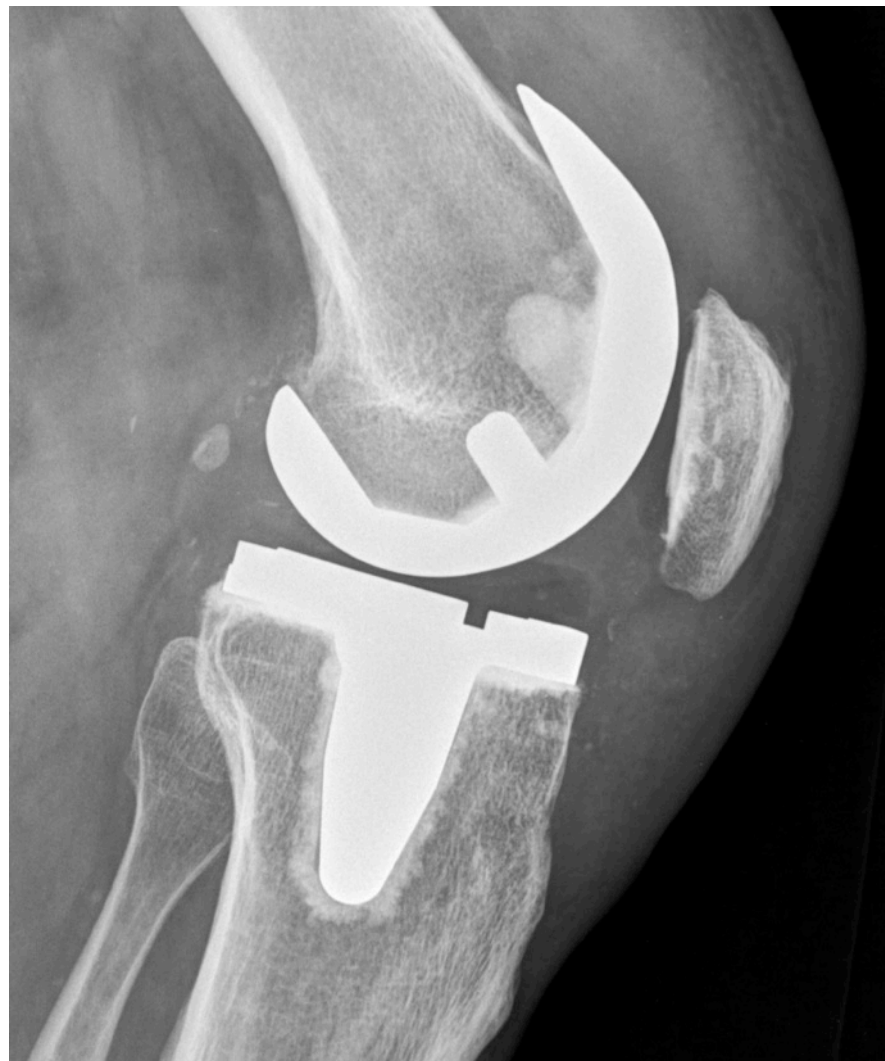

# Case 8



preoperative

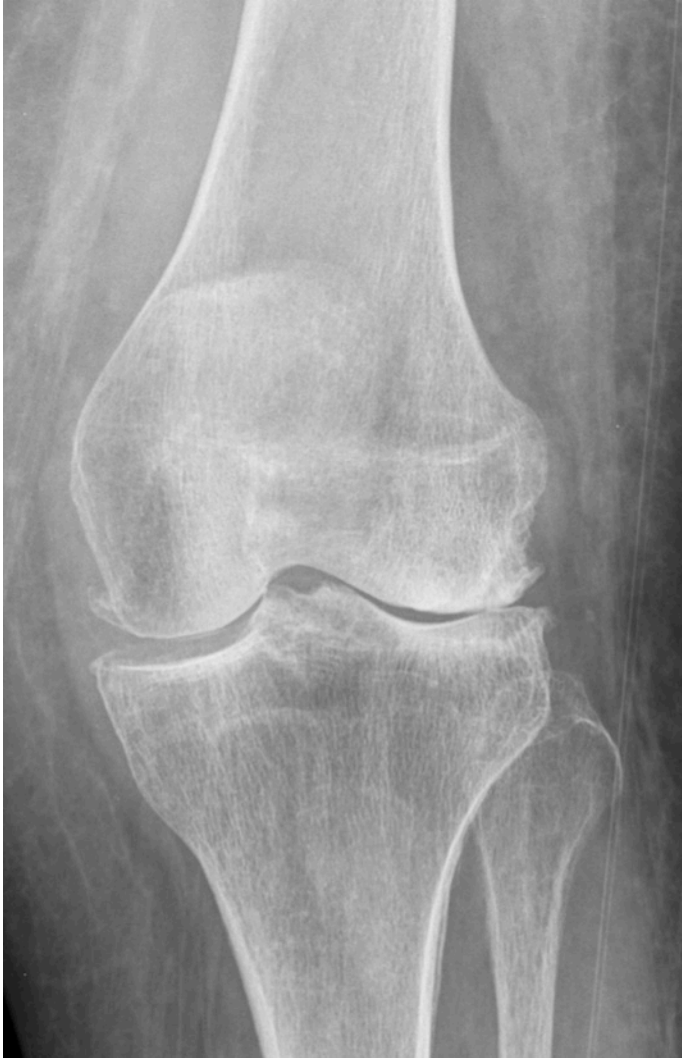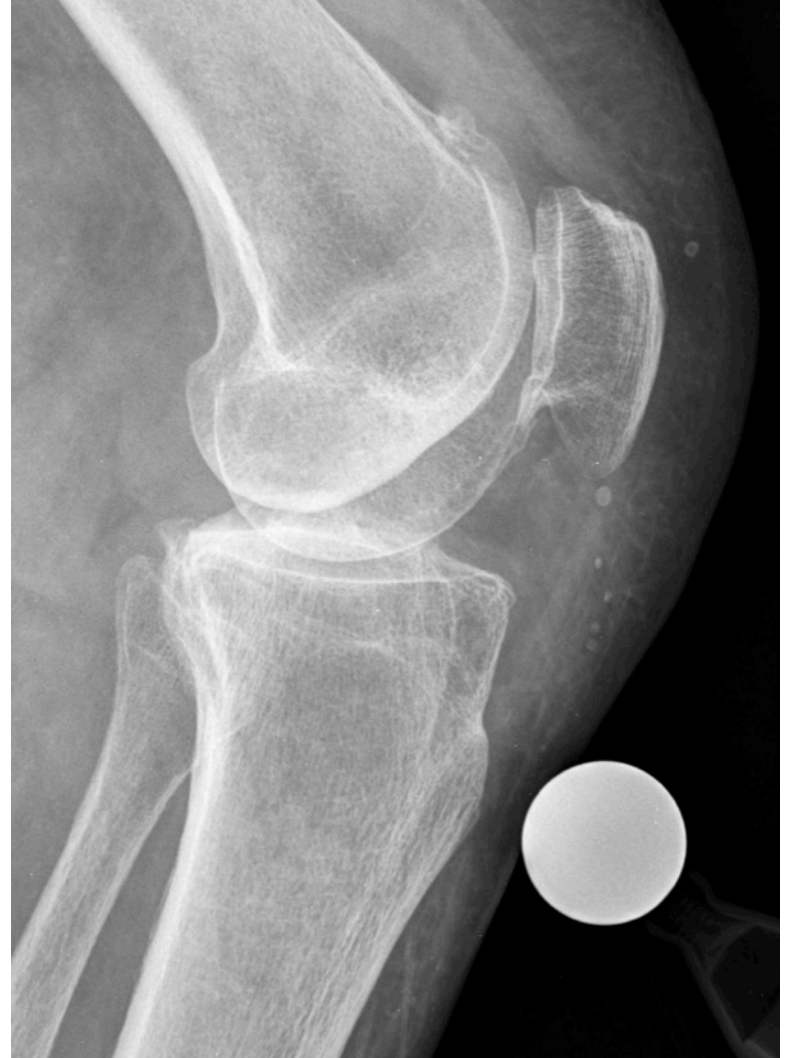

6 weeks postop

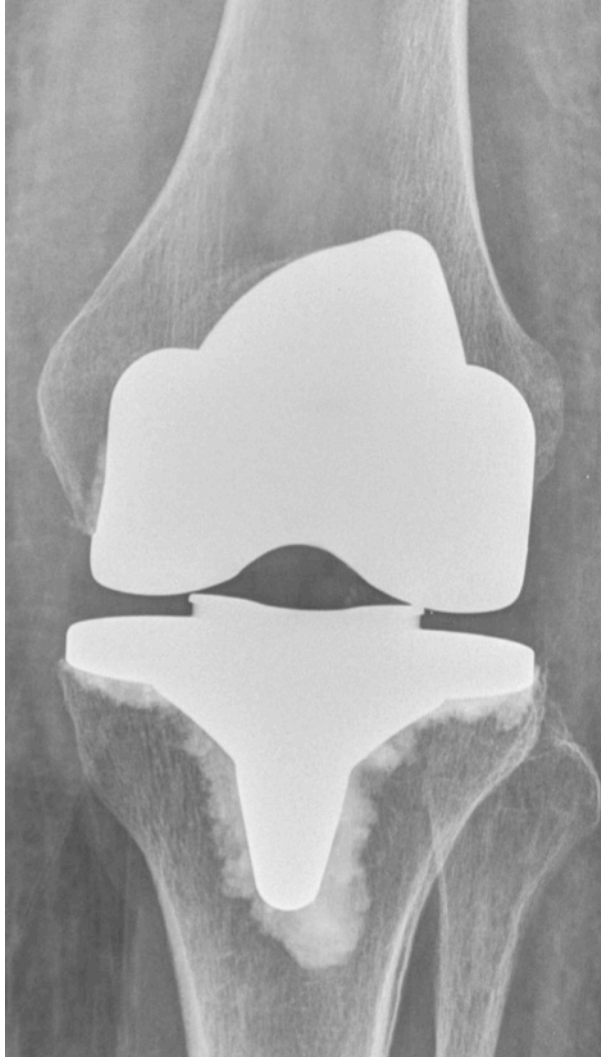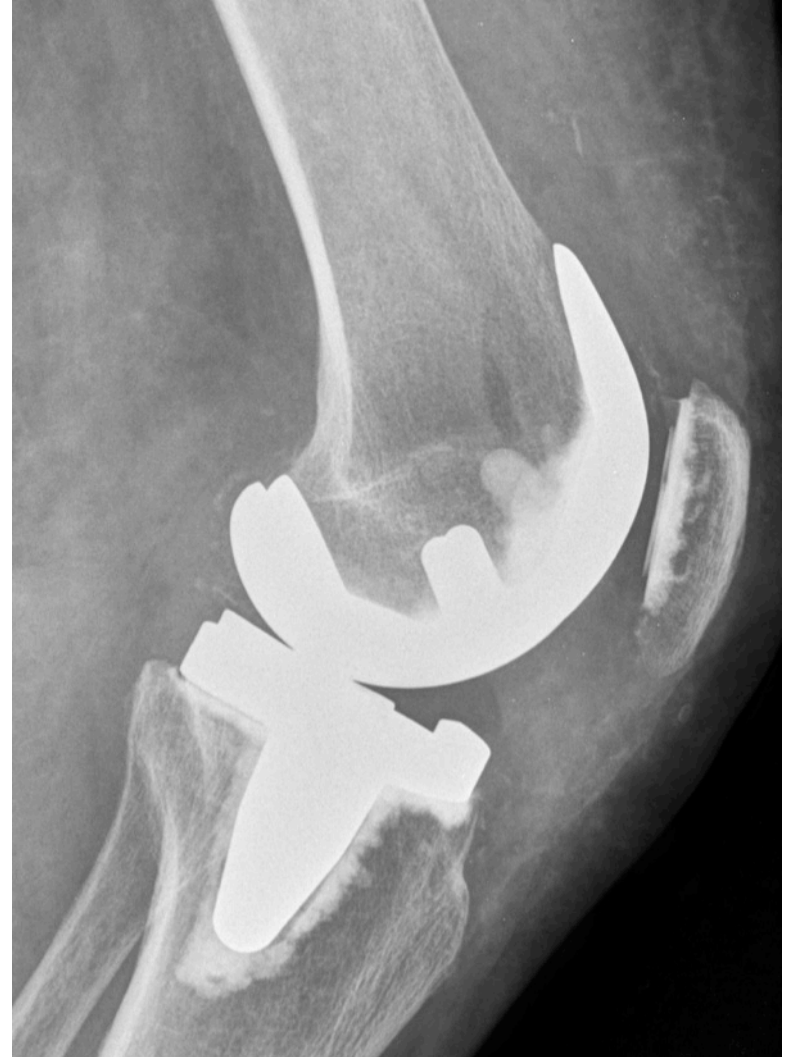

6 months postop

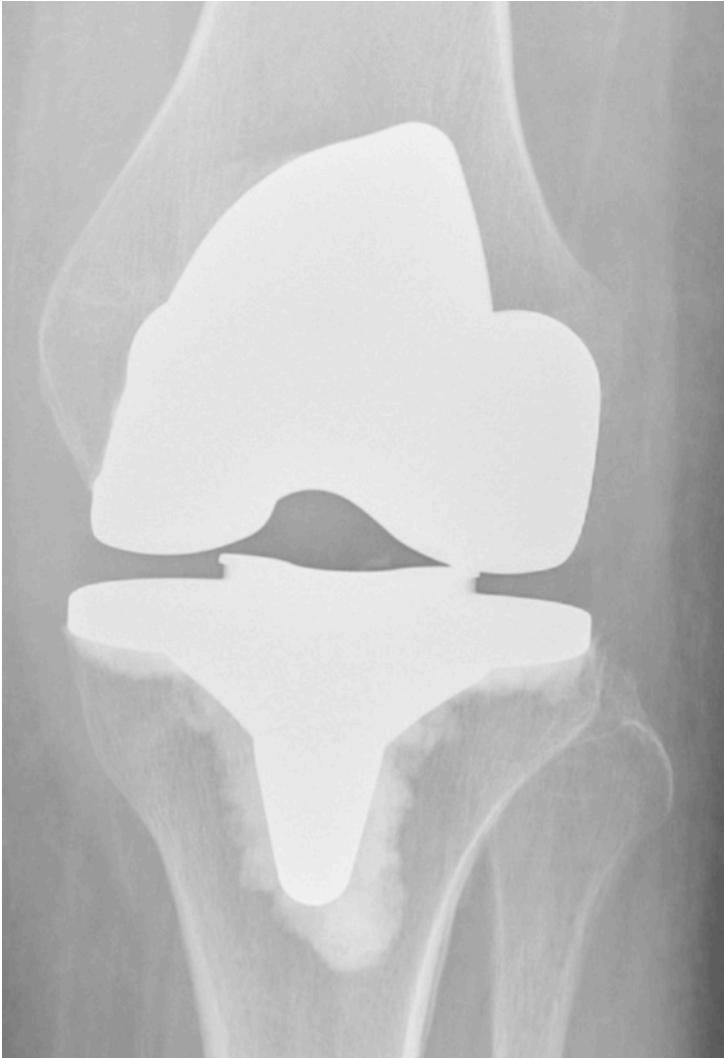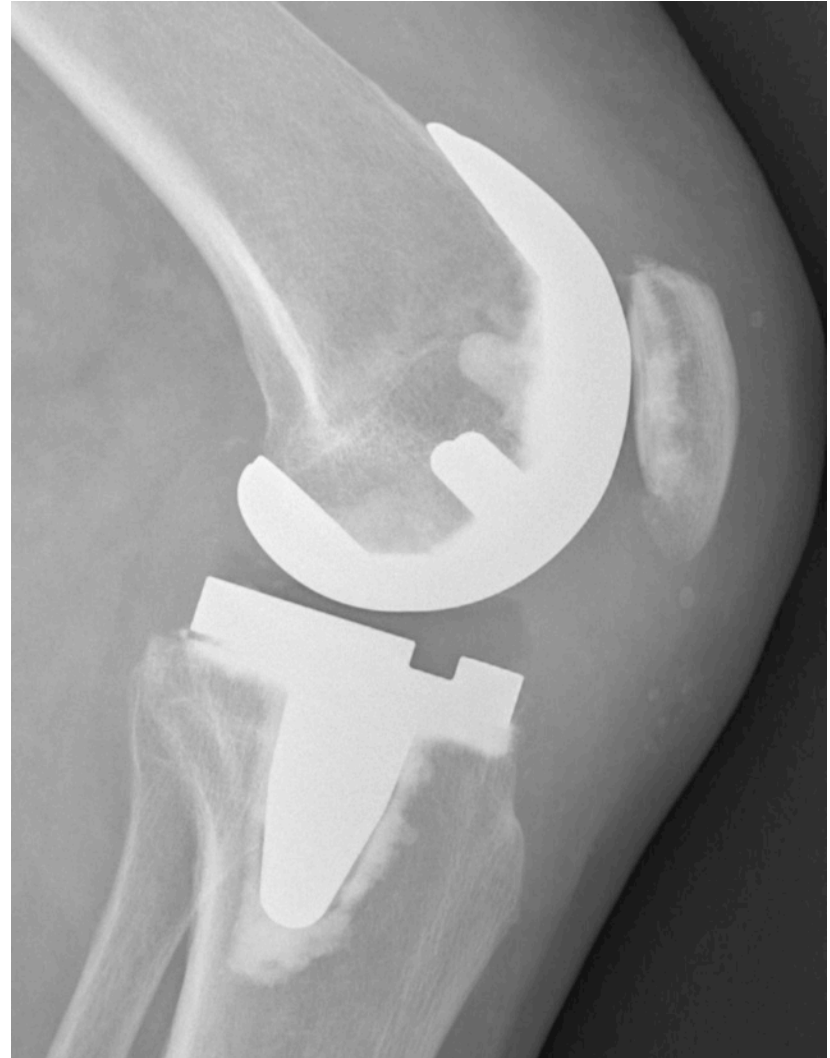

12 months postop

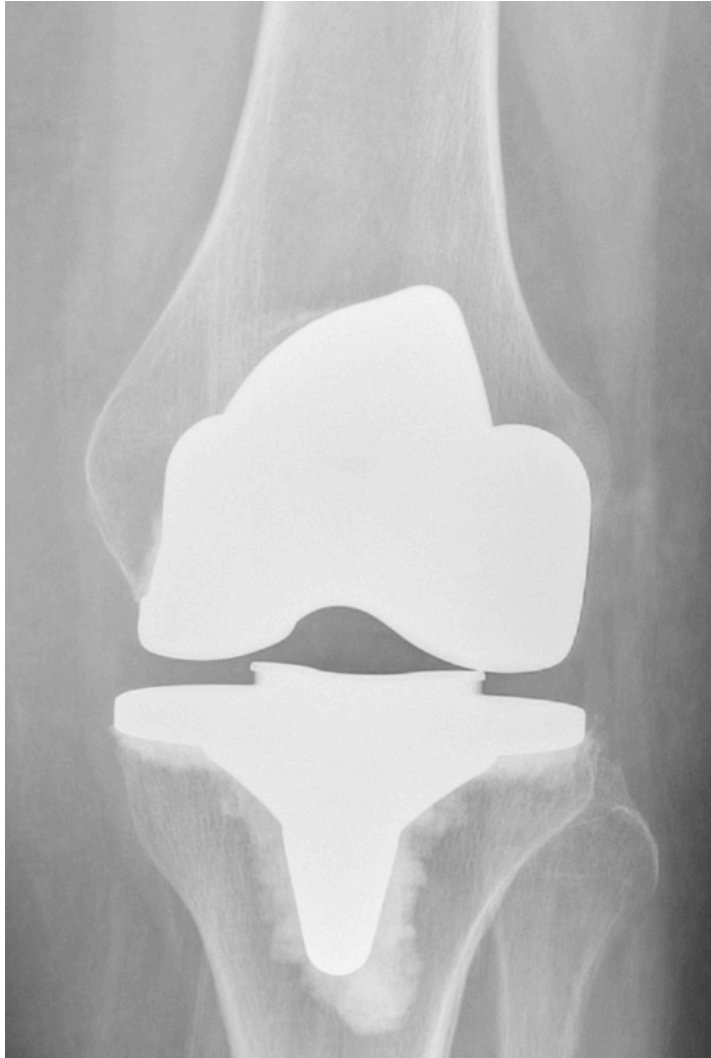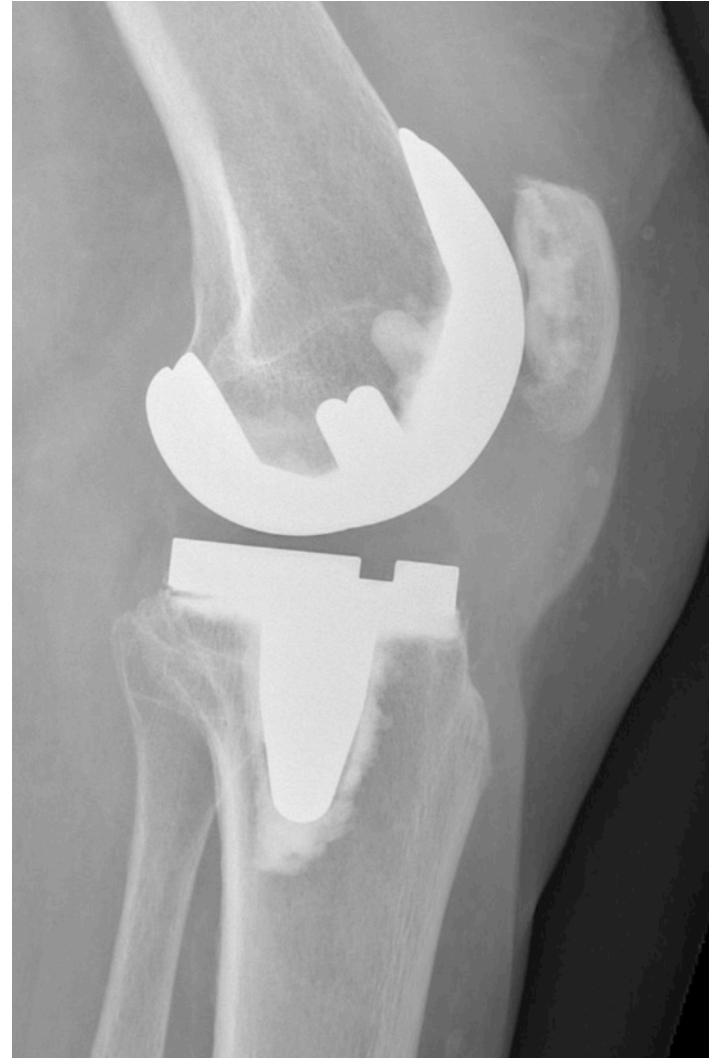

# Case 9

preoperative

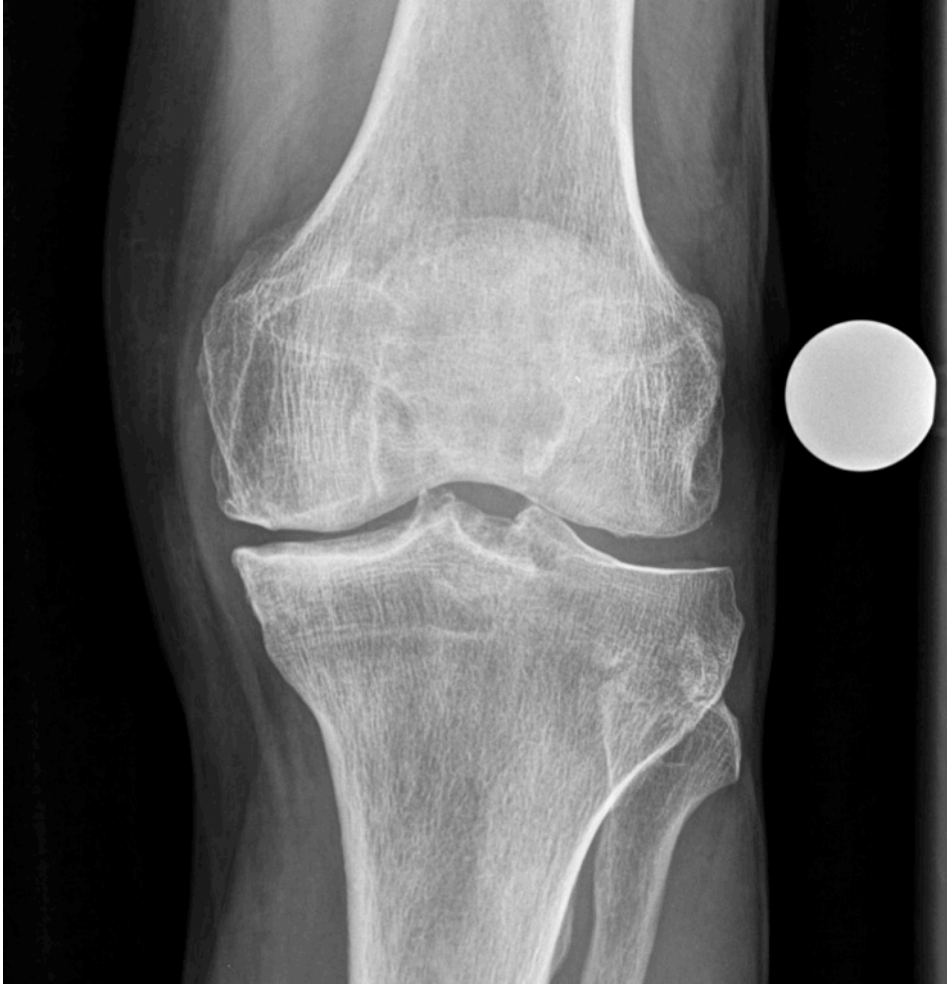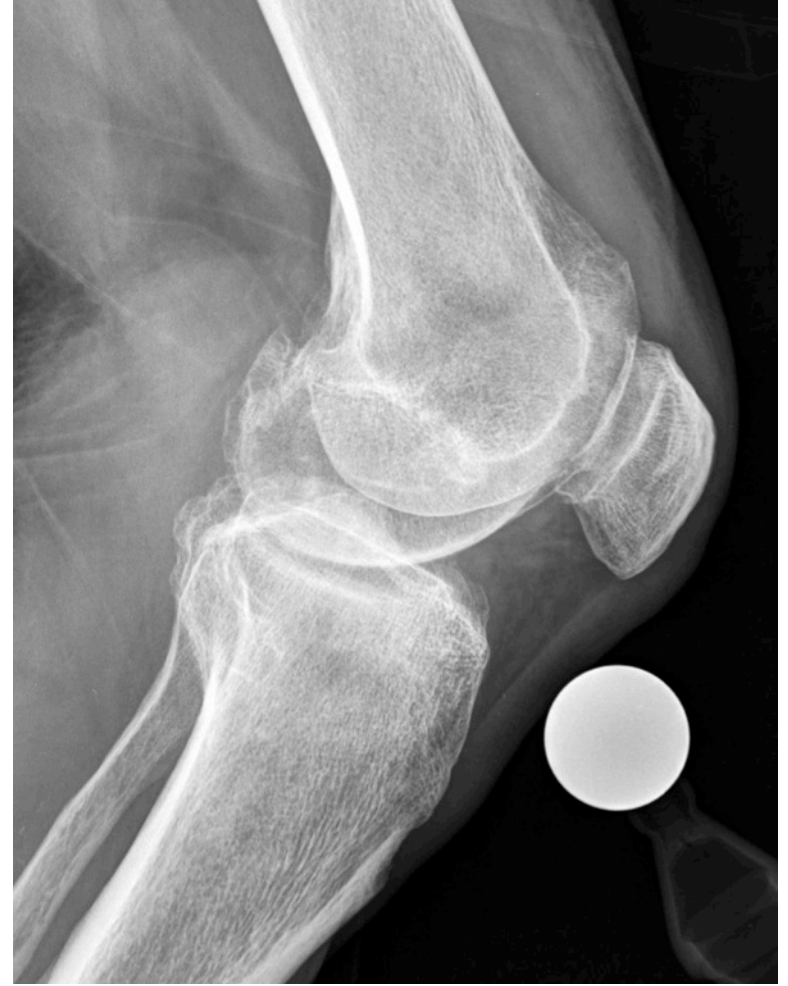

6 weeks postop

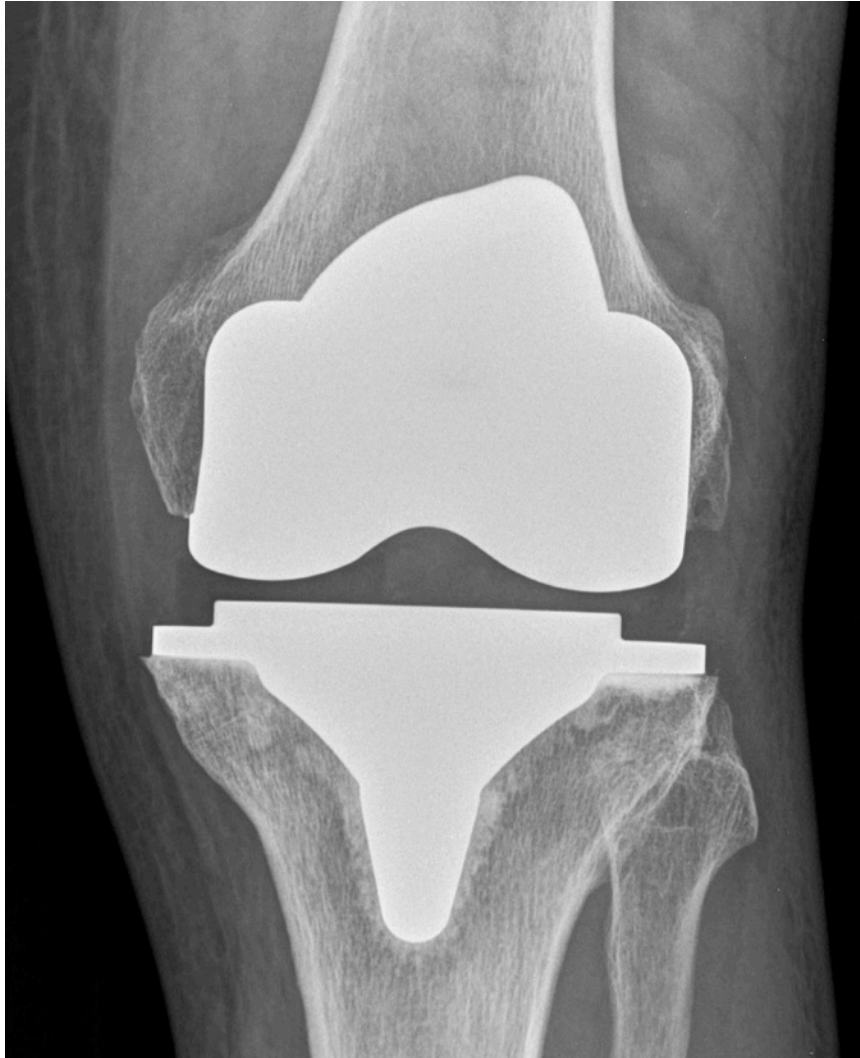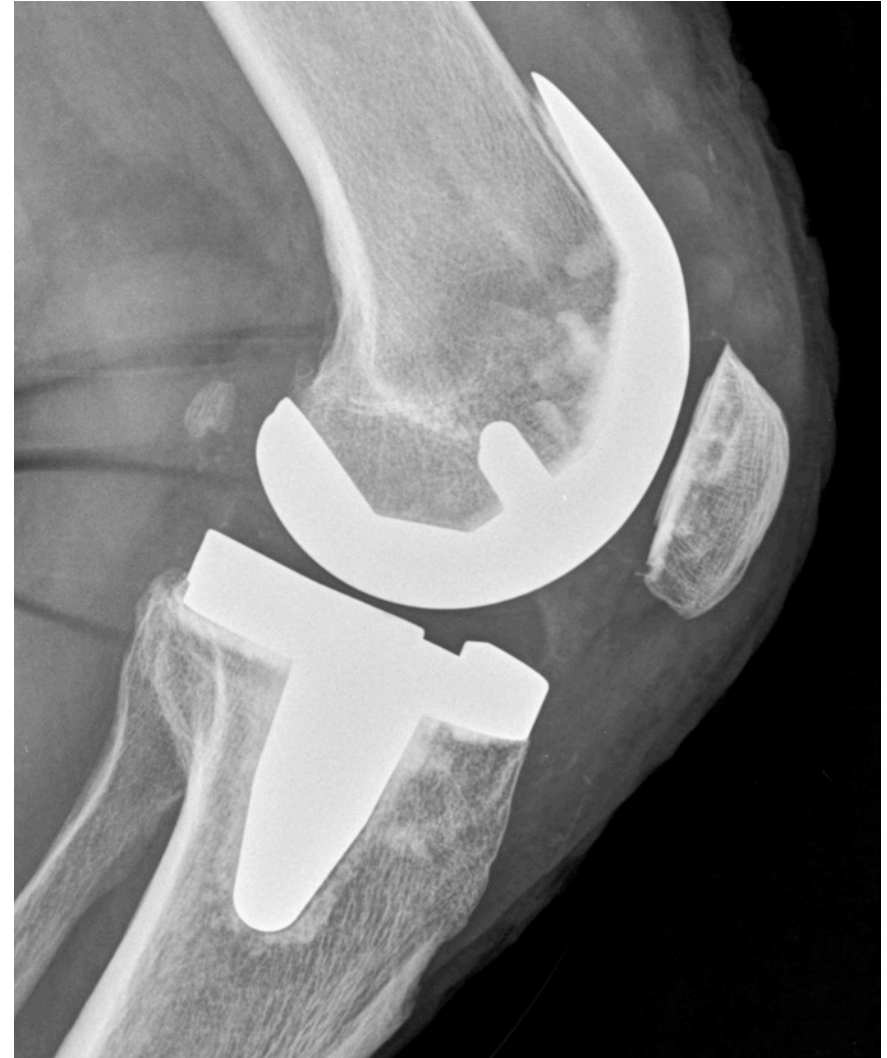

6 months postop

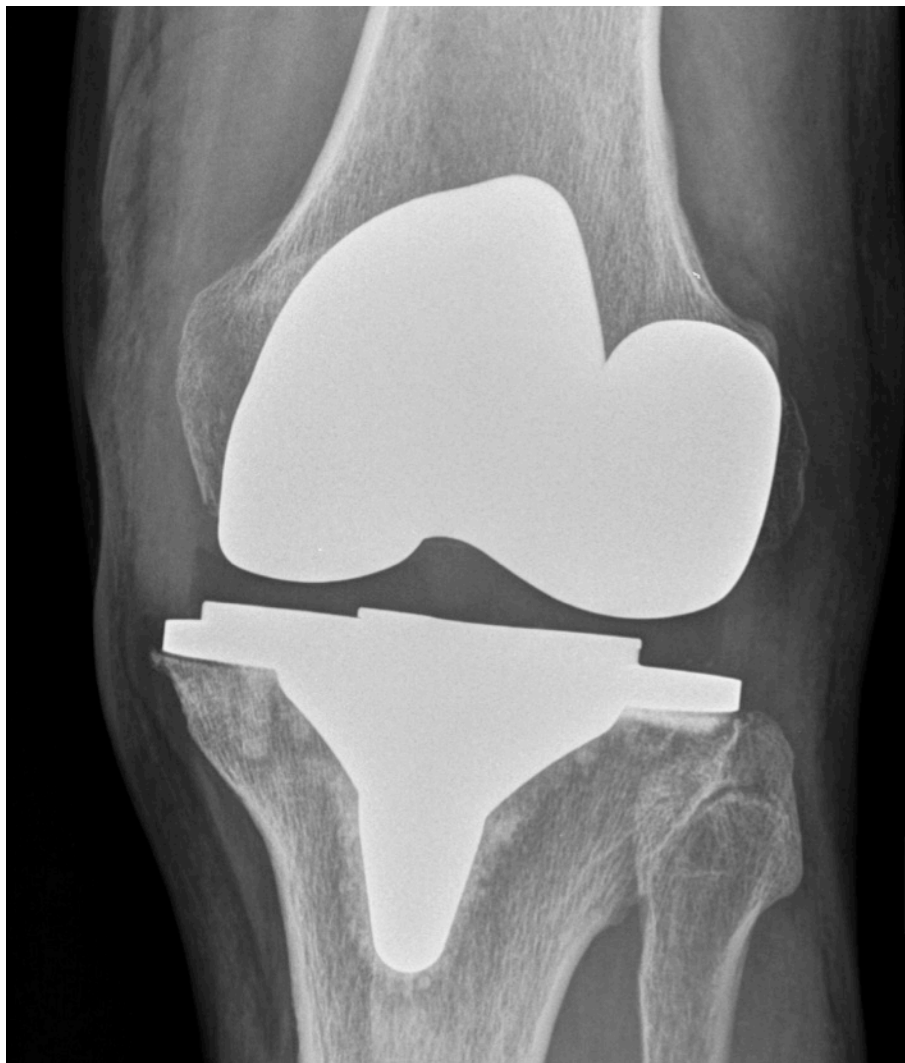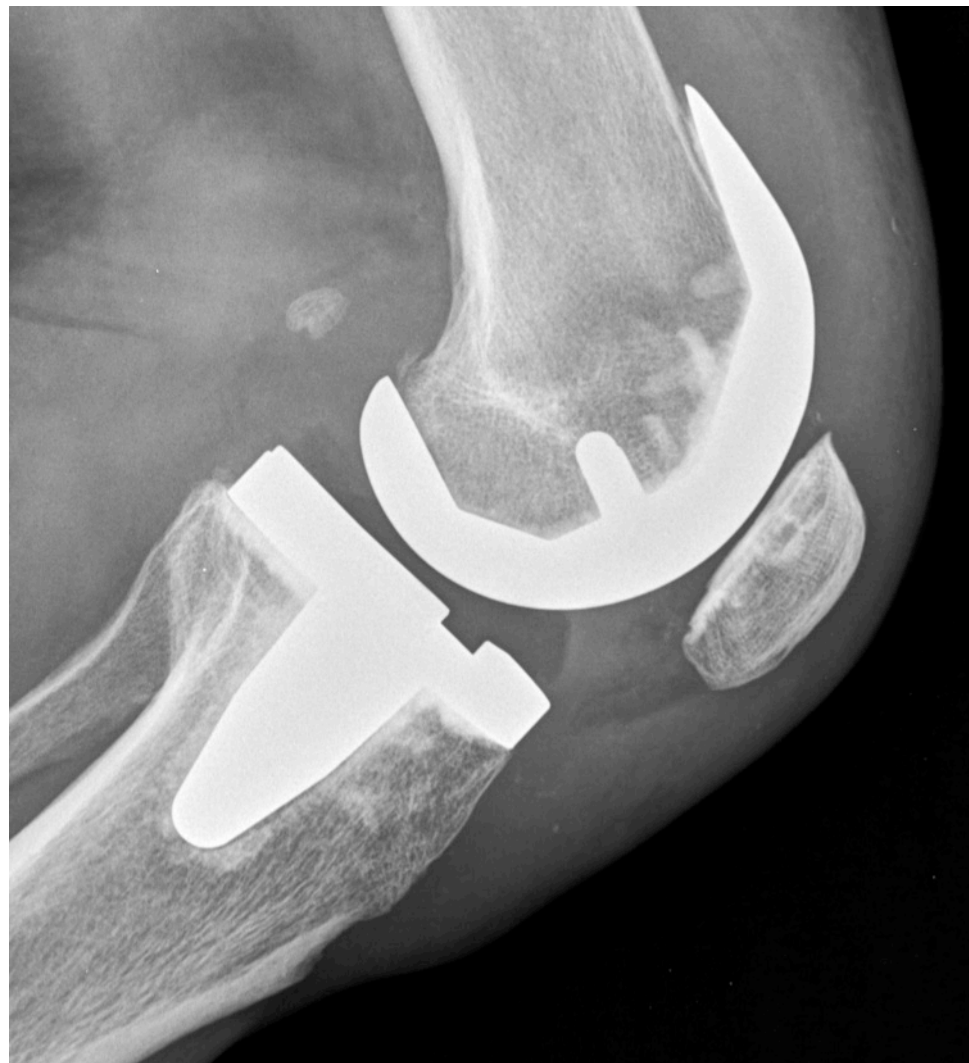



12 months postop

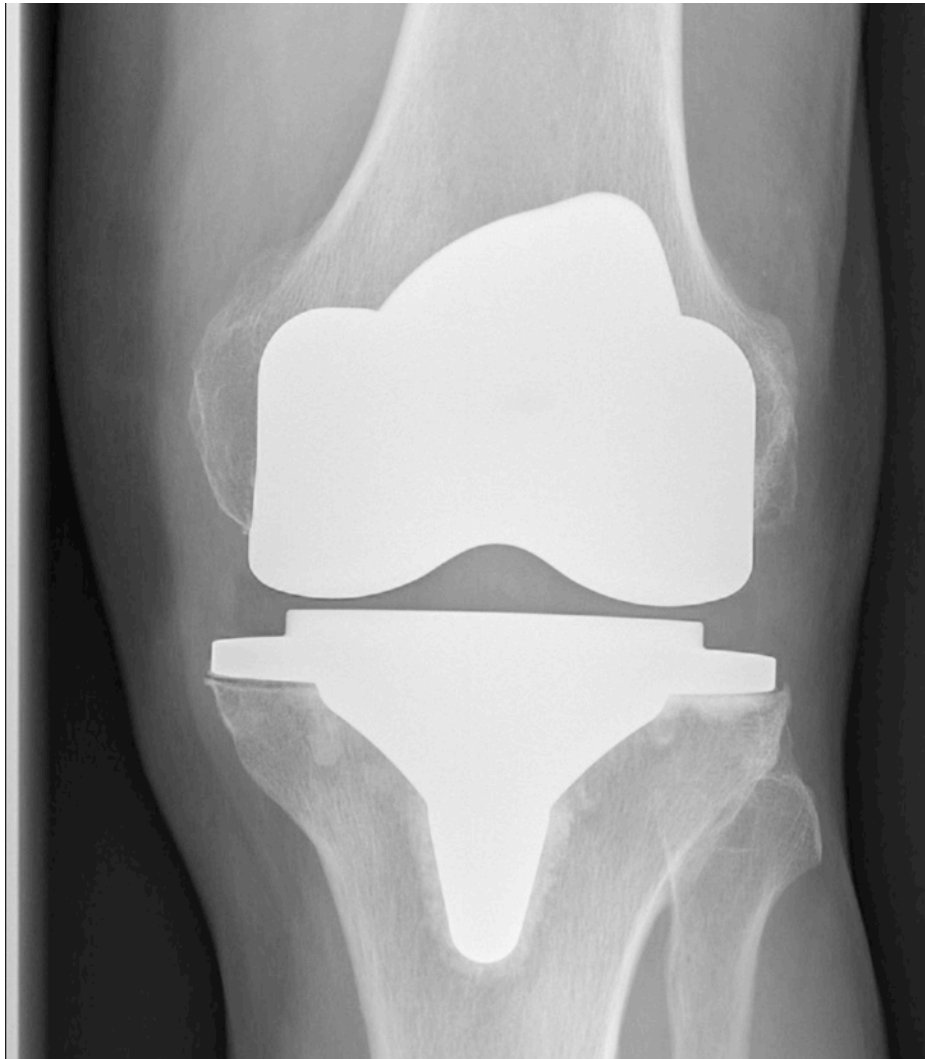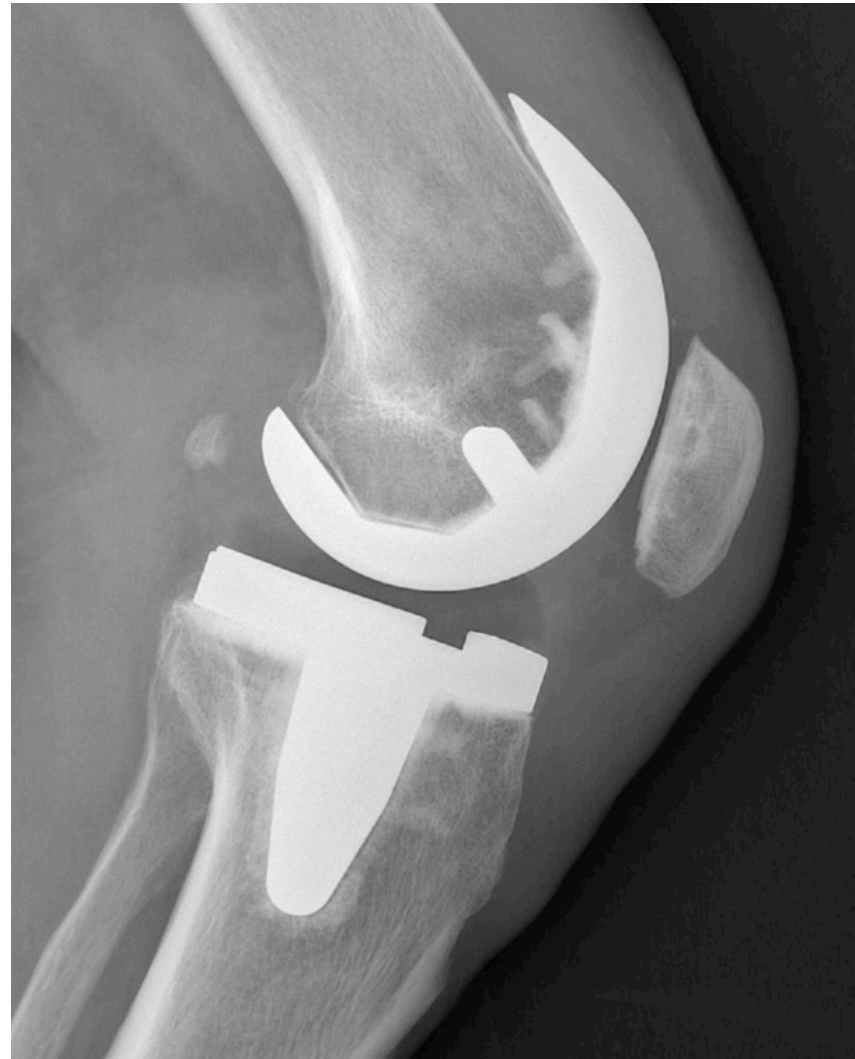

# Case 10

preoperative

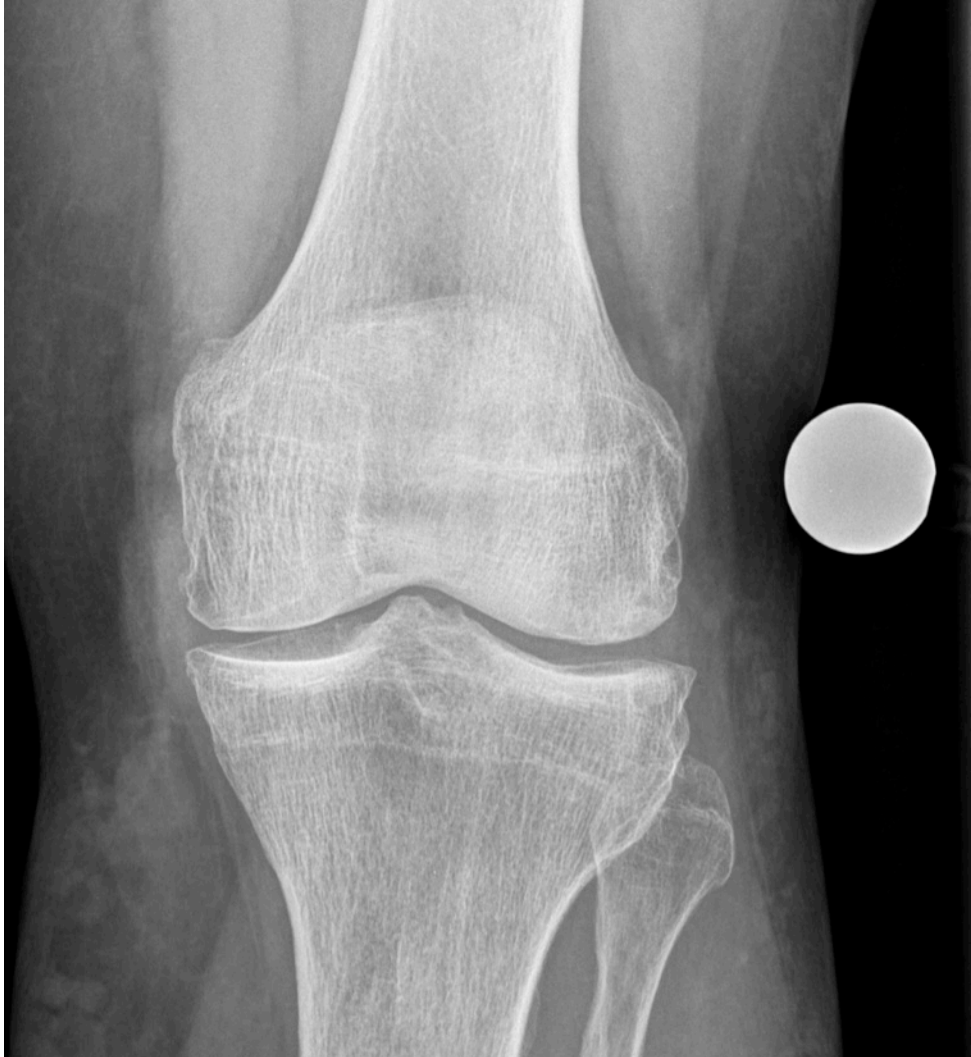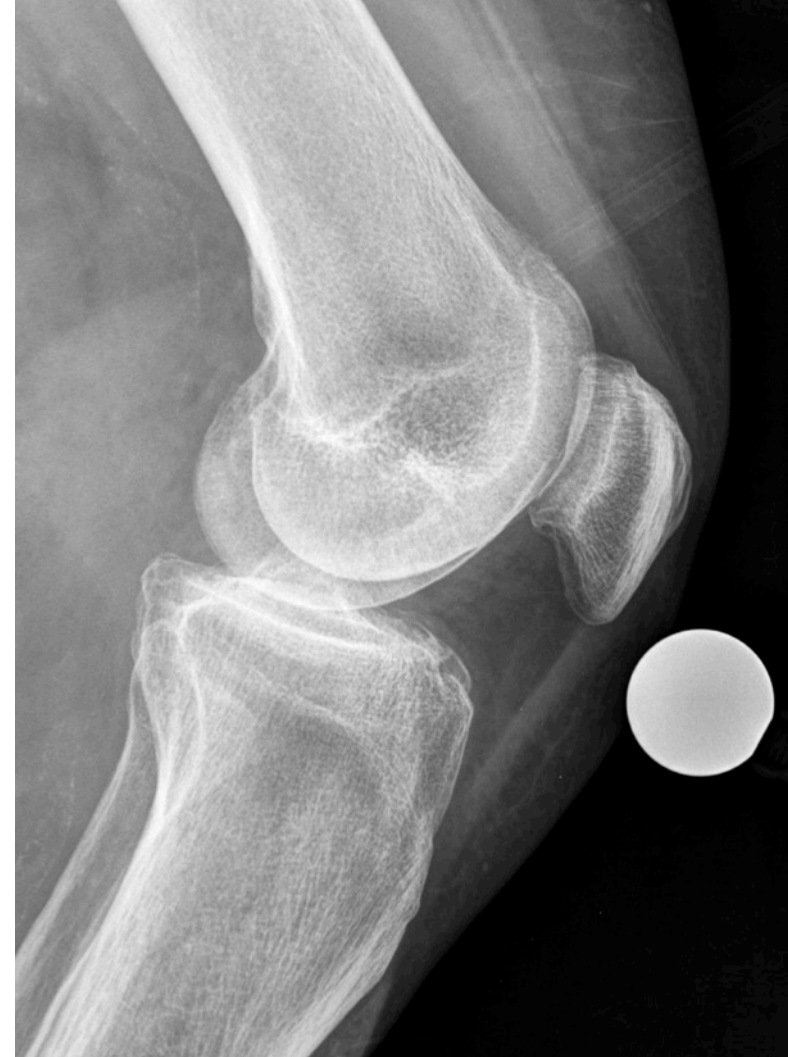

6 weeks postop

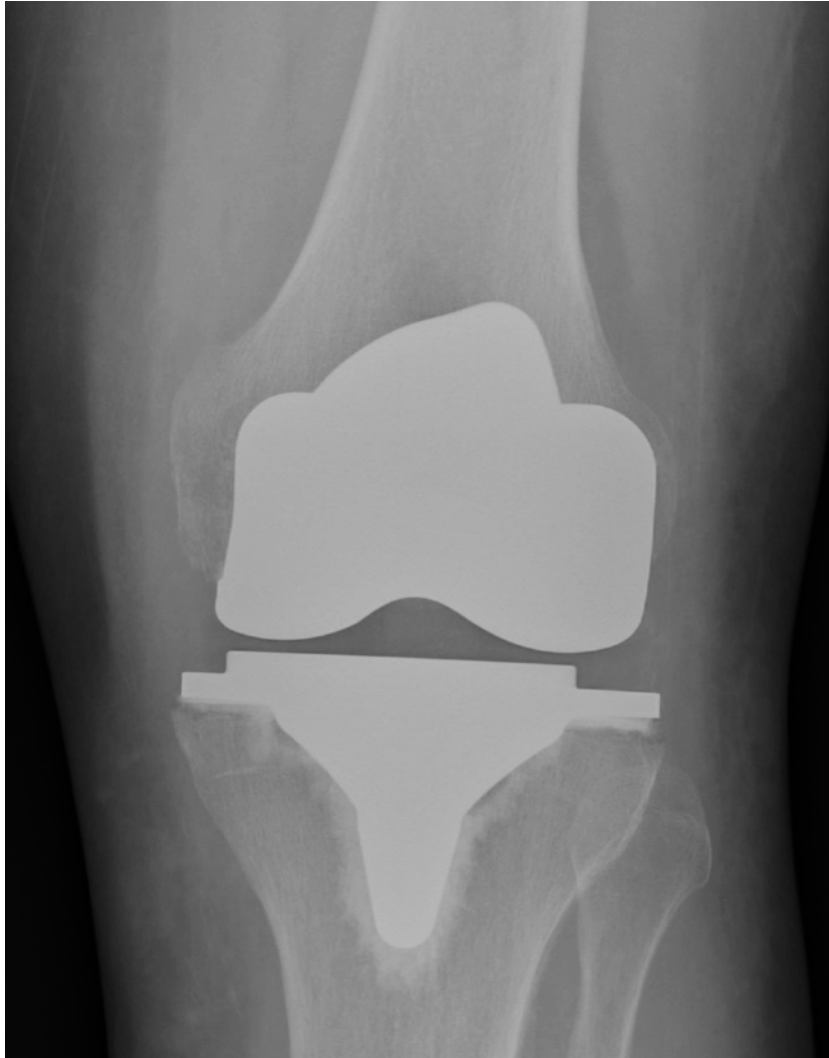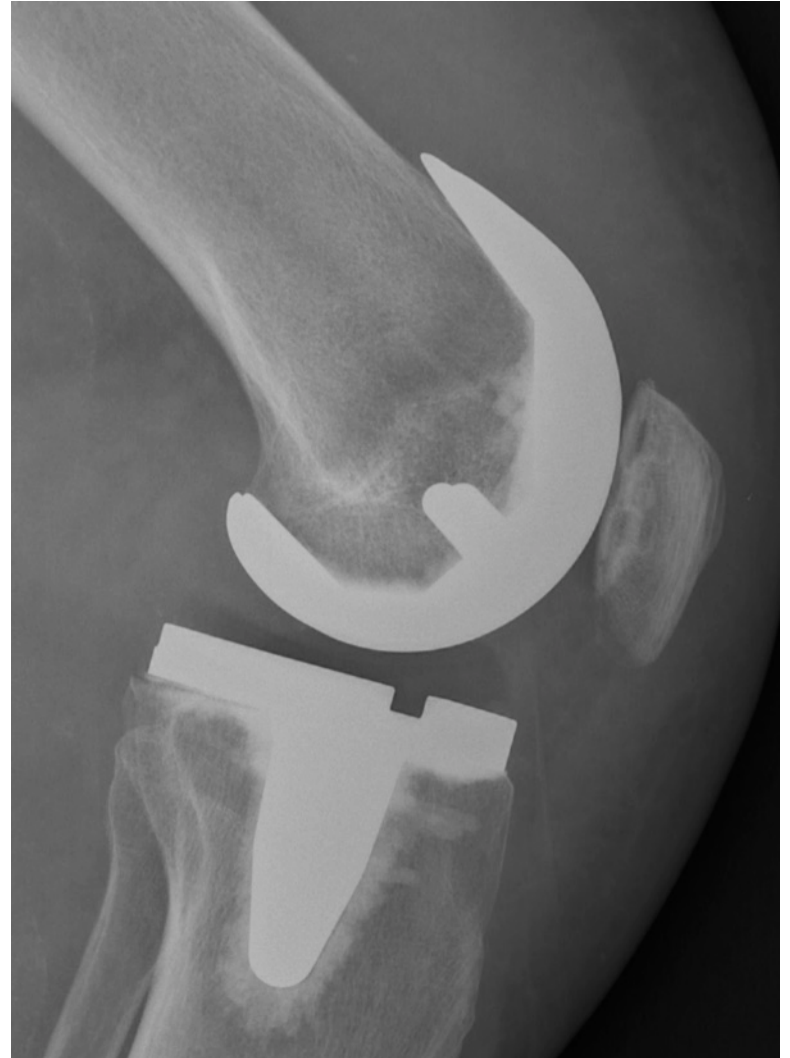

6 months postop

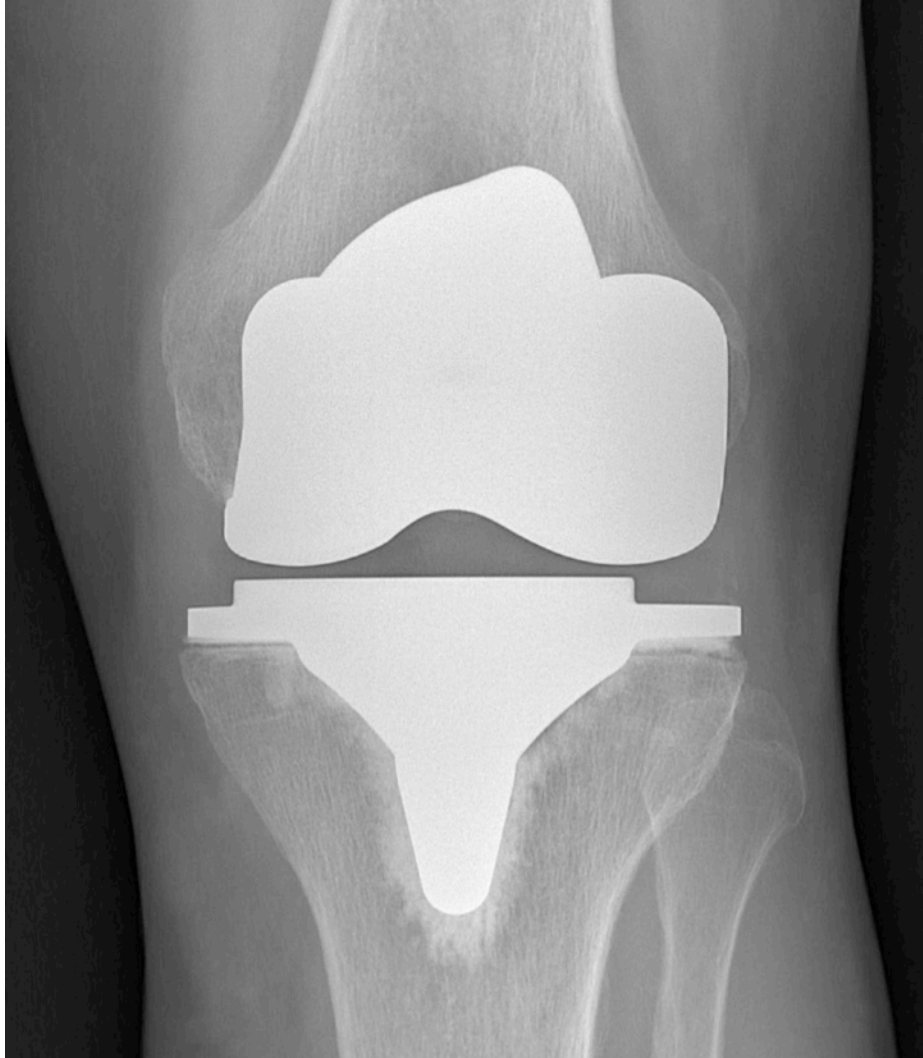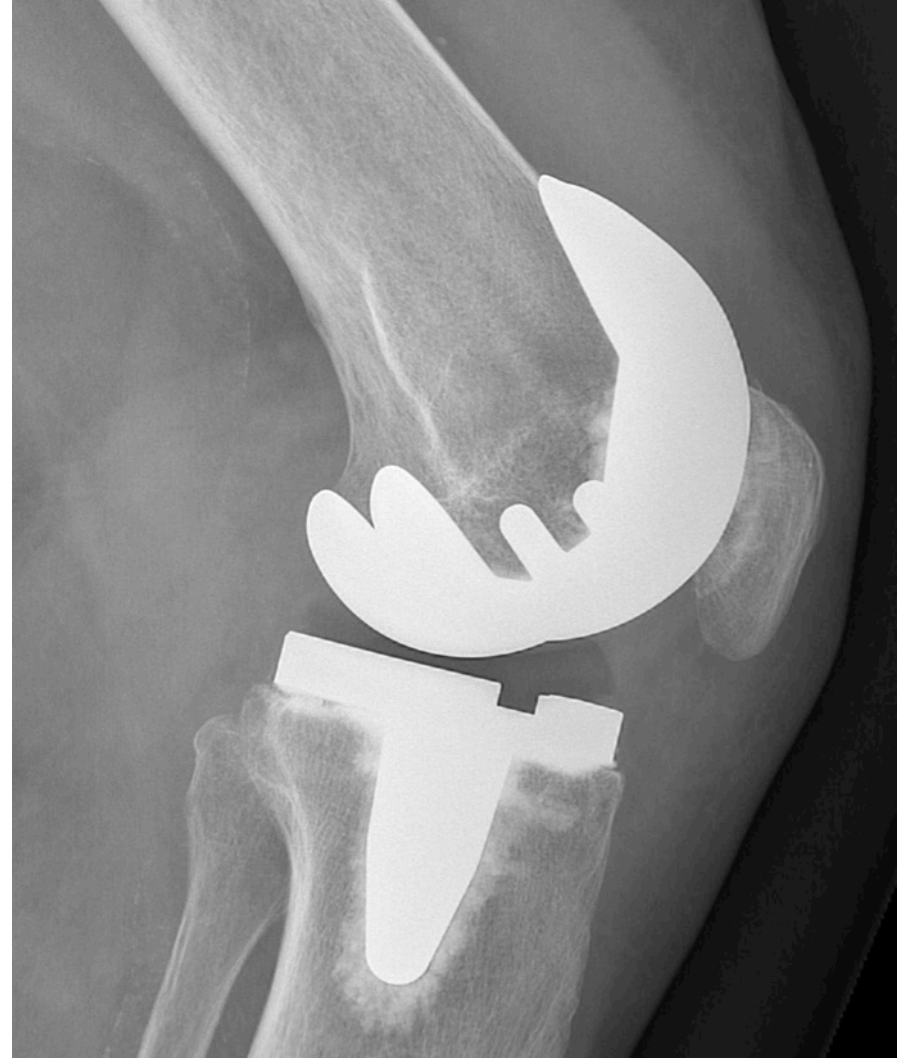

12 months postop

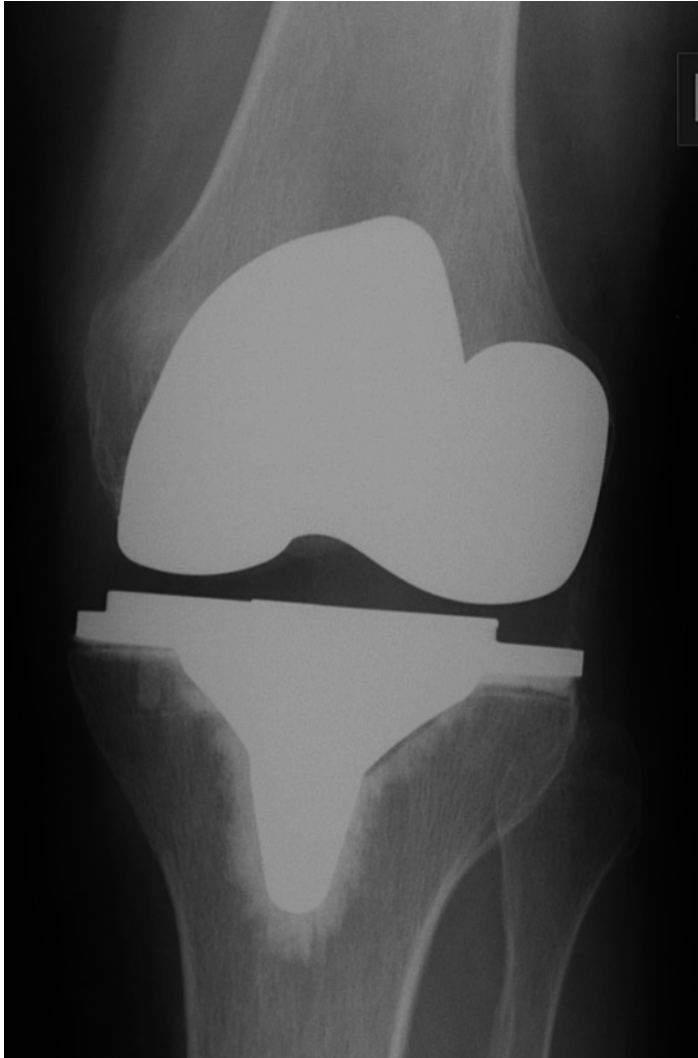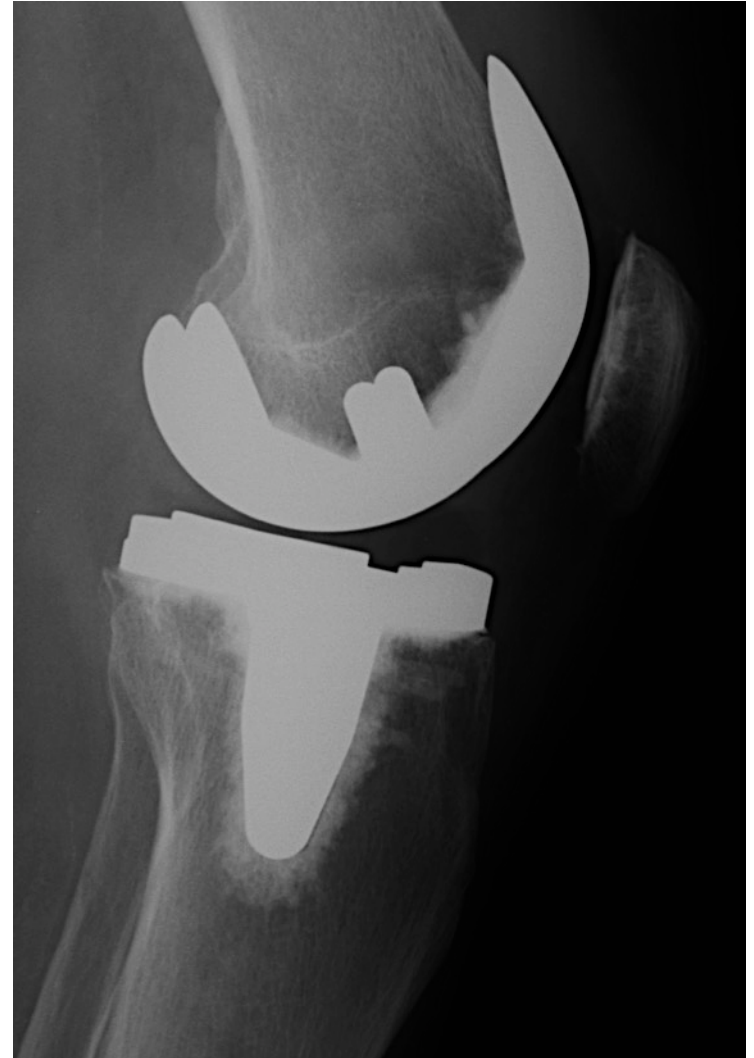

# Case 11

preoperative

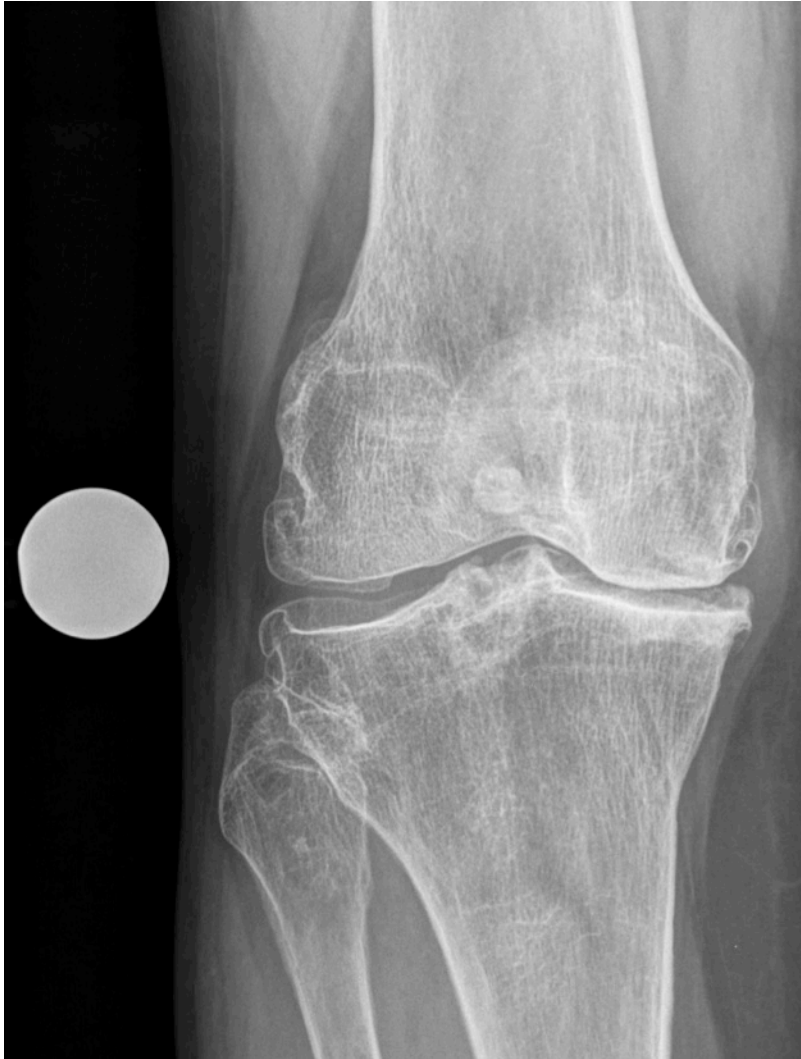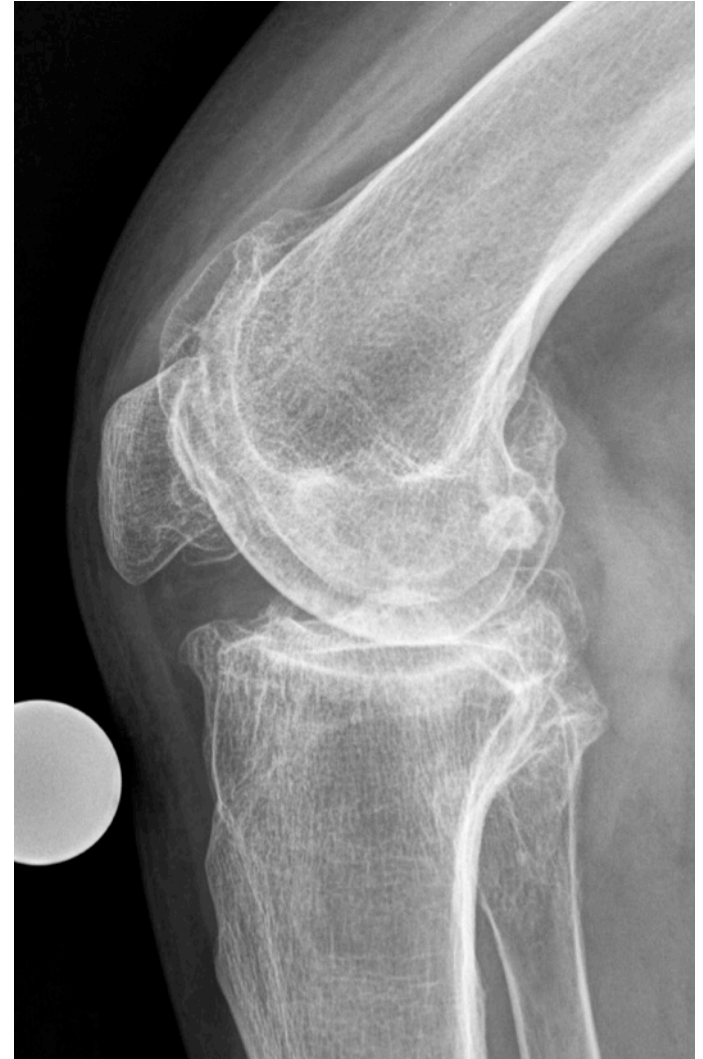



6 weeks postop

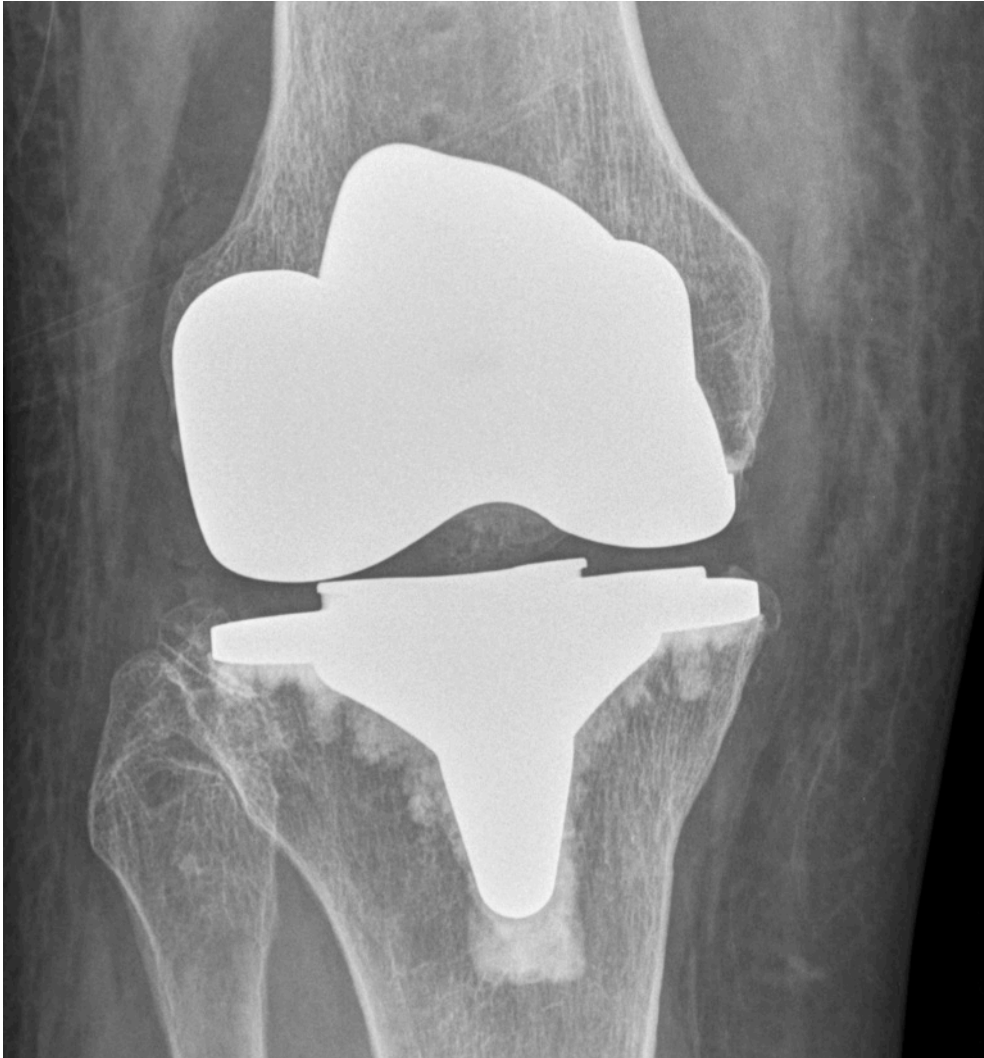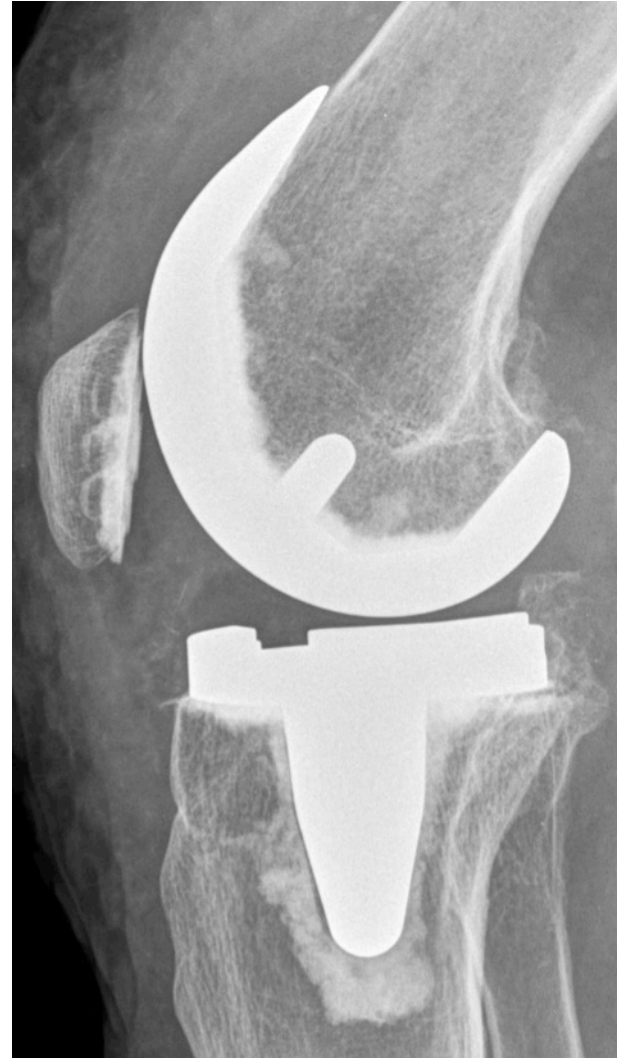

6 months postop

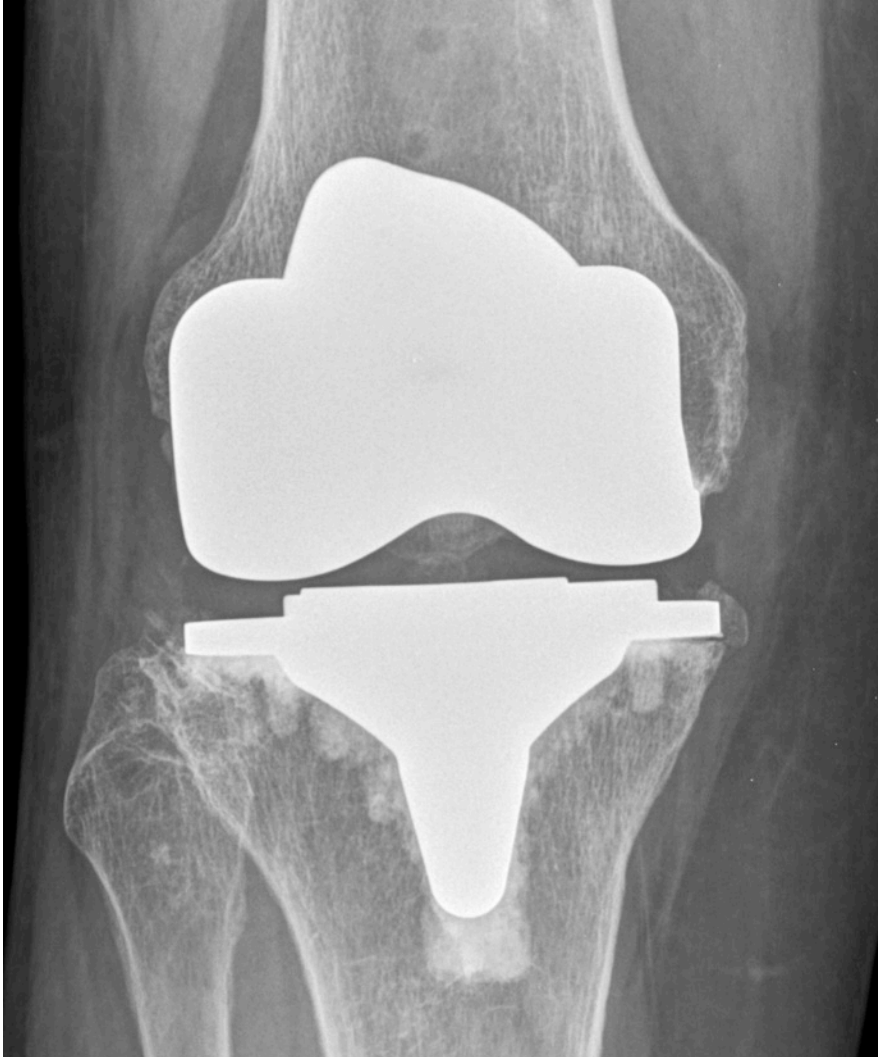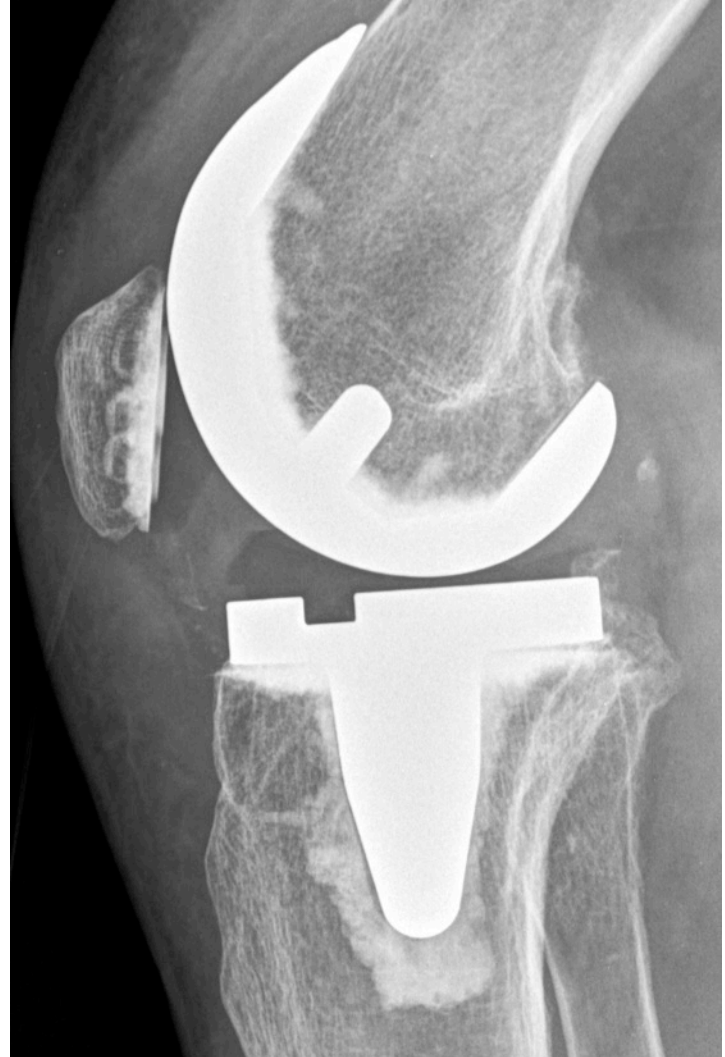

12 months postop

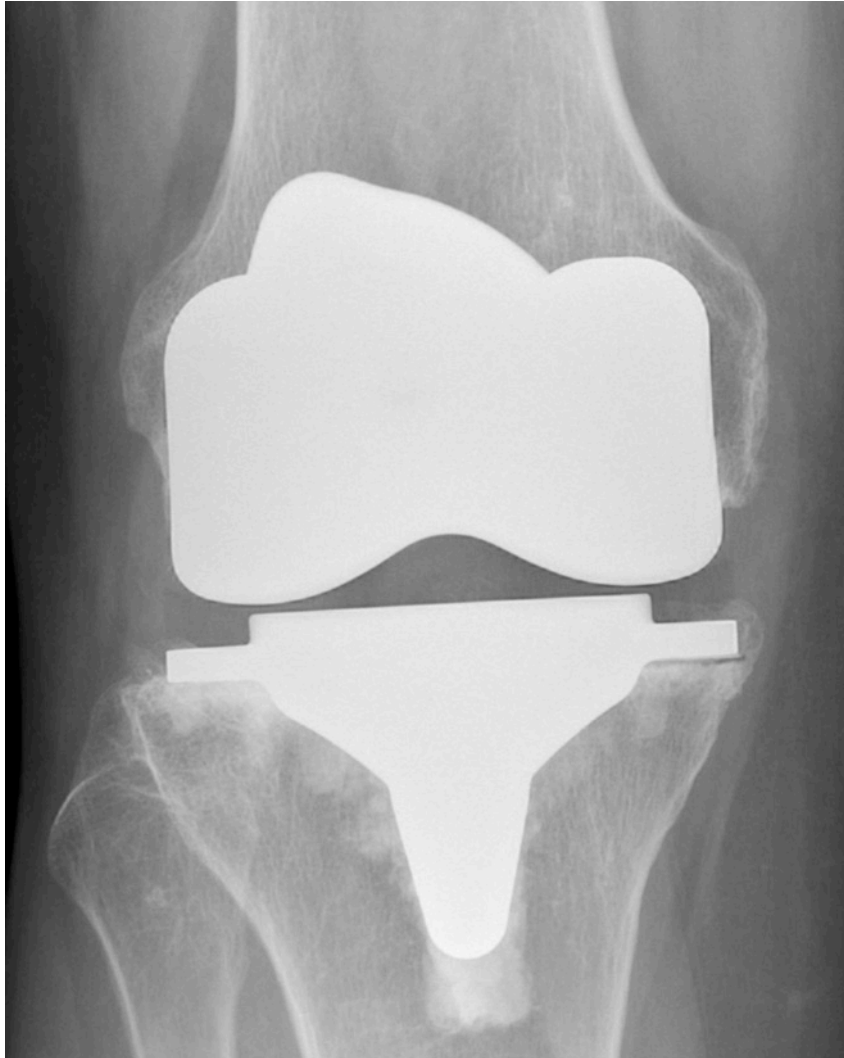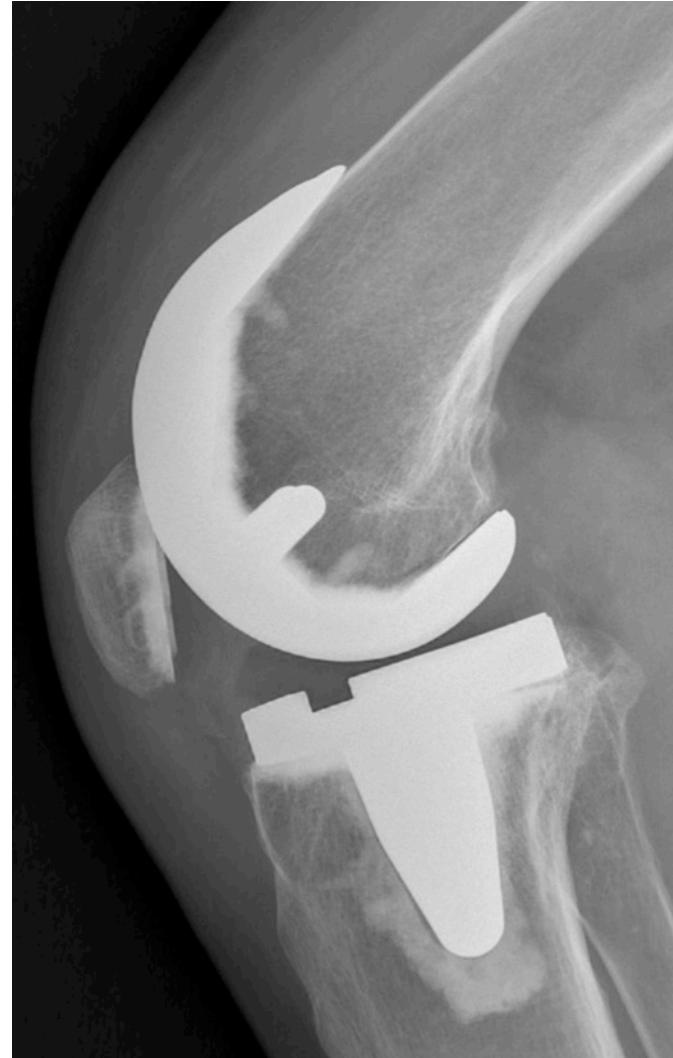

# Case 12

preoperative

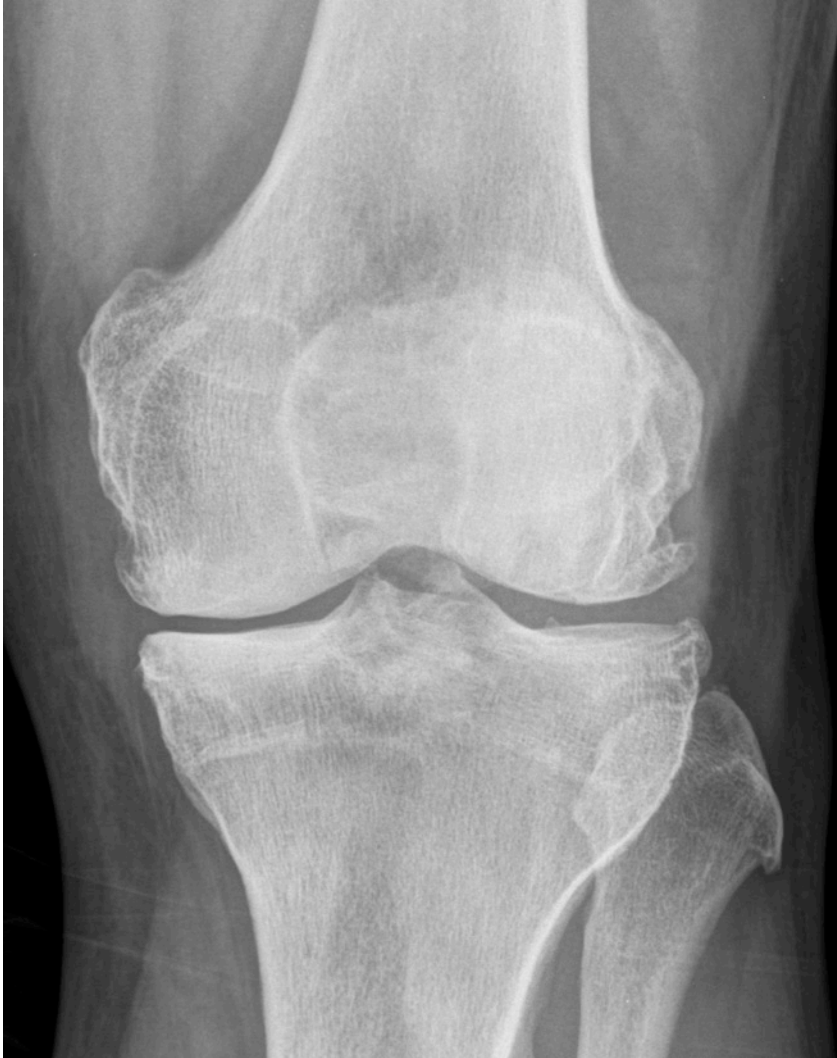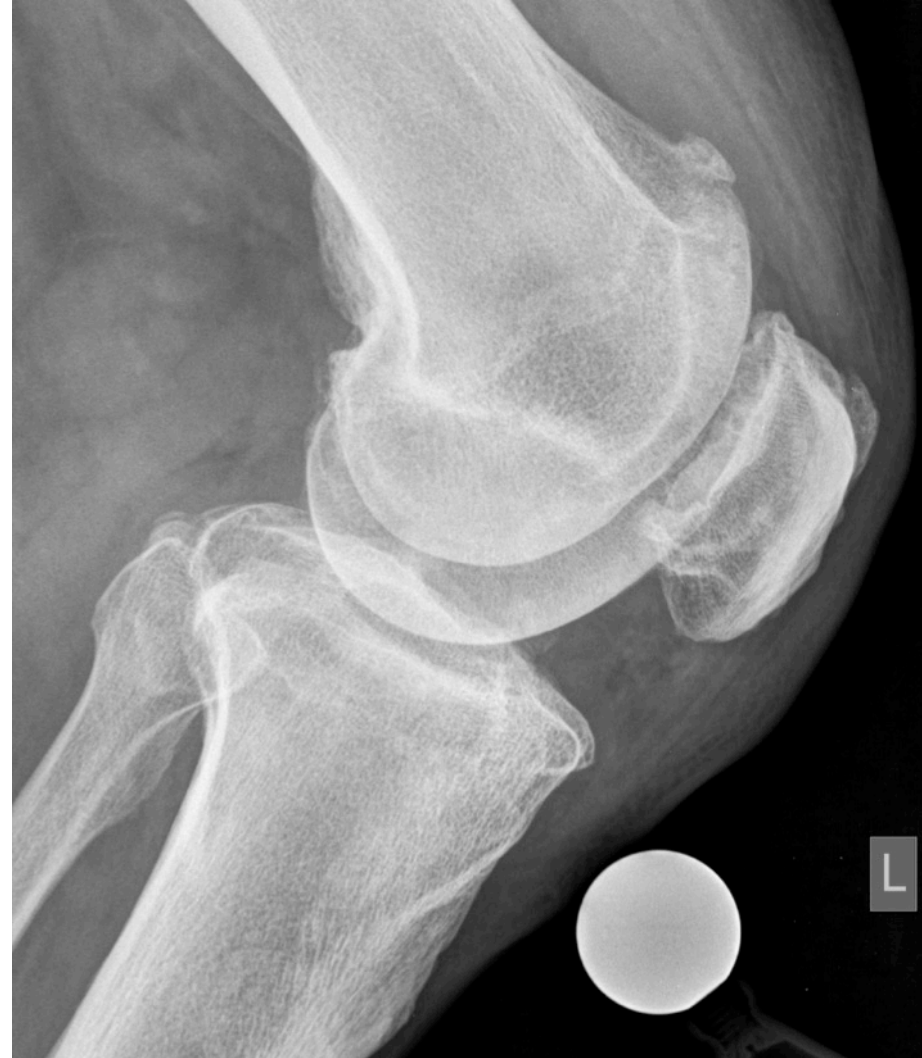

6 weeks postop

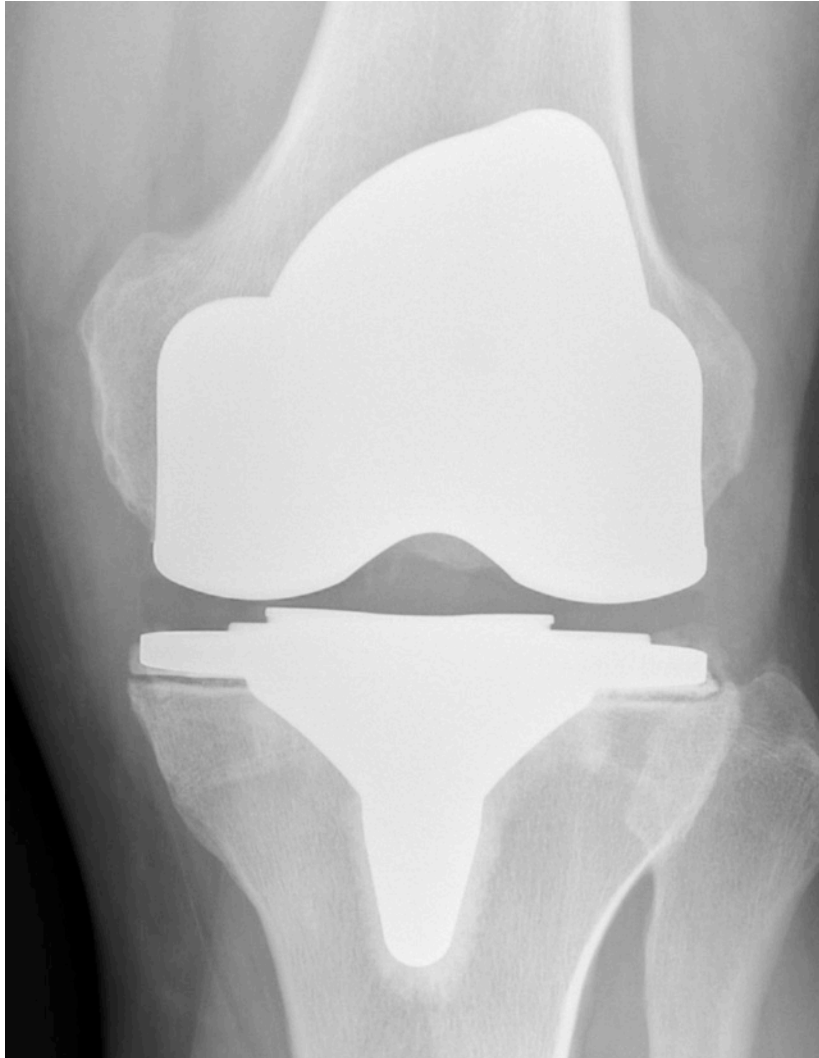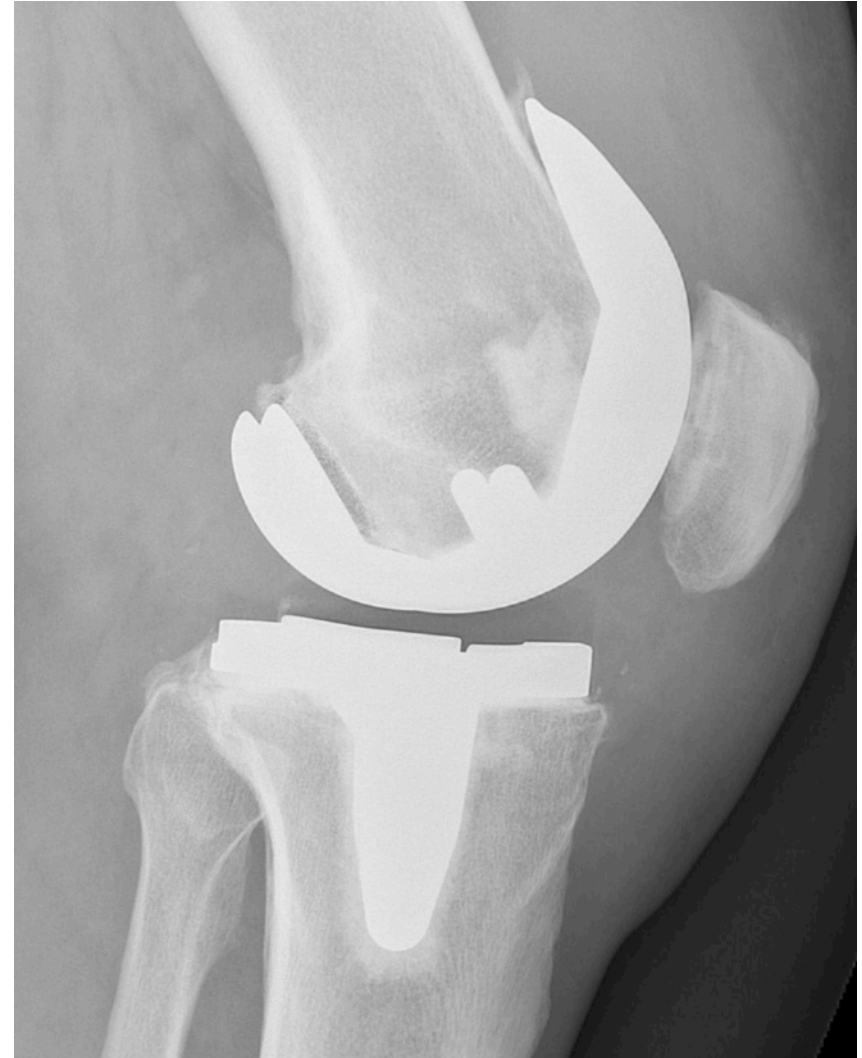

6 months postop

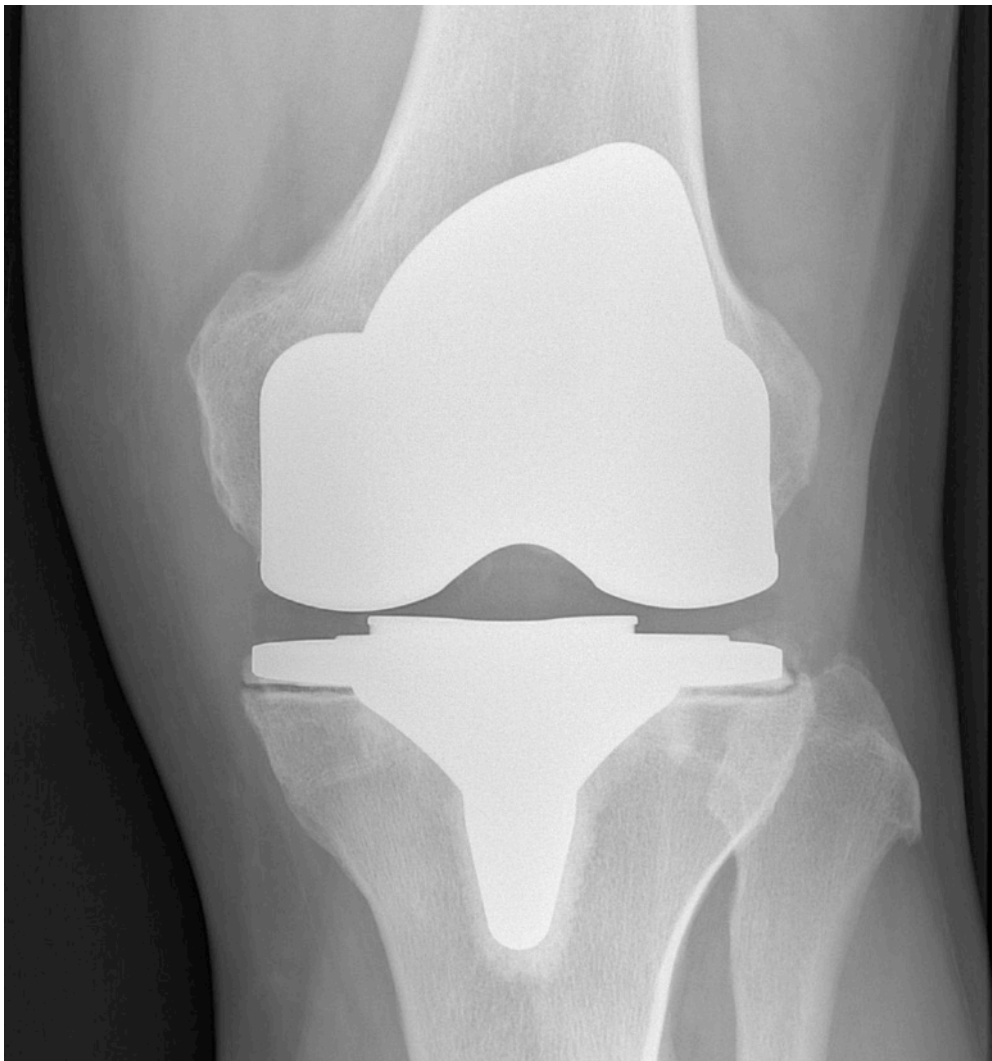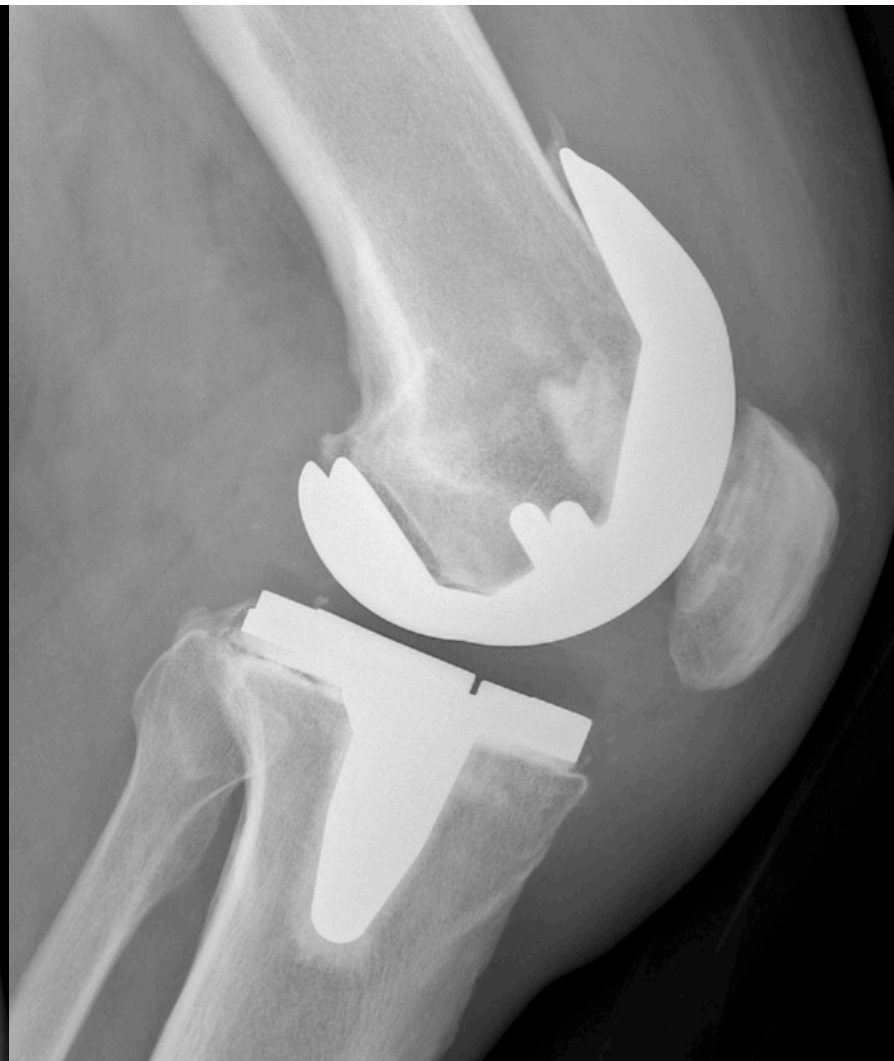



12 months postop

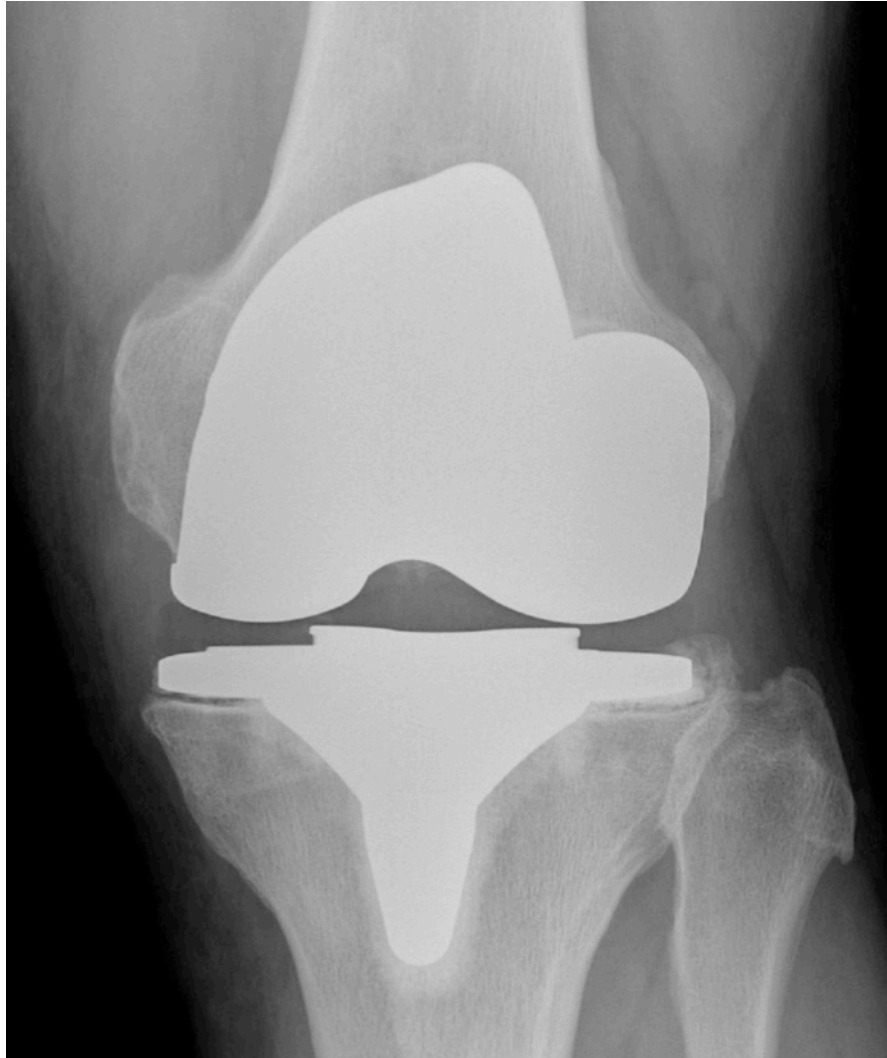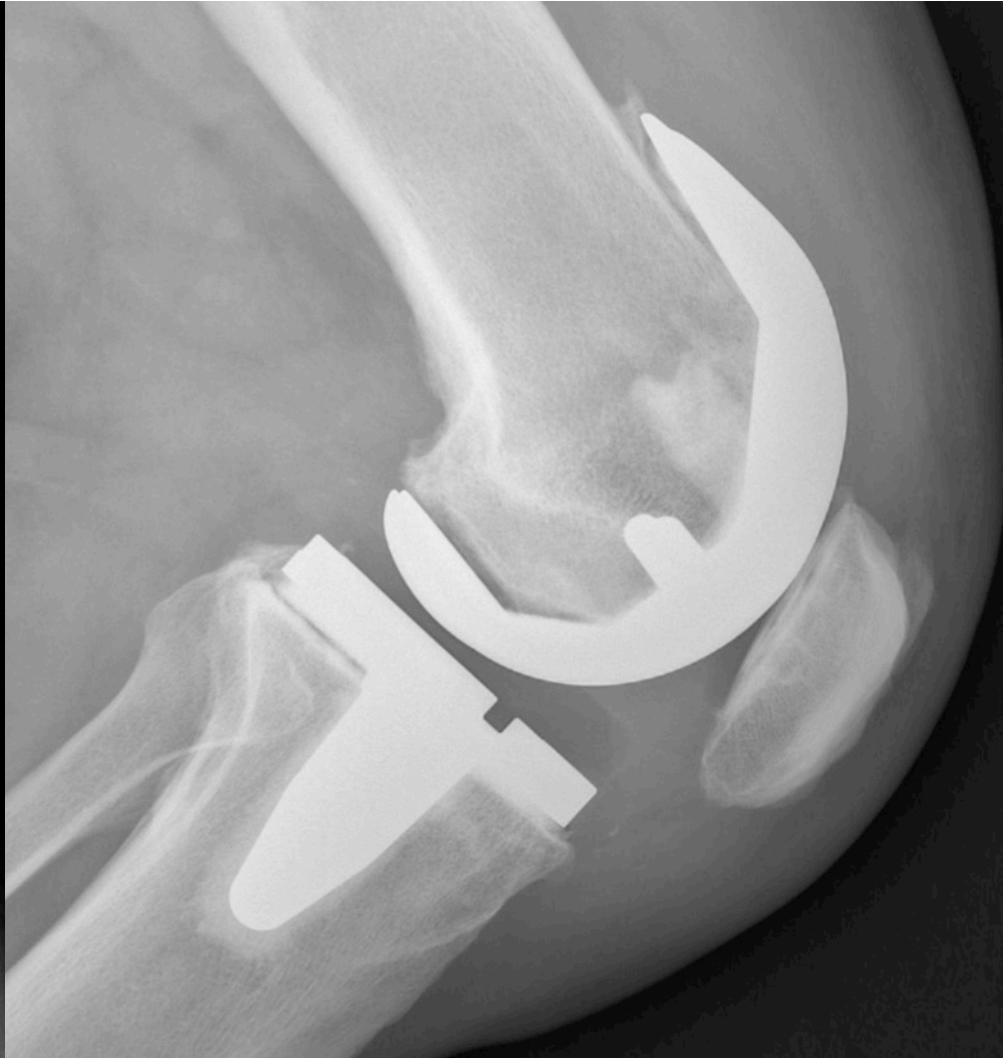



# Case 13

preoperative

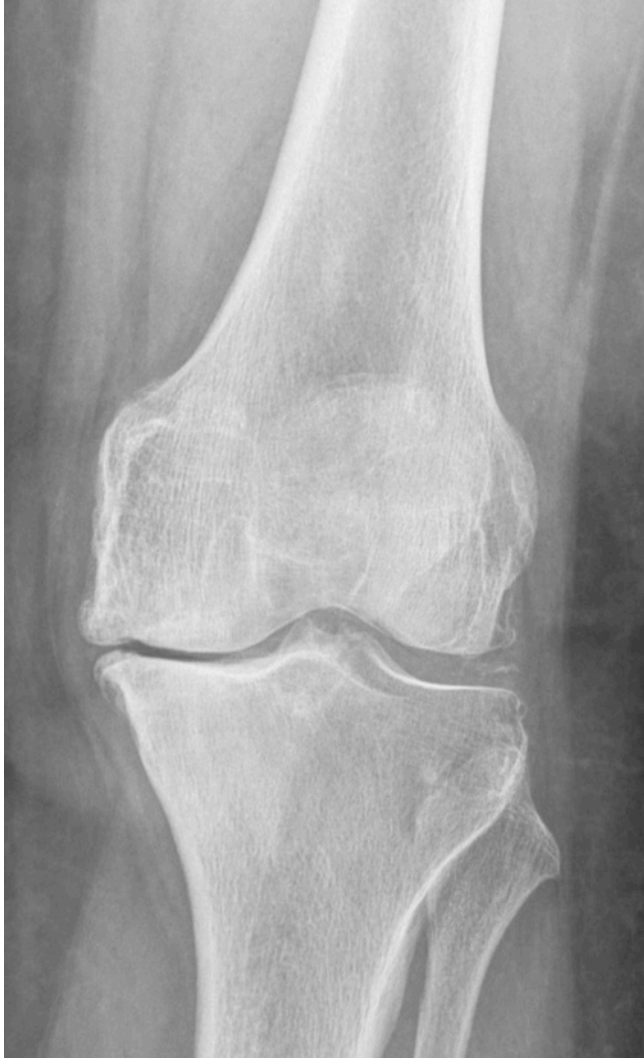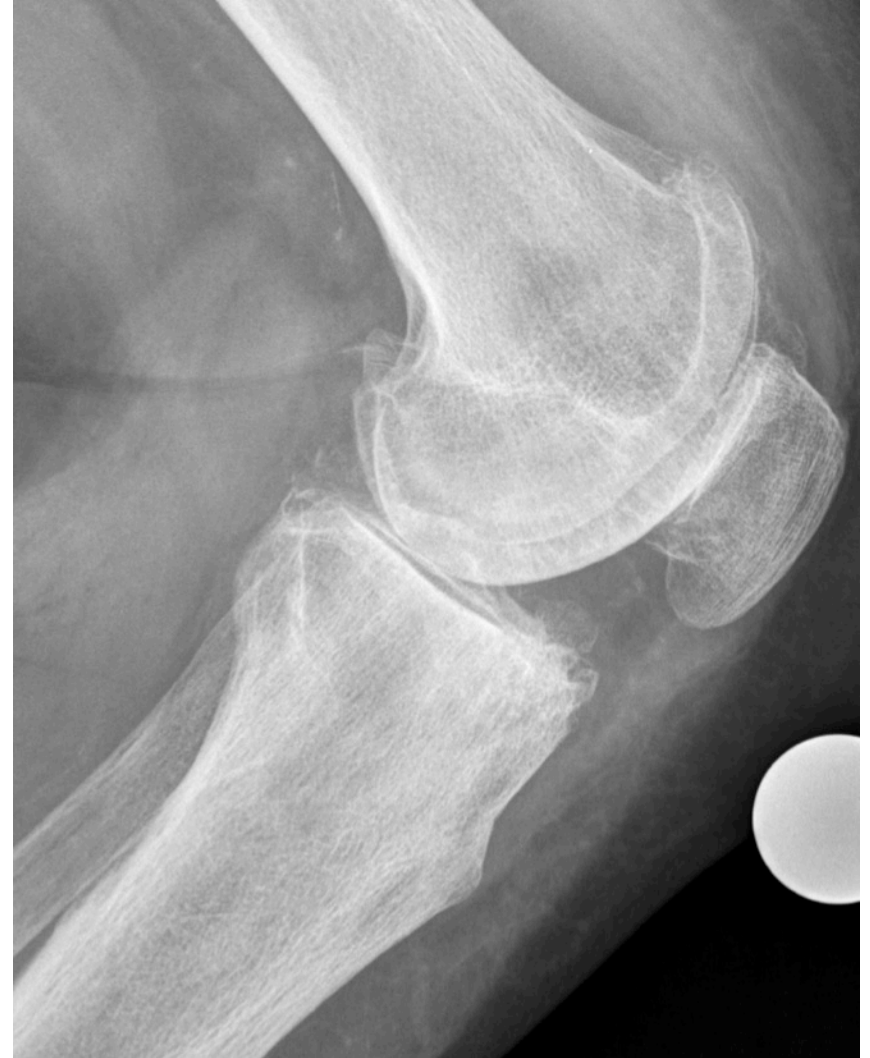

6 weeks postop

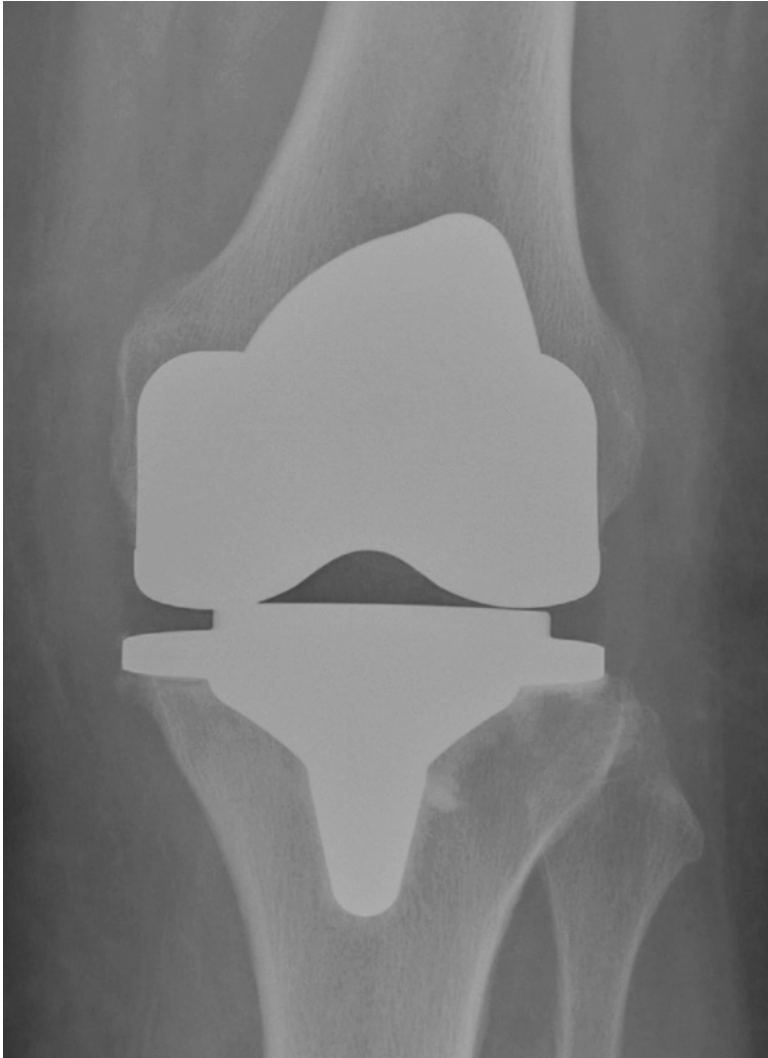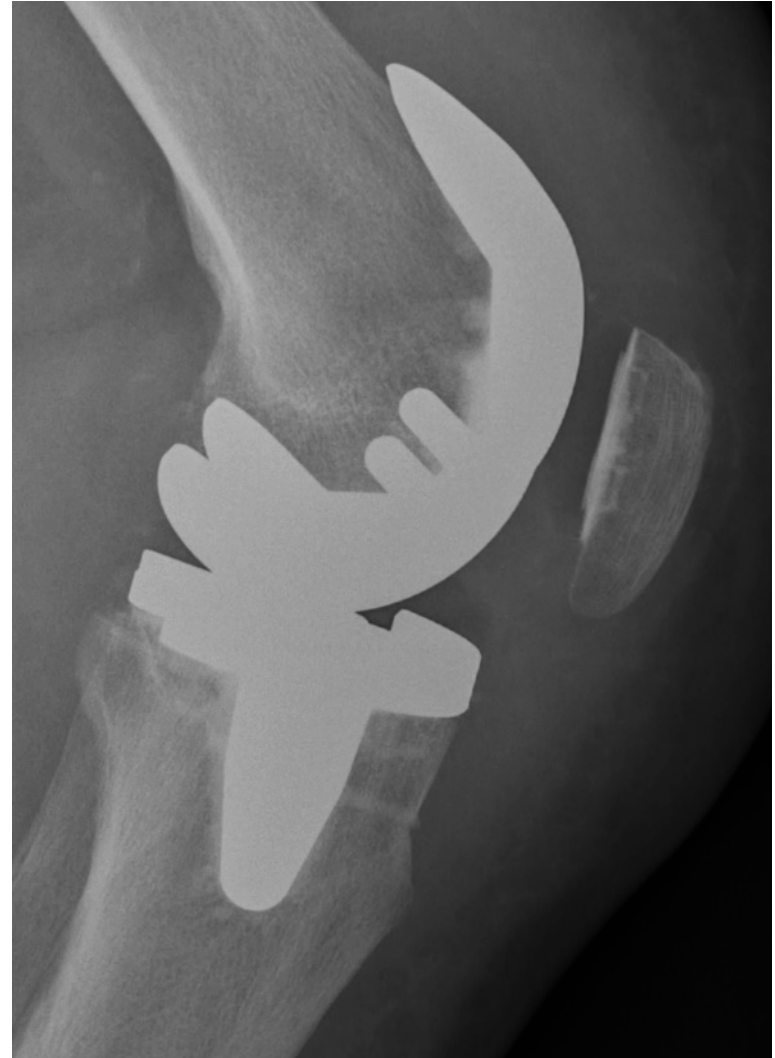

6 months postop

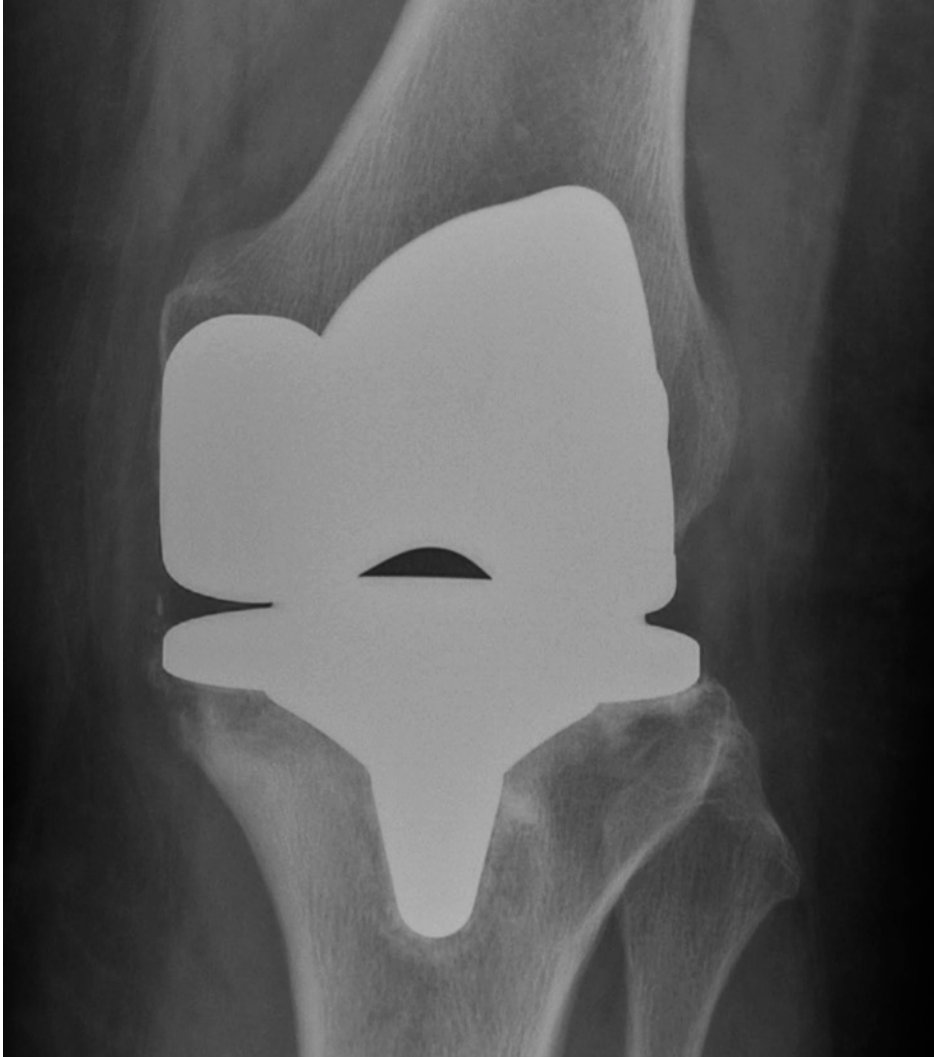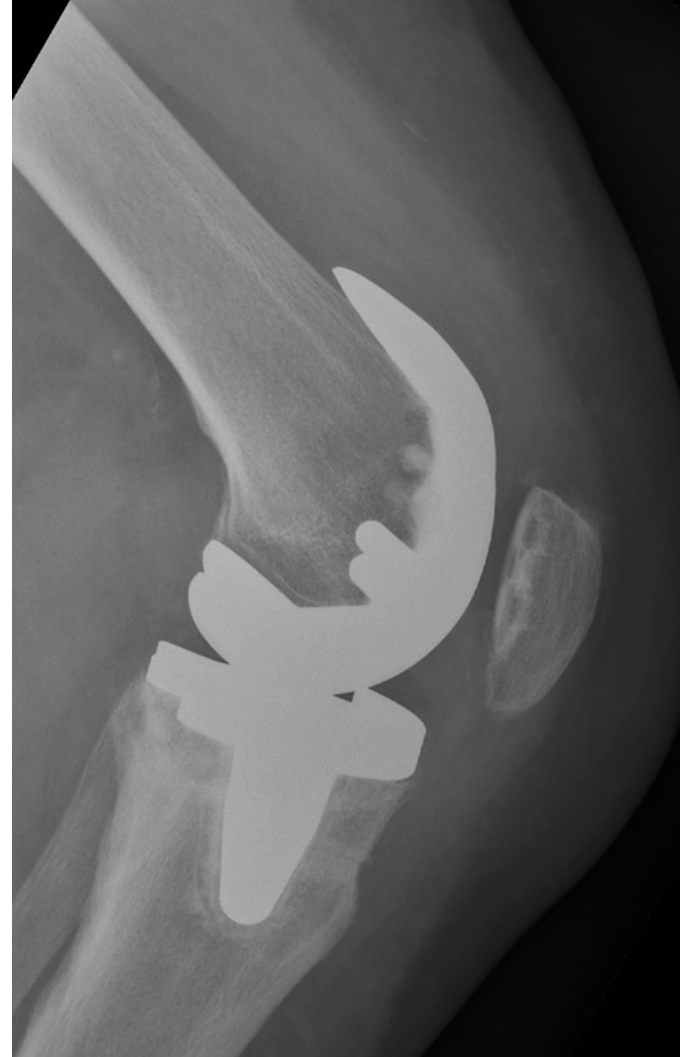

12 months postop

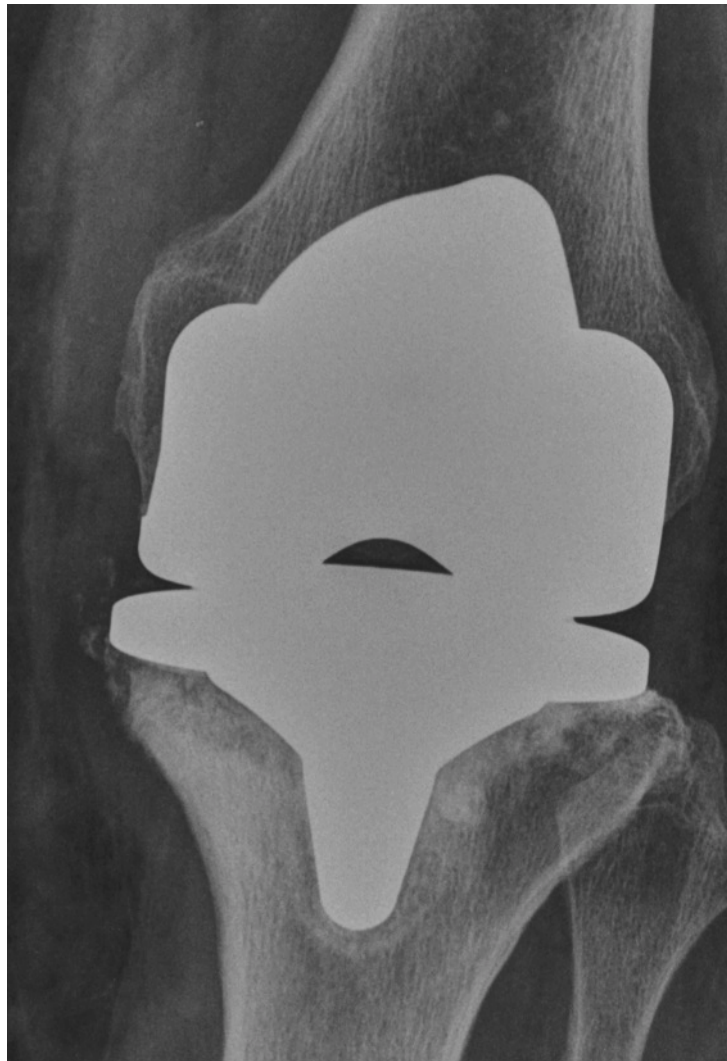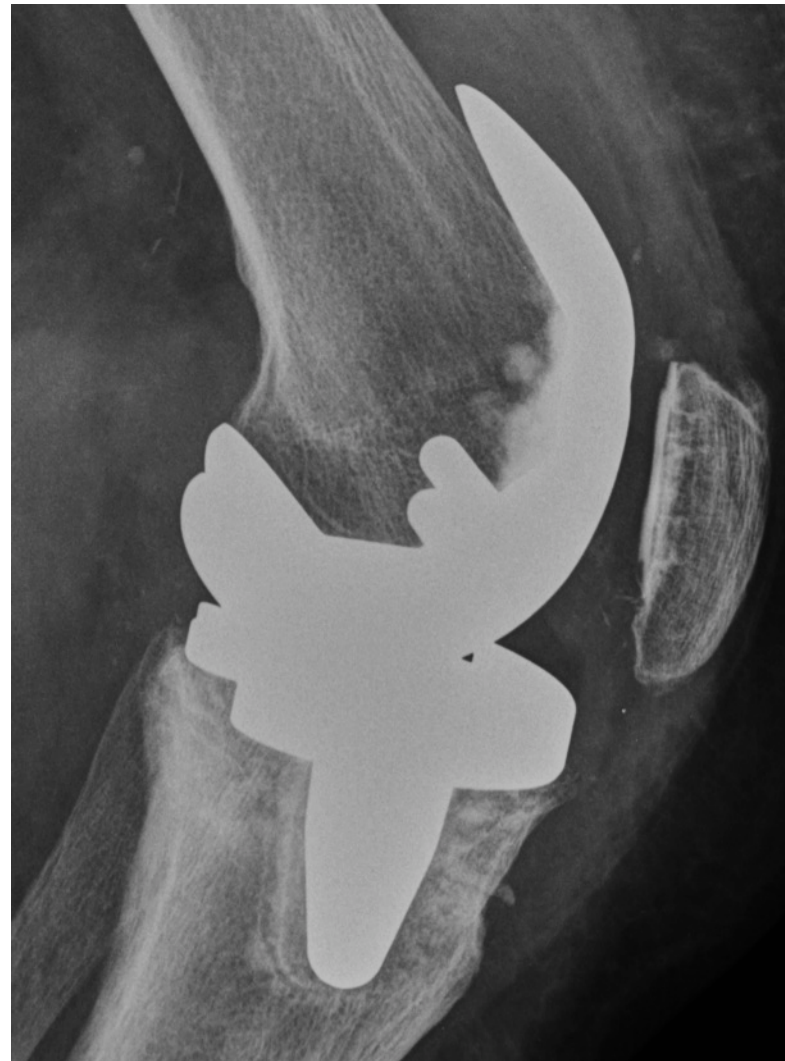

# Case 14



preoperative

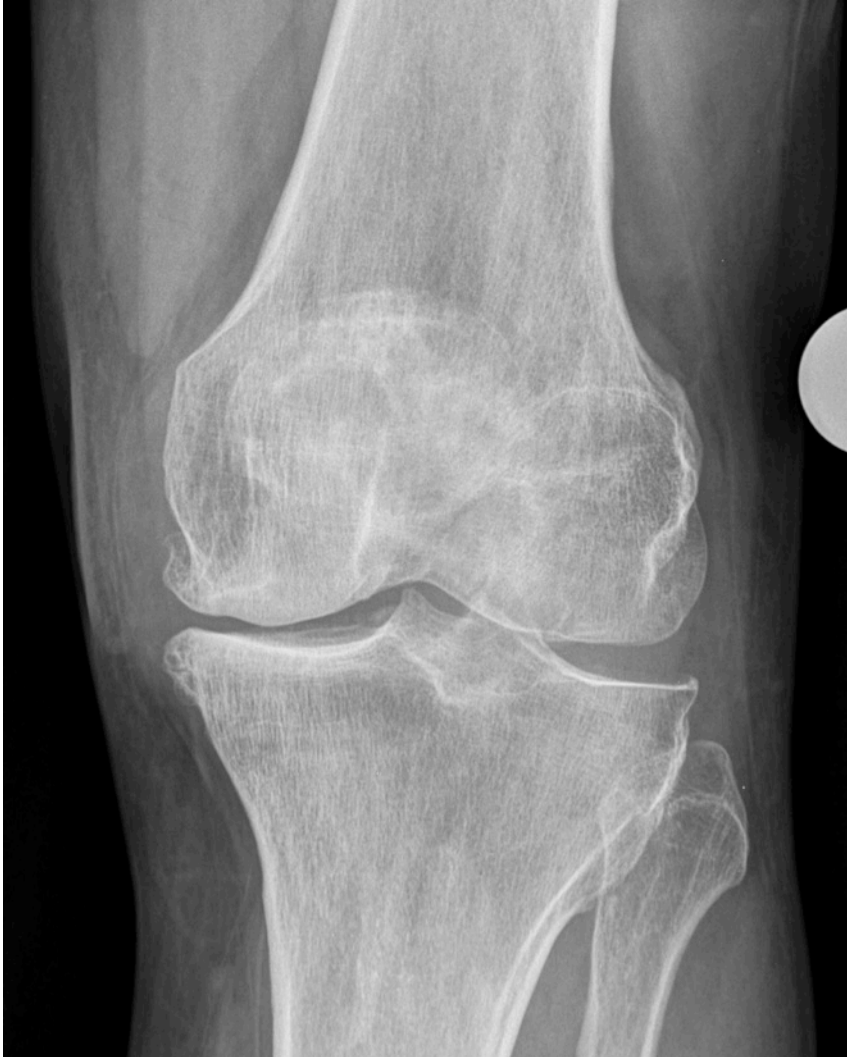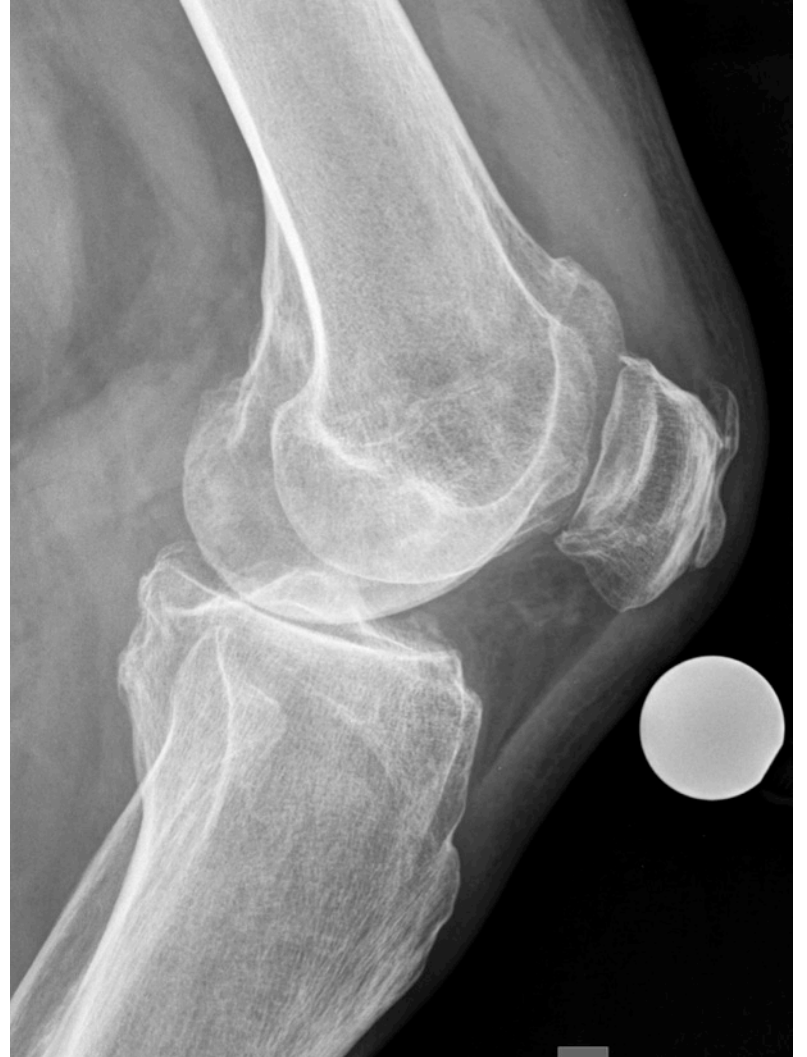

6 weeks postop

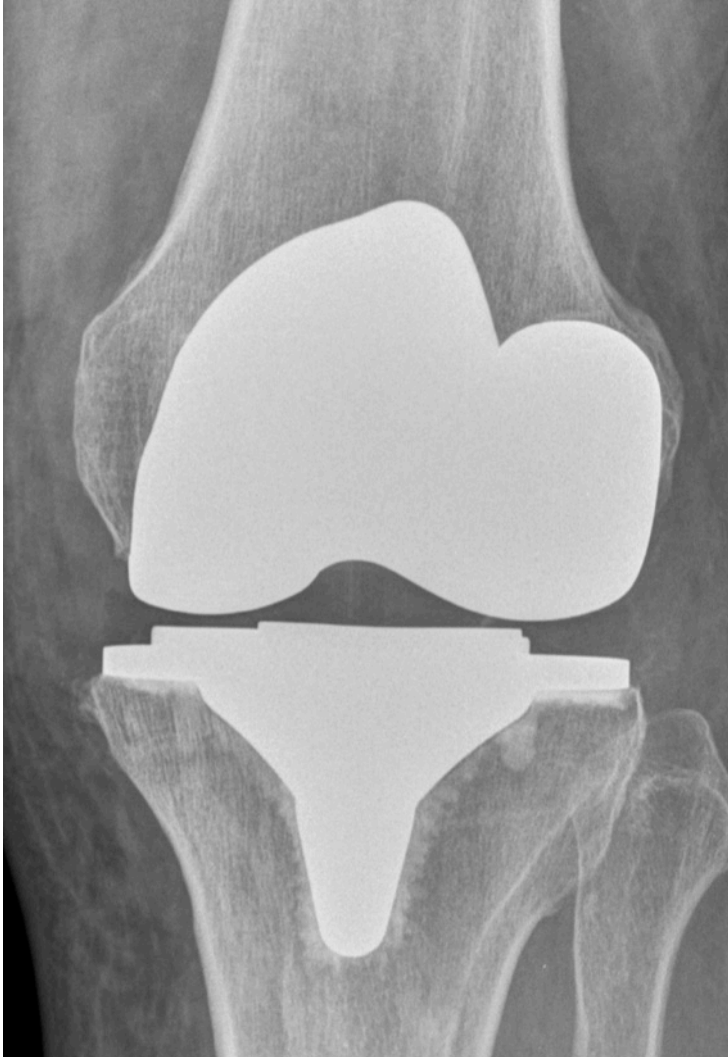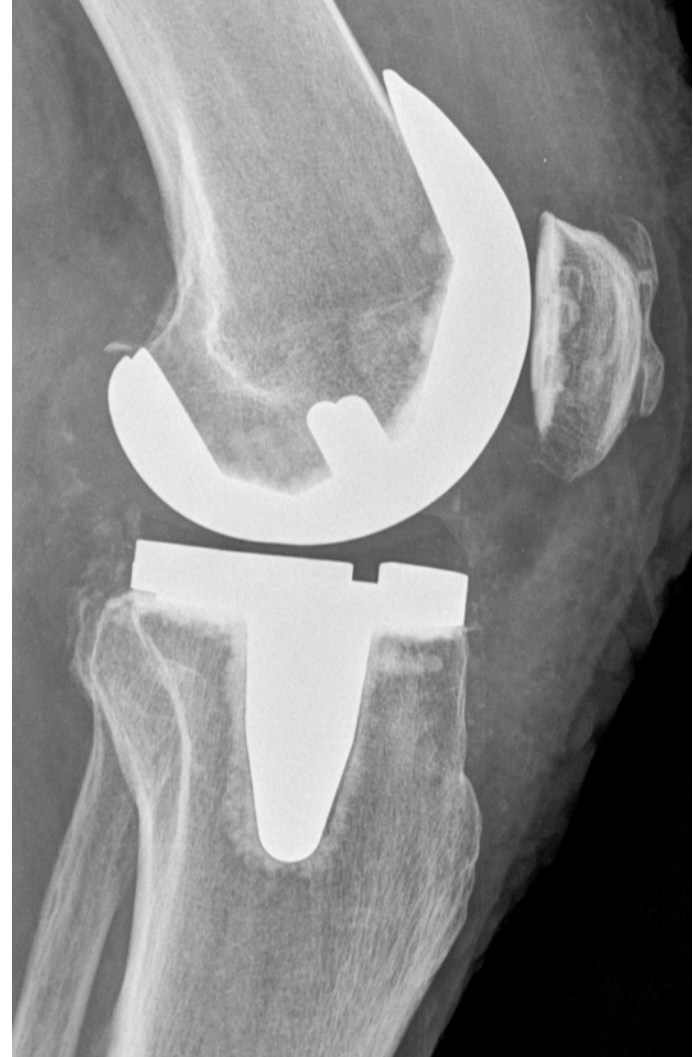



6 months postop

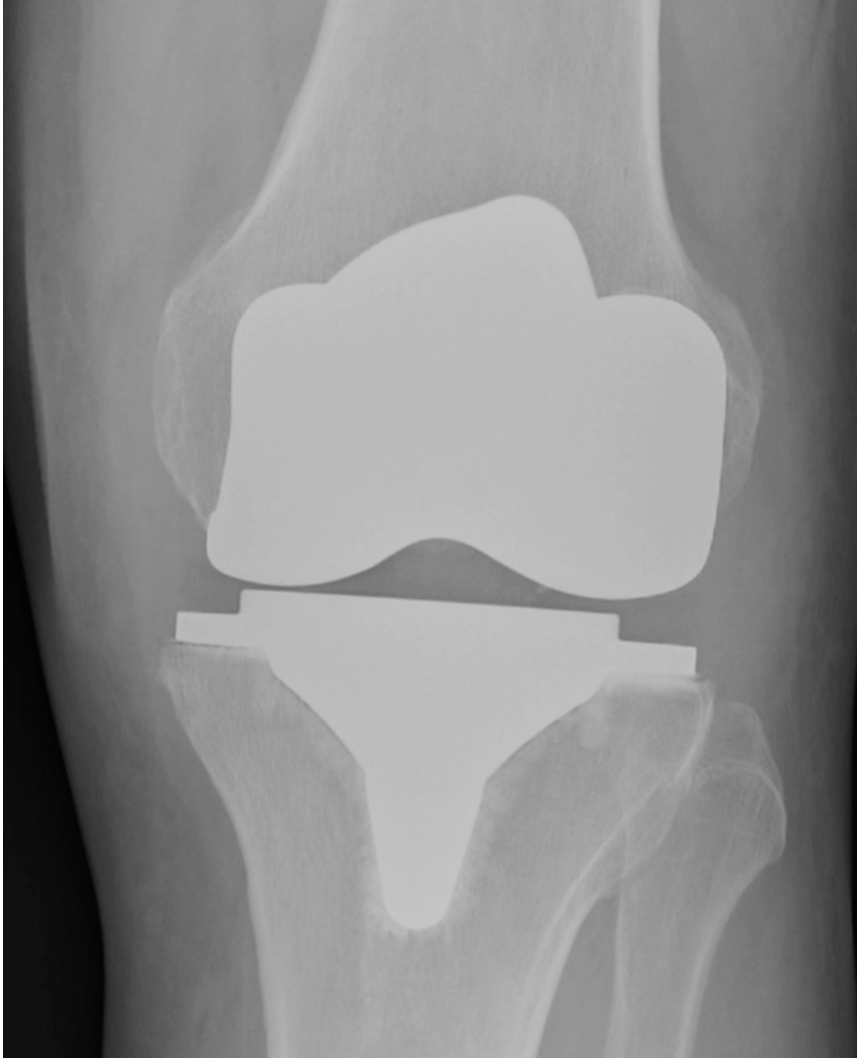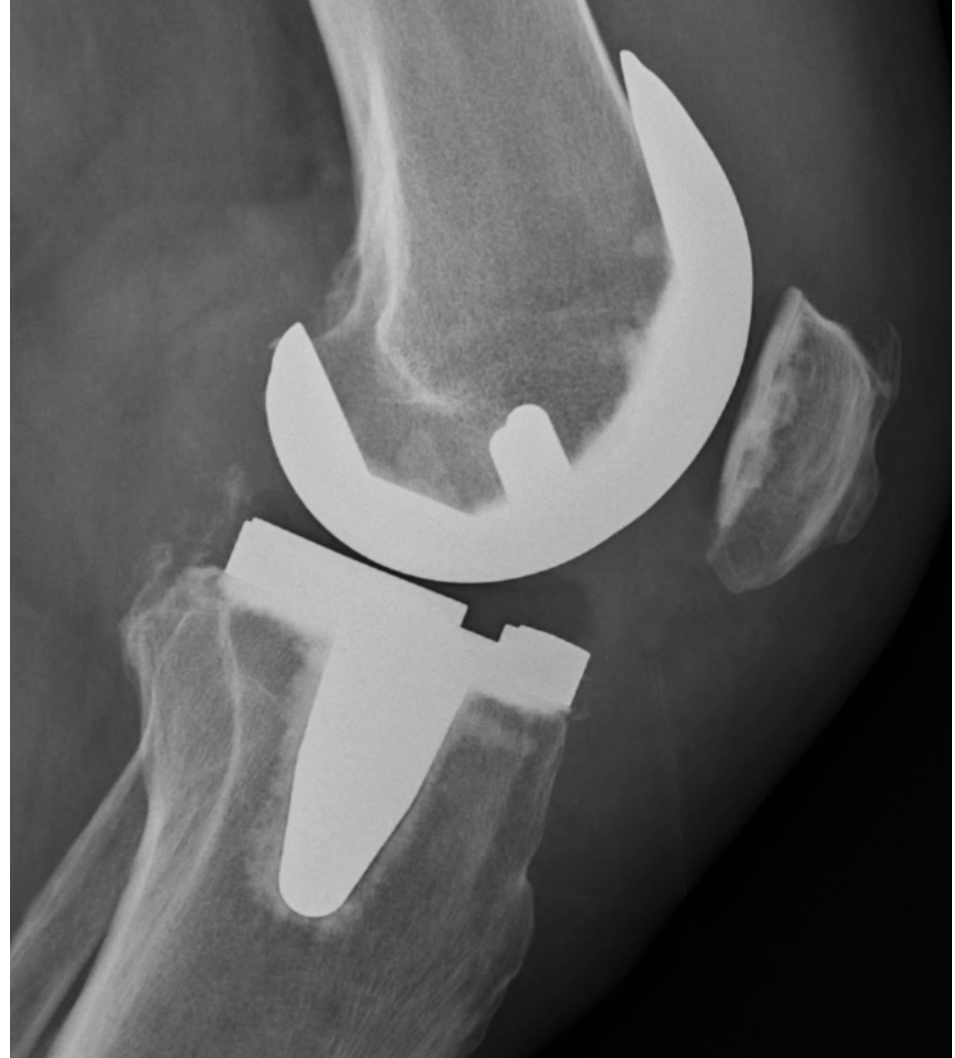

12 months postop

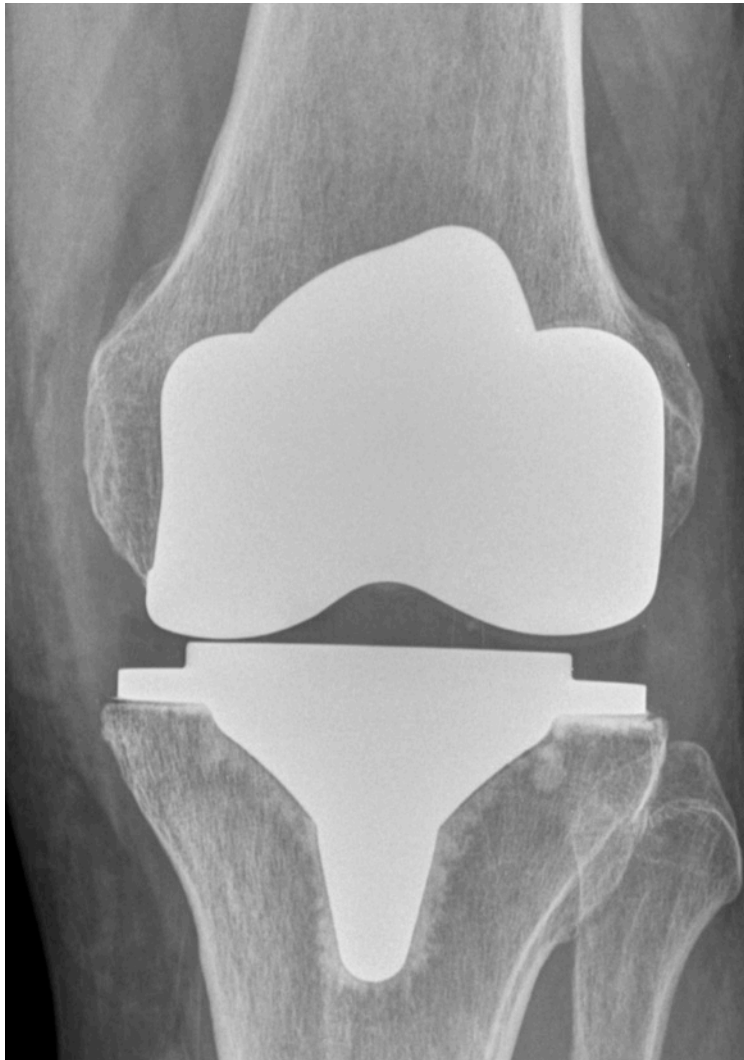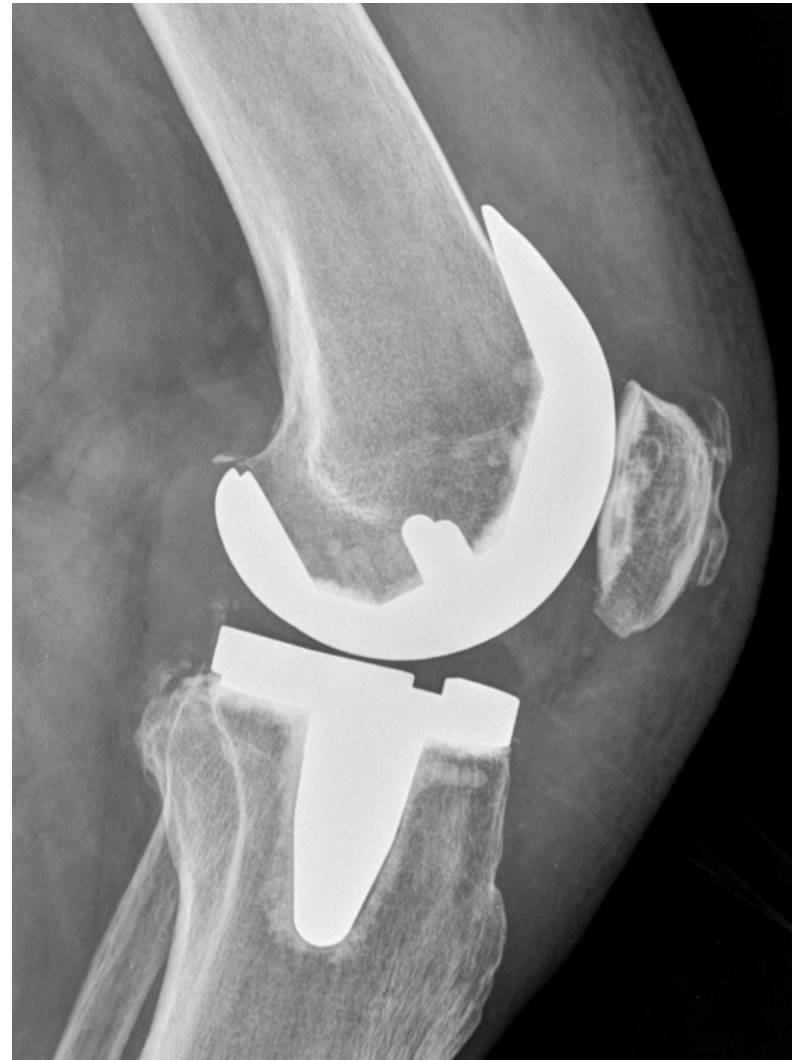

# Case 15

preoperative

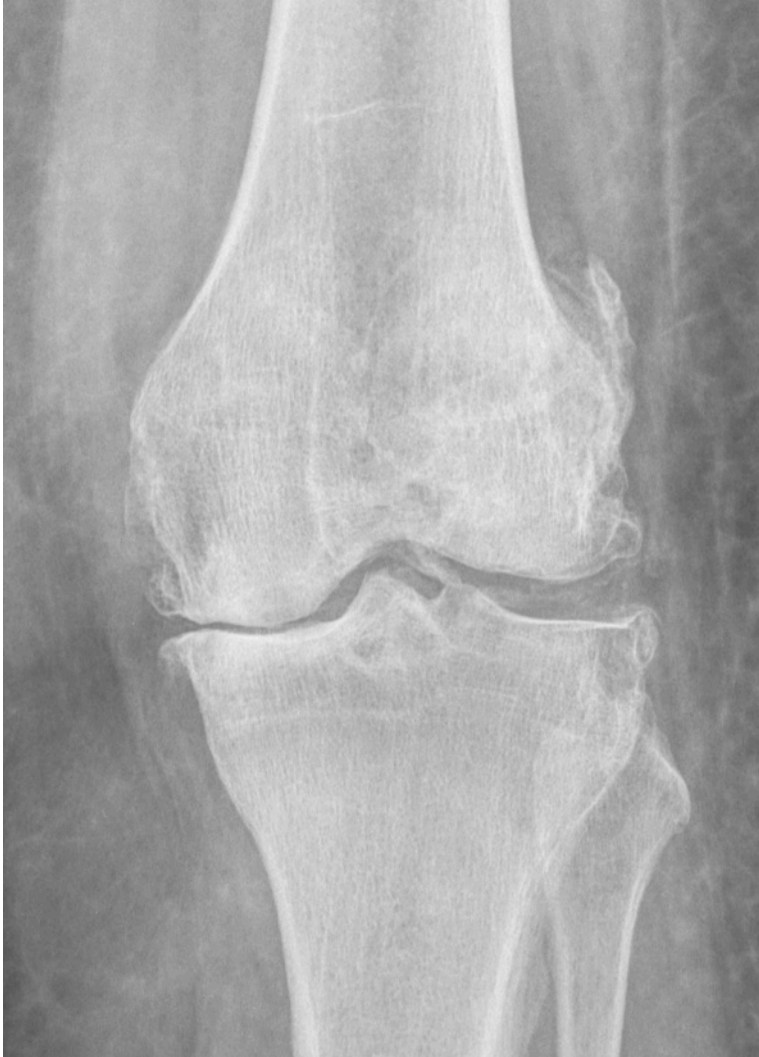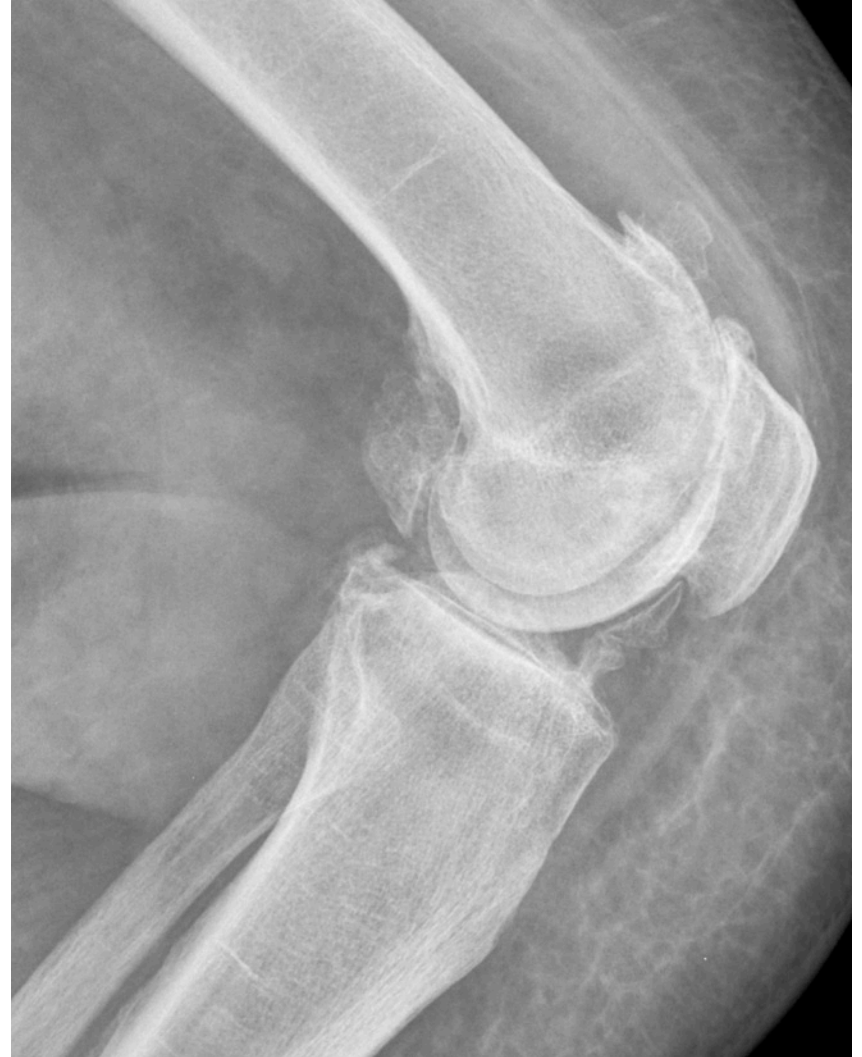

6 weeks postop

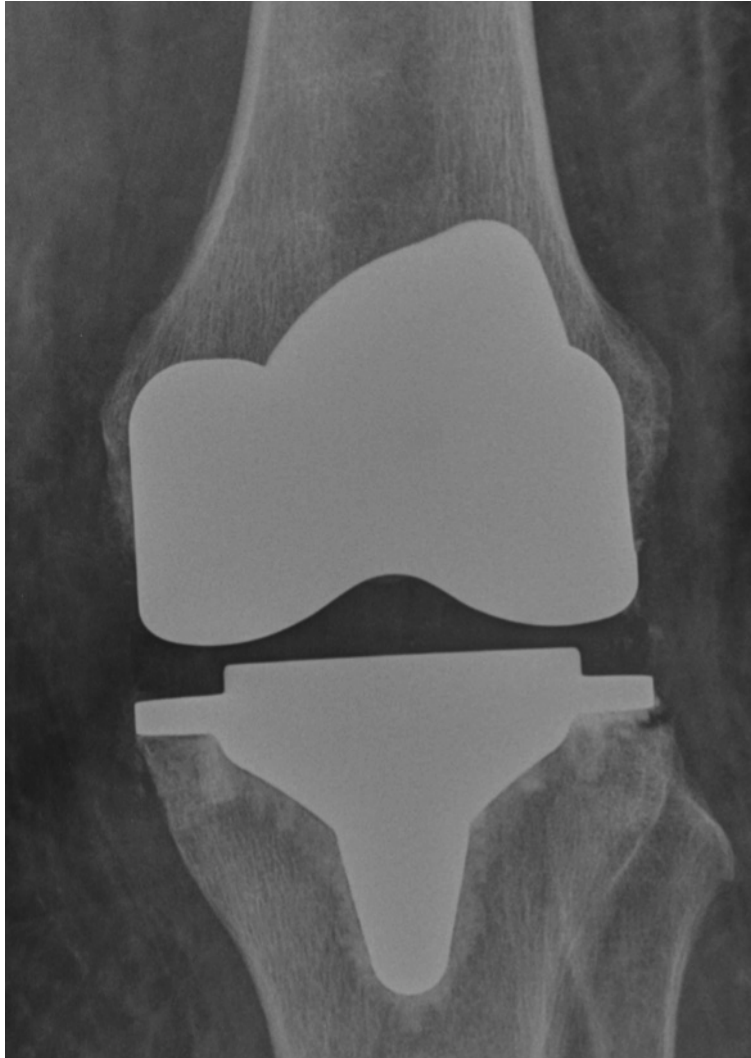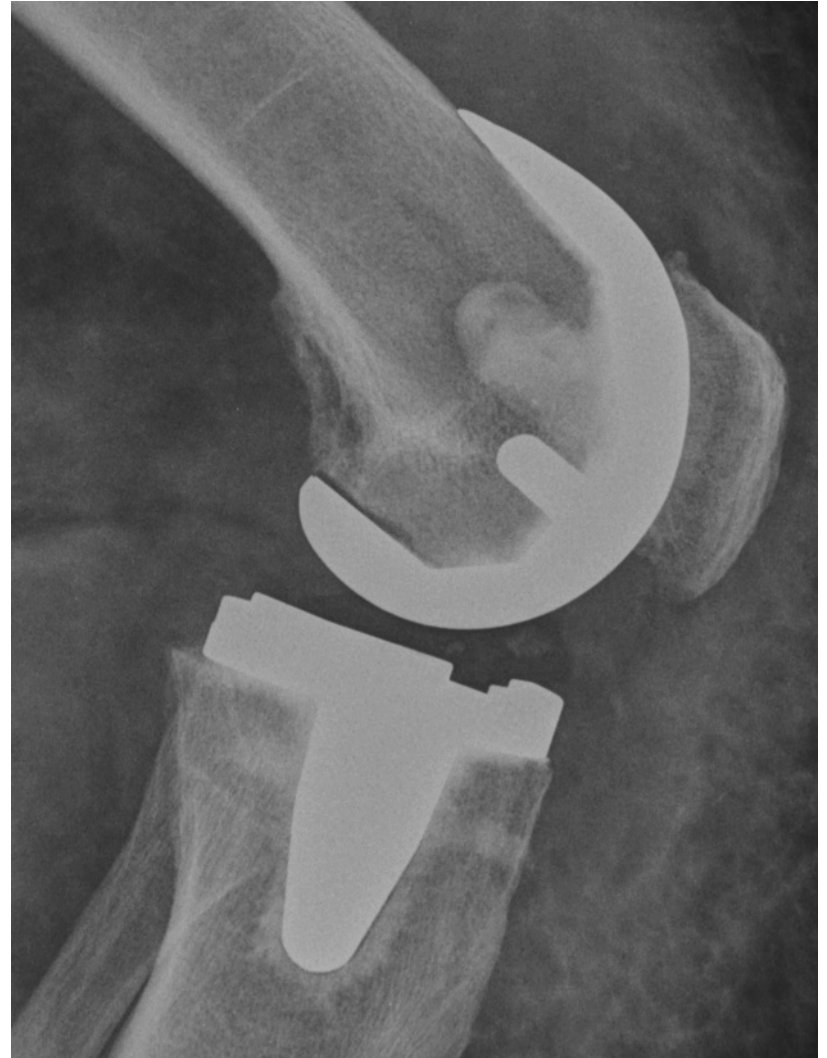



6 months postop

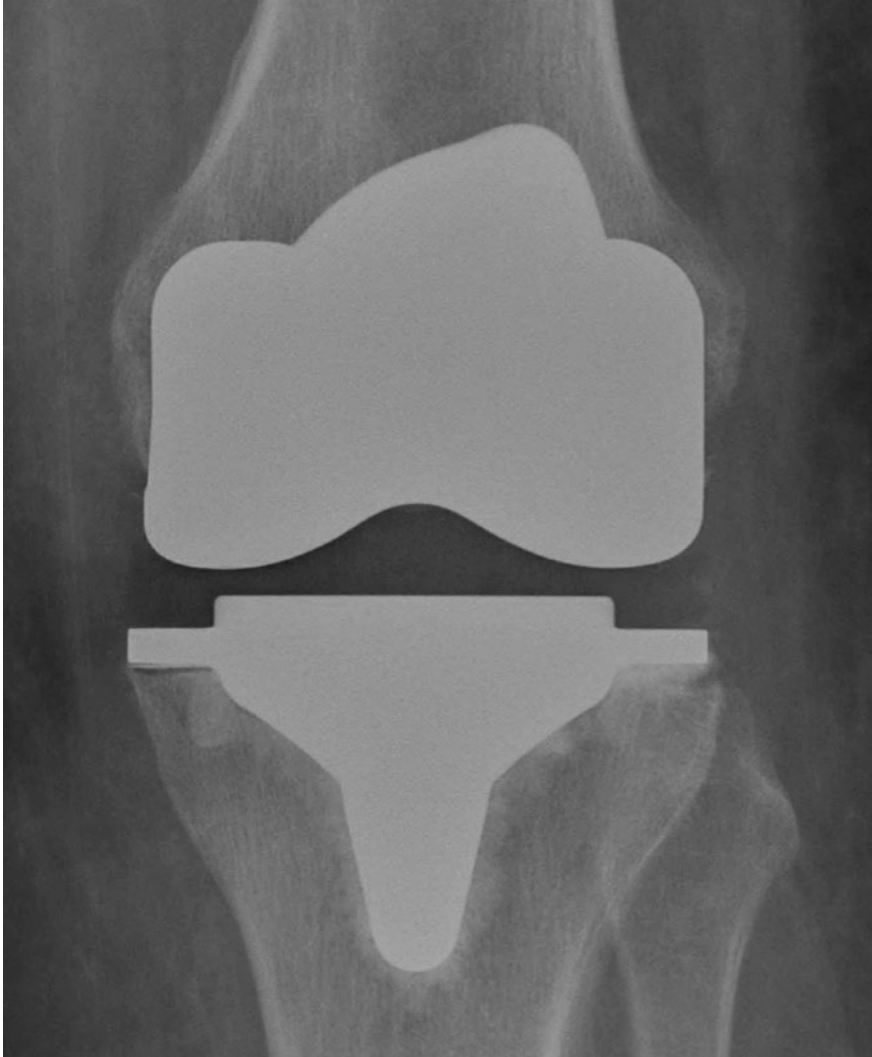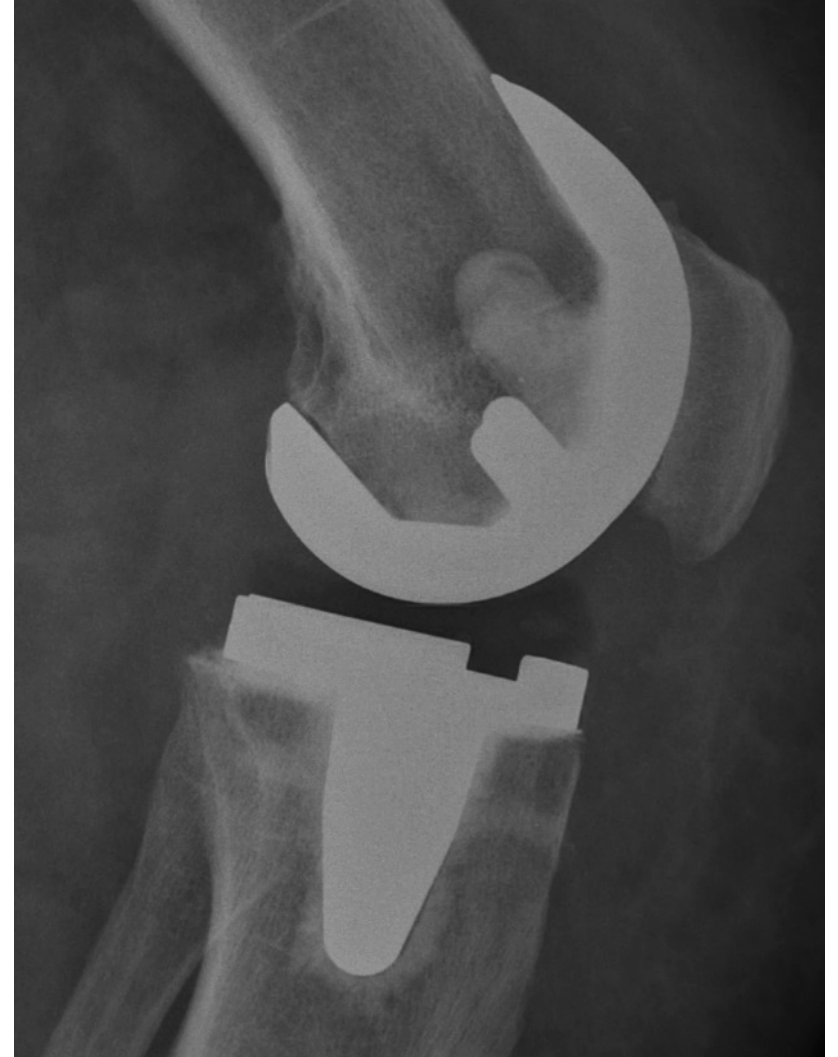

12 months postop

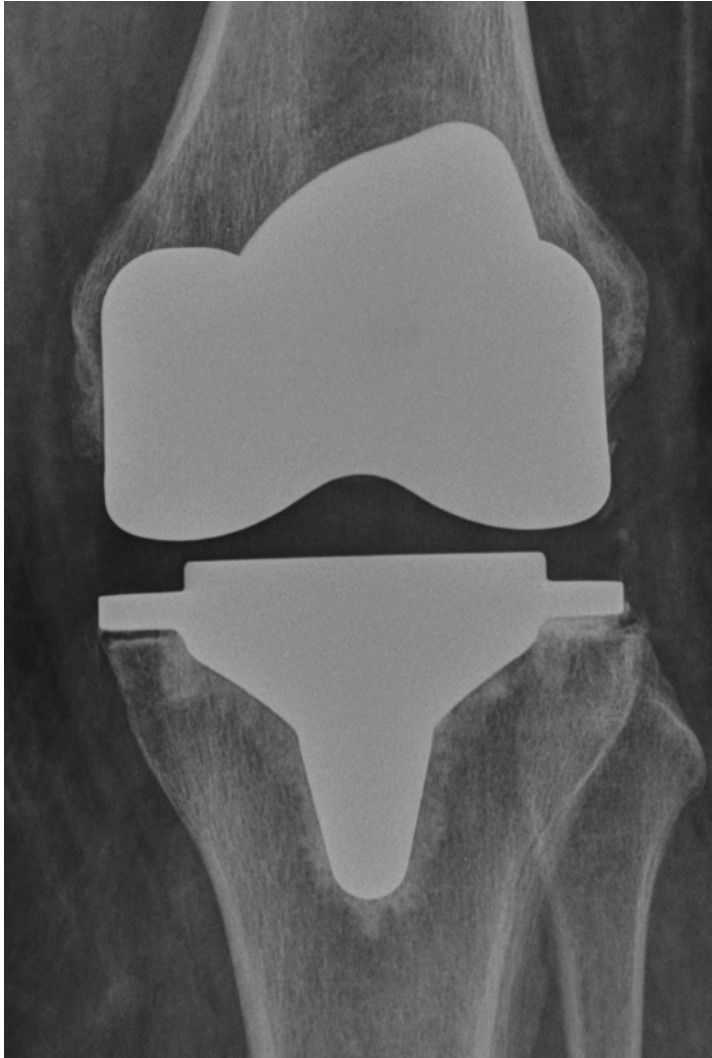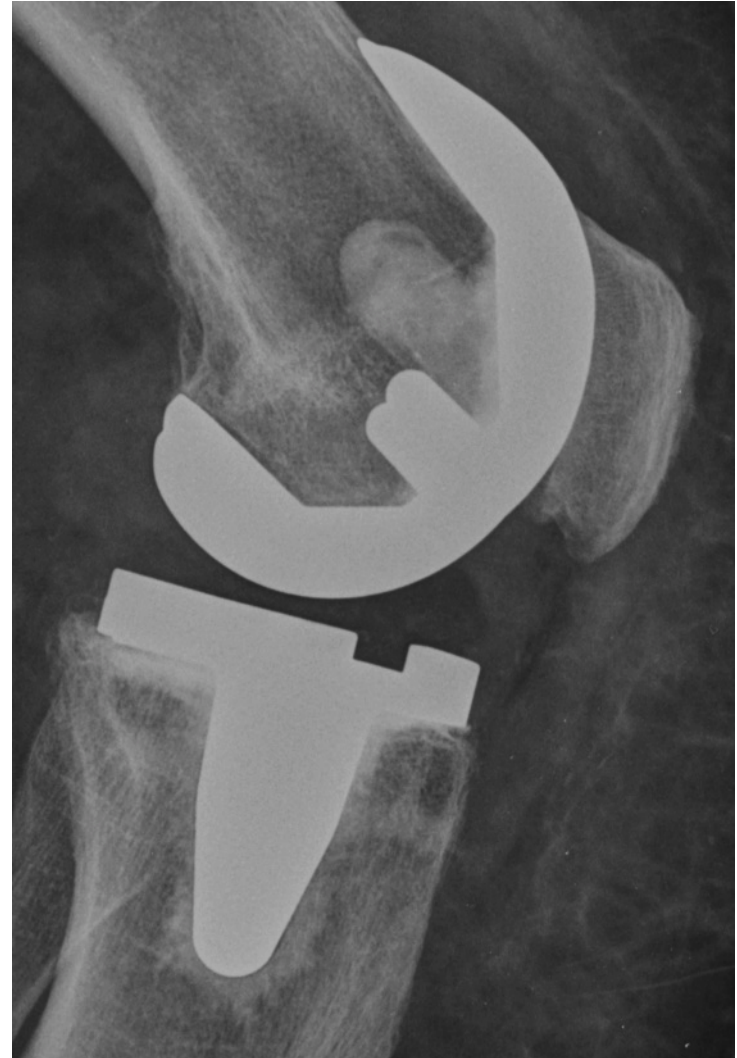

Supplement: MOESM1 [file 16145356]
